# Supplementary material for: Zinc triflate catalyzed regioselective synthesis of pyrrolo[2,3-c]carbazoles via heteroannulation
Source: Royal Society of Chemistry journal article supplement (doi:10.1039/c2ra21735j), 2012-01-01
Supplement: c2ra21735j.pdf [file c2ra21735j.pdf]

**Zinc triflate catalyzed regioselective synthesis of  
pyrrolo[2,3-*c*]carbazoles via heteroannulation**

Mayavan Viji, Rajagopal Nagarajan\*

School of Chemistry, University of Hyderabad

Hyderabad-500046, India

E-mail: [rnc@uohyd.ernet.in](mailto:rnc@uohyd.ernet.in)

## Analytical Data

<sup>1</sup>H NMR of 6-Ethyl-2-methyl-3,6-dihydropyrrolo[2,3-*c*]carbazole (3a):

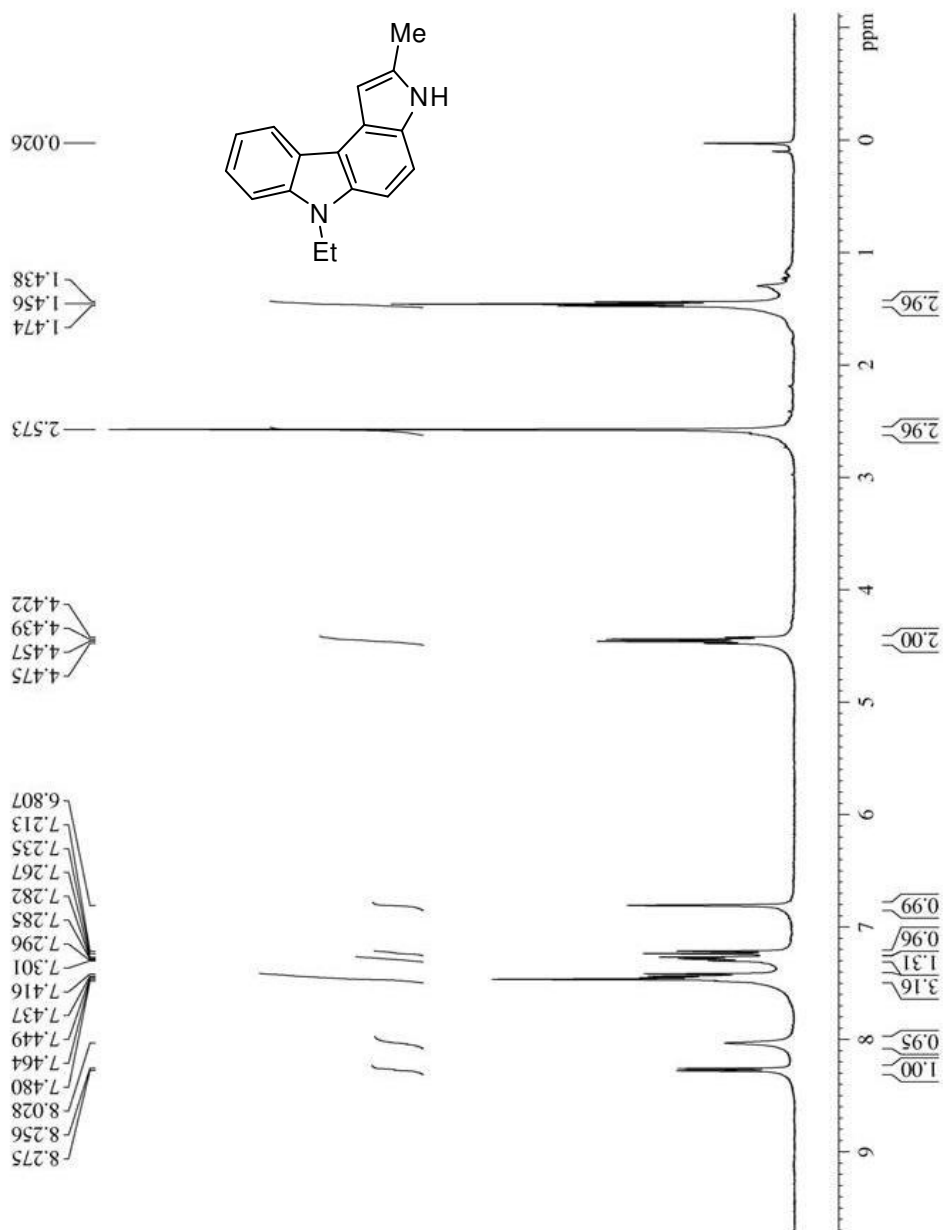

### $^{13}\text{C}$ NMR of 6-Ethyl-2-methyl-3,6-dihydropyrrolo[2,3-*c*]carbazole (3a):

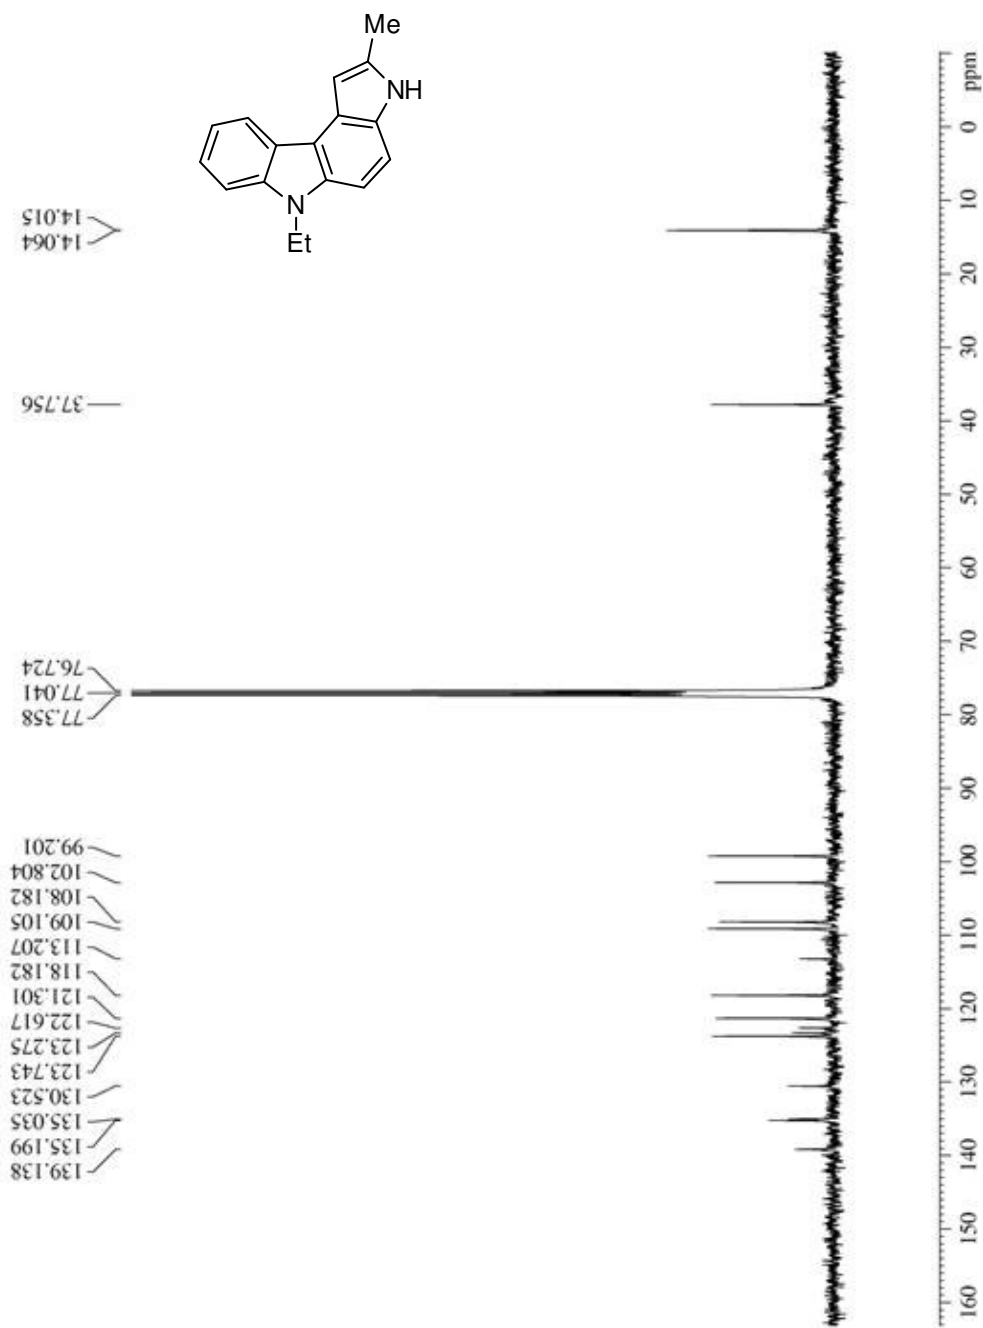

### DEPT of 6-Ethyl-2-methyl-3,6-dihydropyrrolo[2,3-c]carbazole (3a):

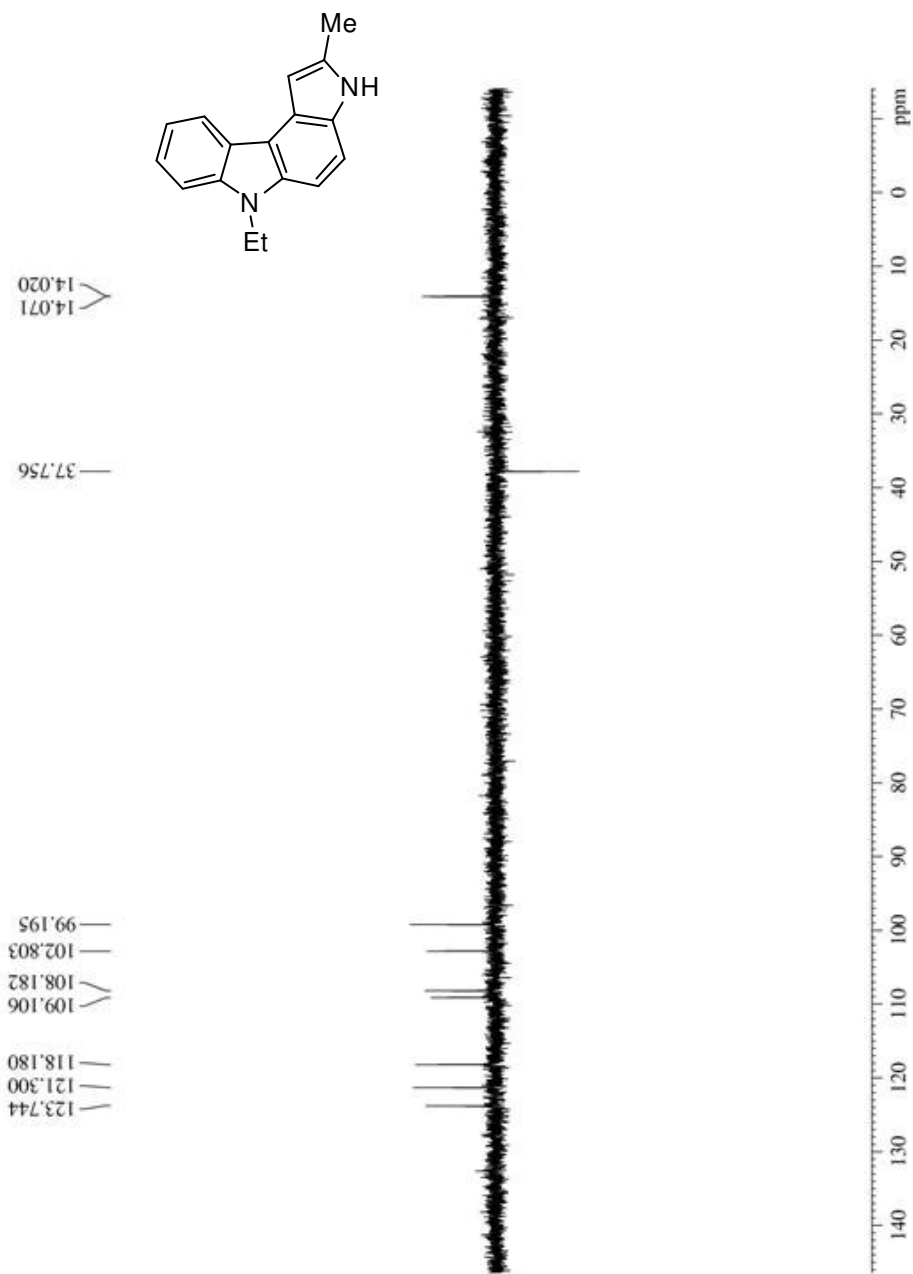

### LC-MS of 6-Ethyl-2-methyl-3,6-dihydropyrrolo[2,3-c]carbazole (3a):

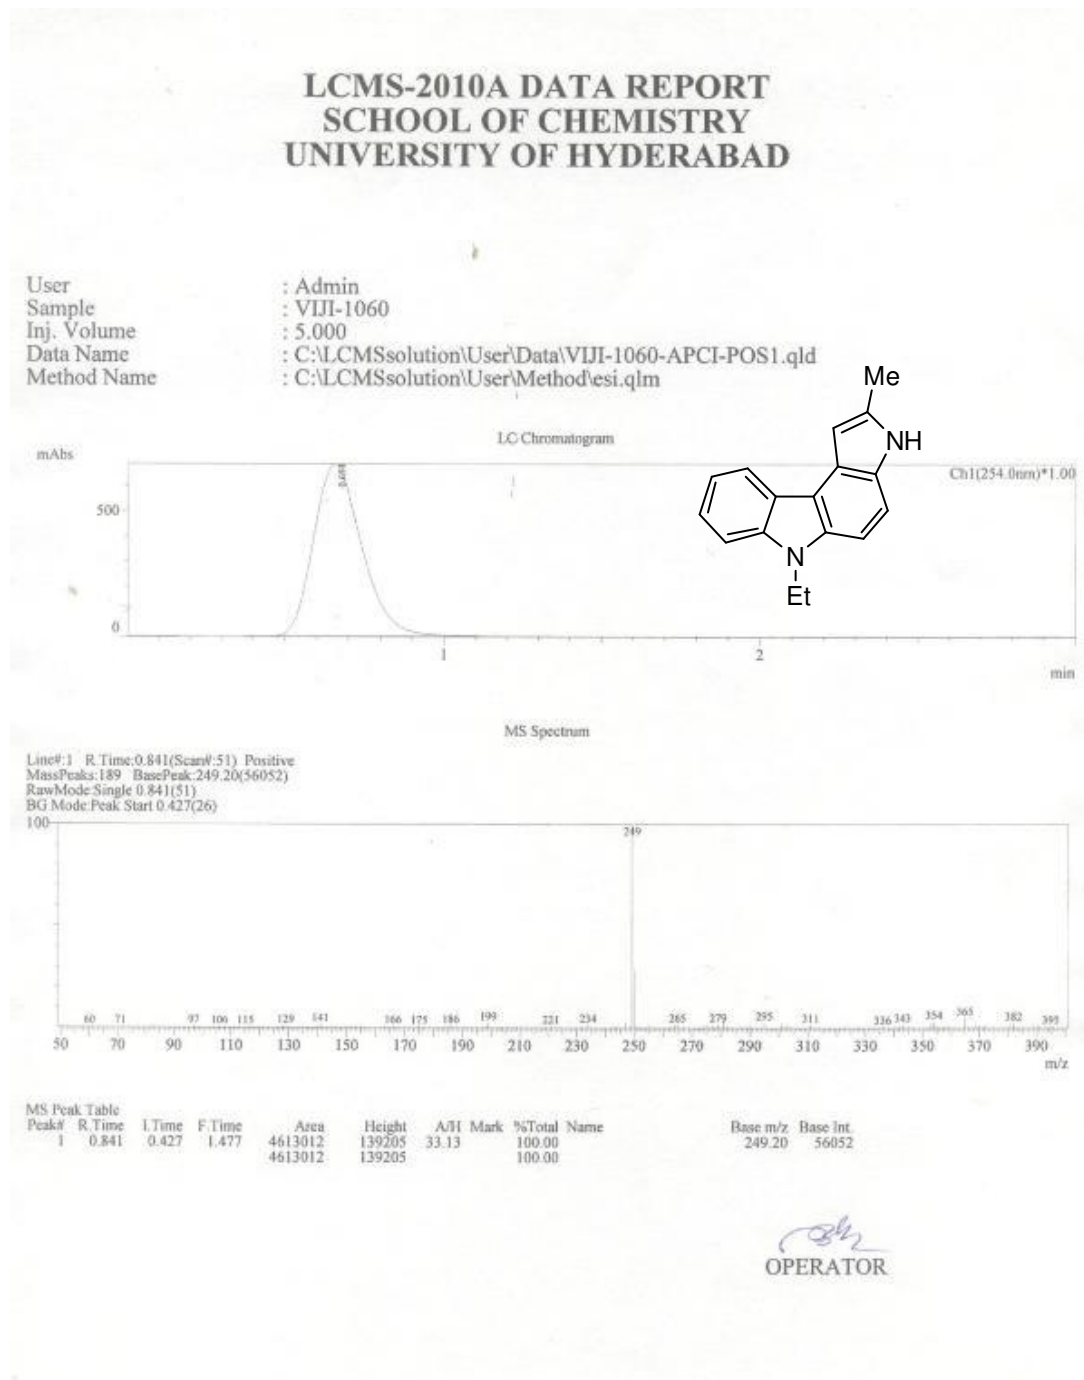

## Elemental Analysis of 6-Ethyl-2-methyl-3,6-dihydropyrrolo[2,3-c]carbazole (3a):

FLASH EA 1112 SERIES CHN REPORT  
SCHOOL OF CHEMISTRY  
UNIVERSITY OF HYDERABAD

Method filename: E:\Program Files\Thermo Finnigan\Eager 300 for EA1112\DATA\Sys\_data\_ex  
Sample ID: VIJI-1074 (# 67)  
Analysis type: UnkNown  
Chromatogram filename: UNK-17102011-17.dat  
Sample weight: .982

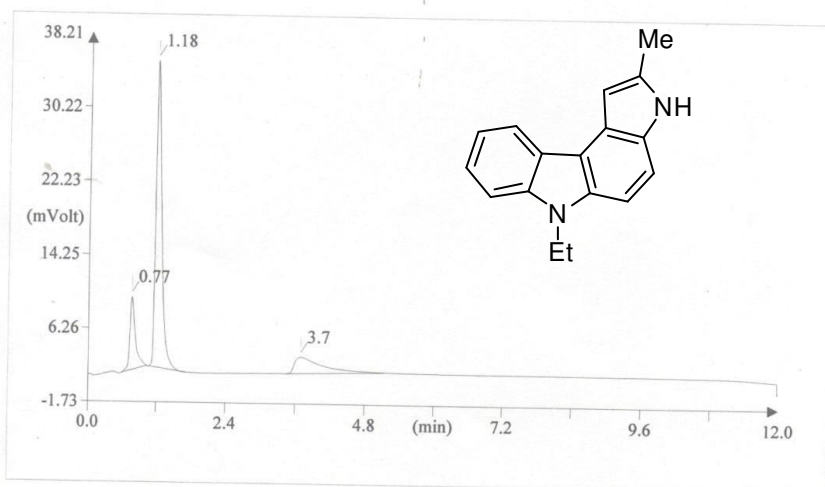

| Element Name | Element % | Ret. Time |
|--------------|-----------|-----------|
| Nitrogen     | 11.15     | 0.77      |
| Carbon       | 82.36     | 1.18      |
| Hydrogen     | 6.55      | 3.70      |

*Signature*

# <sup>1</sup>H NMR of 2,6-dimethyl-3,6-dihydropyrrolo[2,3-c]carbazole (3b)

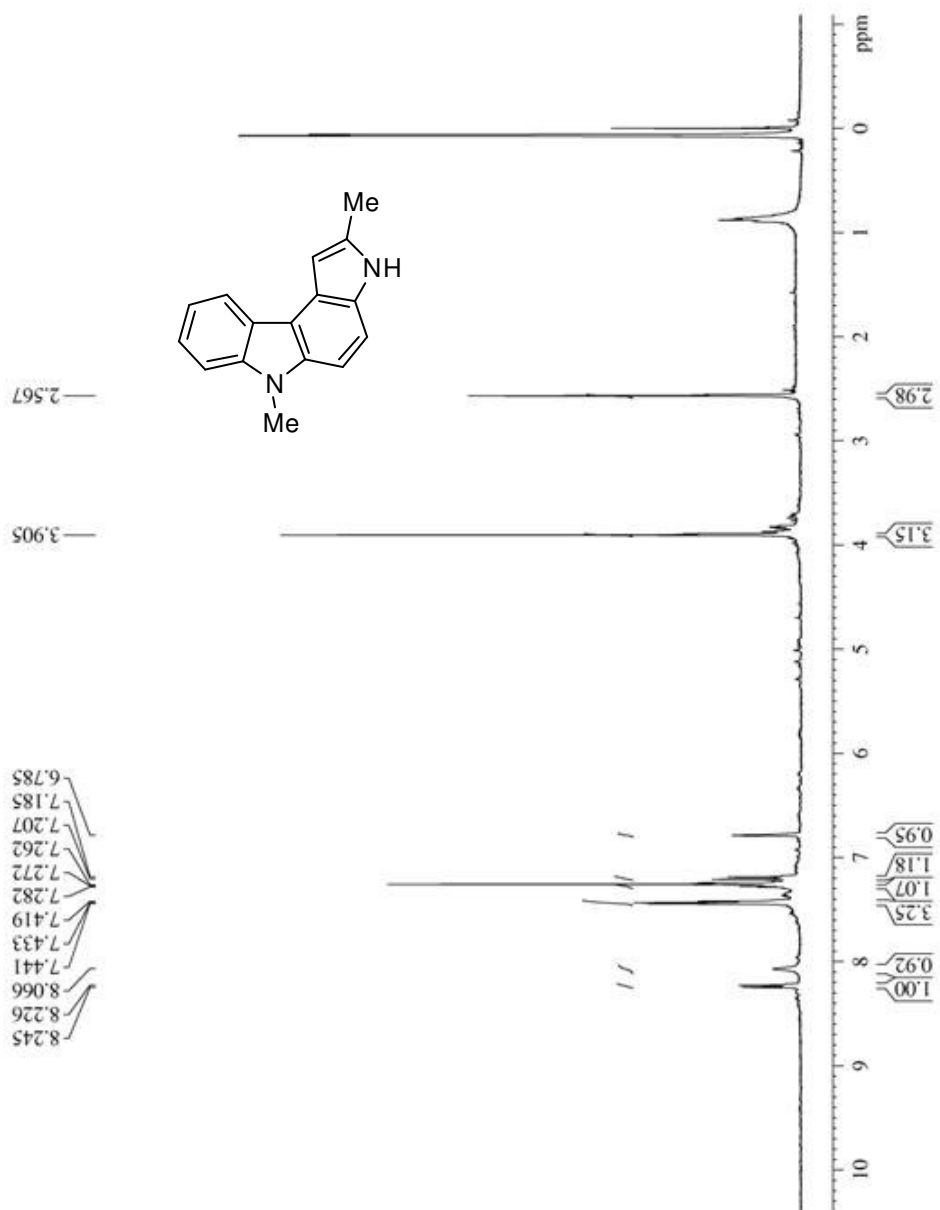

### $^{13}\text{C}$ NMR of 2,6-dimethyl-3,6-dihydropyrrolo[2,3-*c*]carbazole (3b)

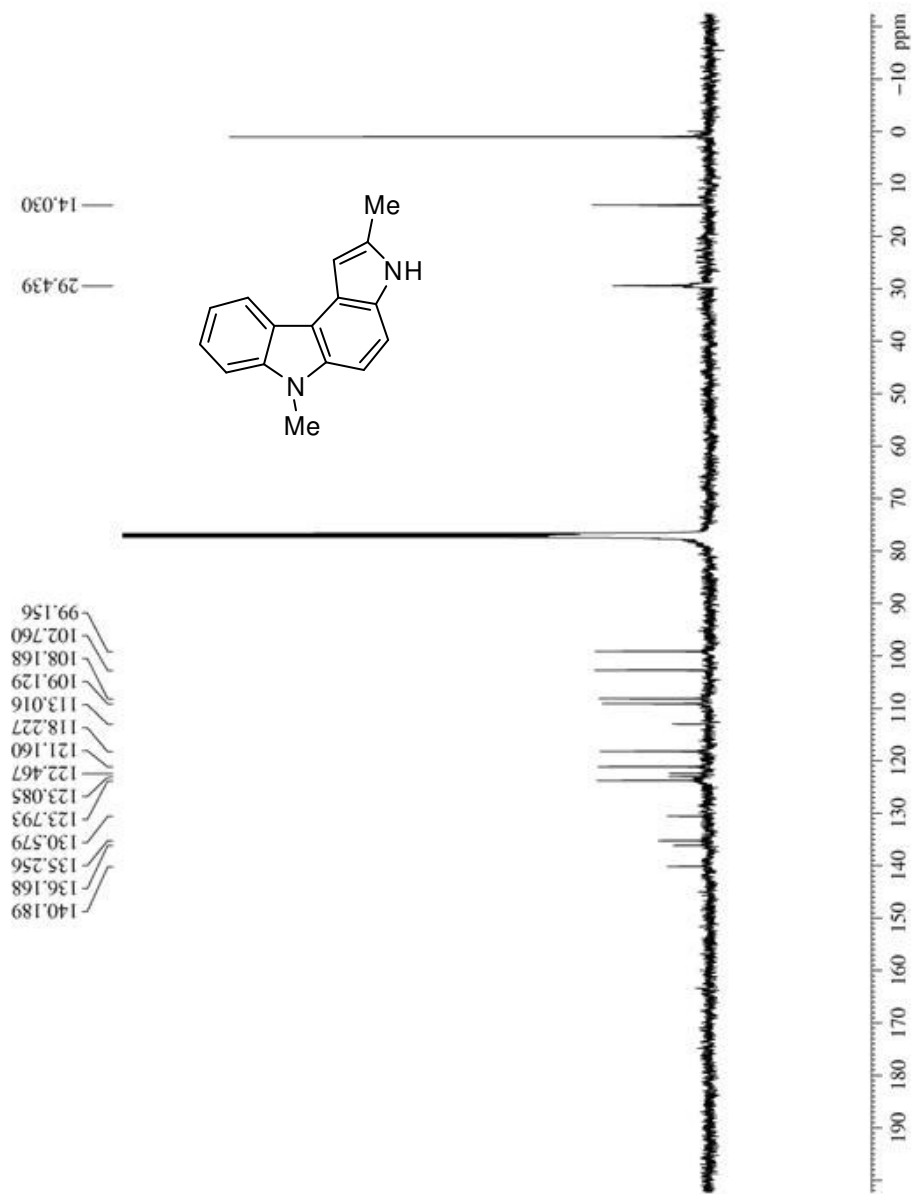



### DEPT of 2,6-dimethyl-3,6-dihydropyrrolo[2,3-*c*]carbazole (3b)

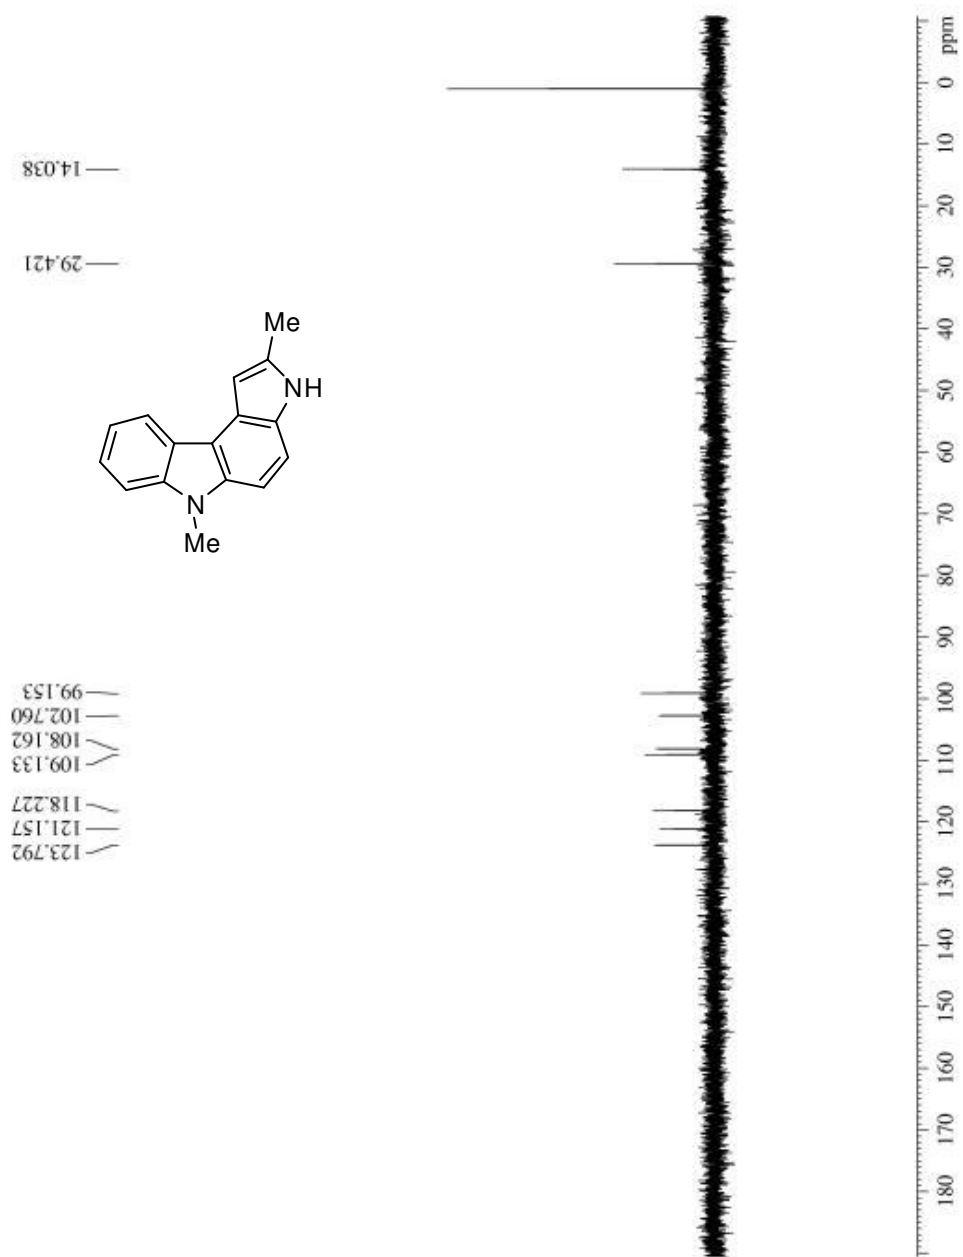

## LC-MS of 2,6-dimethyl-3,6-dihydropyrrolo[2,3-c]carbazole (3b)

LCMS-2010A DATA REPORT  
SCHOOL OF CHEMISTRY  
UNIVERSITY OF HYDERABAD

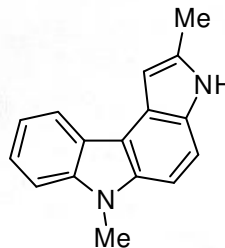

User : Admin  
Sample : VIJI-1149  
Inj. Volume : 5.000  
Data Name : C:\LCMSSolution\User\Data\VIJI-1149-APCI-POS1.qld  
Method Name : C:\LCMSSolution\User\Method\esi.qlm

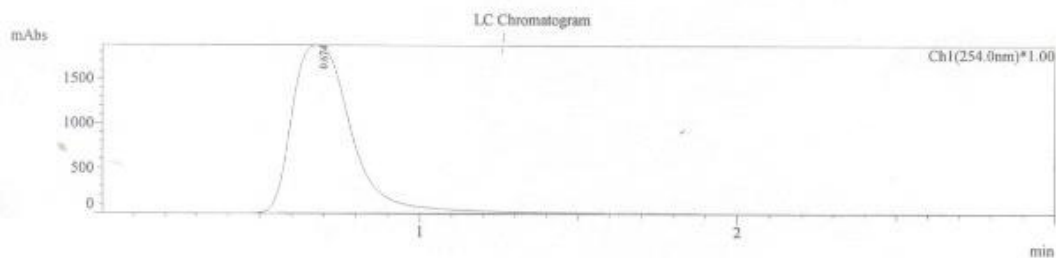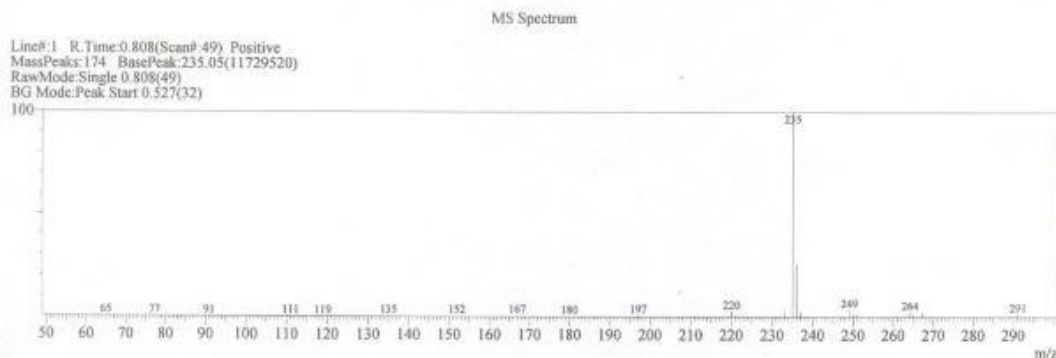

| Peak# | R. Time | I. Time | F. Time | Area      | Height   | A/H   | Mark | %Total | Name | Base m/z | Base Int. |
|-------|---------|---------|---------|-----------|----------|-------|------|--------|------|----------|-----------|
| 1     | 0.808   | 0.527   | 1.043   | 233273585 | 19009476 | 12.27 |      | 100.00 |      | 235.05   | 11729520  |
|       |         |         |         | 233273585 | 19009476 |       |      | 100.00 |      |          |           |

  
OPERATOR

## Elemental Analysis of 2,6-dimethyl-3,6-dihydropyrrolo[2,3-c]carbazole (3b)

FLASH EA 1112 SERIES CHN REPORT  
SCHOOL OF CHEMISTRY  
UNIVERSITY OF HYDERABAD

Method filename: E:\Program Files\Thermo Finnigan\Eager 300 for EA1112\DATA\Sys\_data\_ex  
Sample ID: VIJL-1149 (# 15)  
Analysis type: UnkNown  
Chromatogram filename: UNK-11072012-15.dat  
Sample weight: 1.132

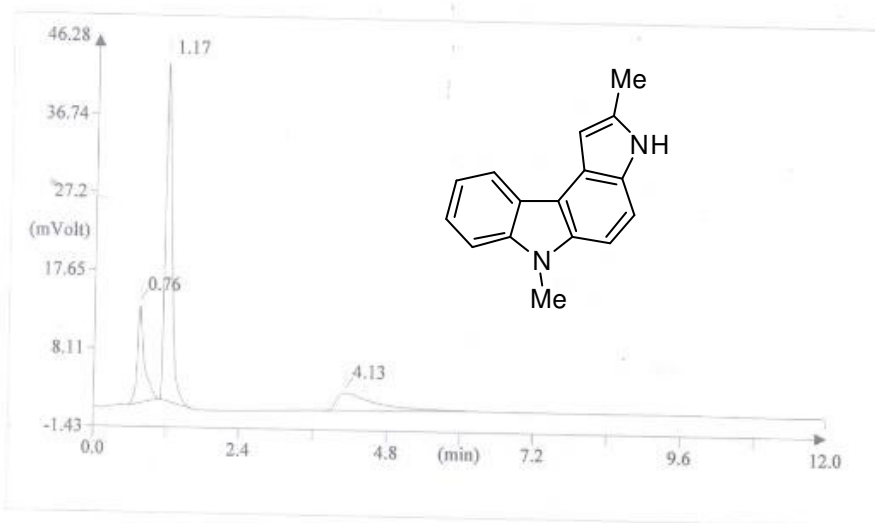

| Element Name | Element % | Ret. Time |
|--------------|-----------|-----------|
| Nitrogen     | 11.78     | 0.76      |
| Carbon       | 81.92     | 1.17      |
| Hydrogen     | 6.12      | 4.13      |

*Handwritten signature*

# <sup>1</sup>H NMR of 6-Butyl-2-methyl-3,6-dihydropyrrolo[2,3-c]carbazole (3c)

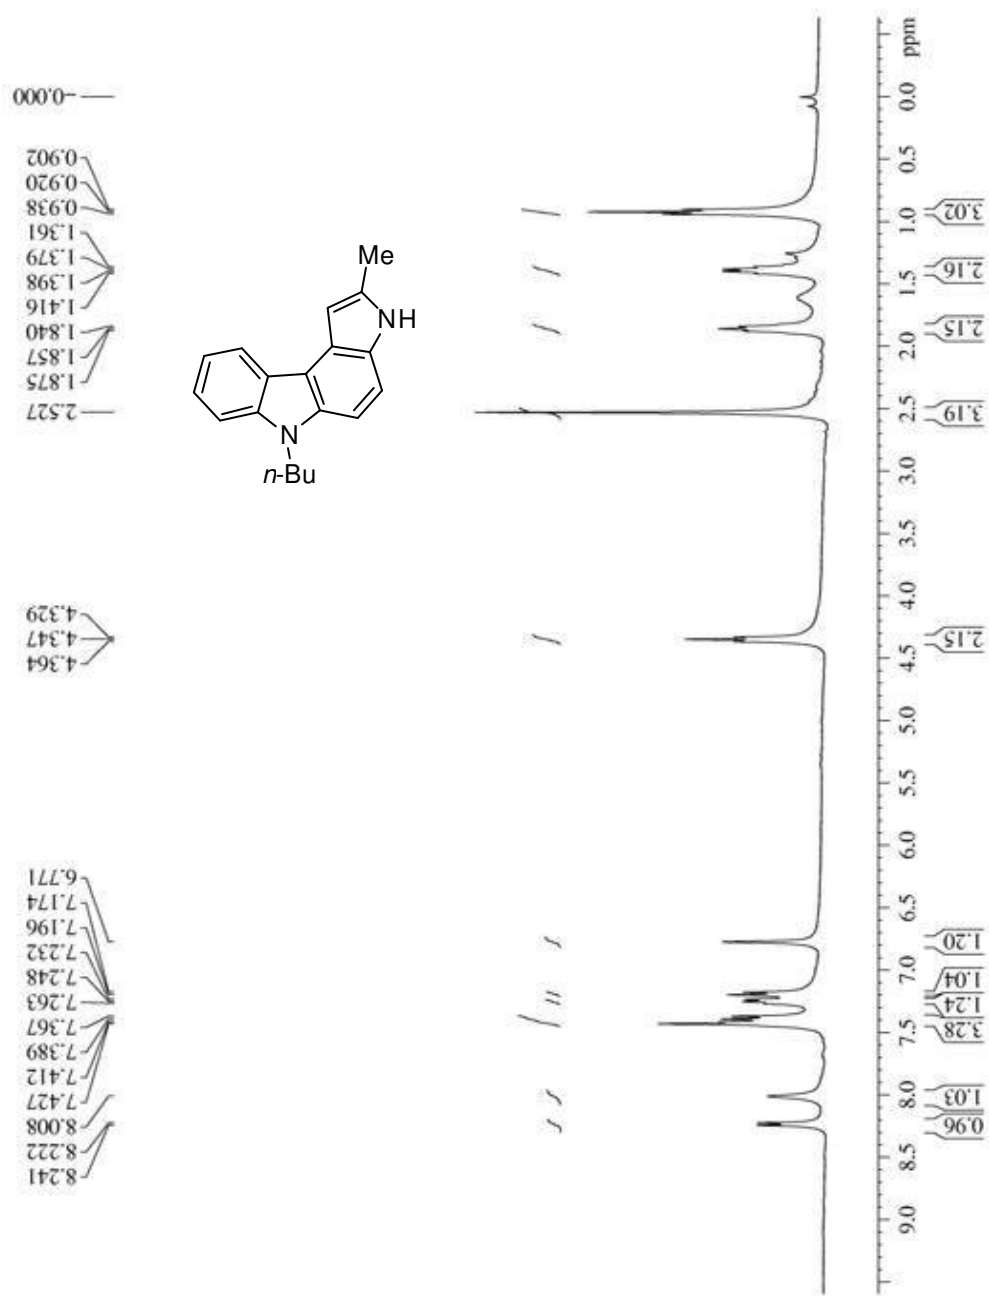

### $^{13}\text{C}$ NMR of 6-Butyl-2-methyl-3,6-dihydropyrrolo[2,3-*c*]carbazole (3c)

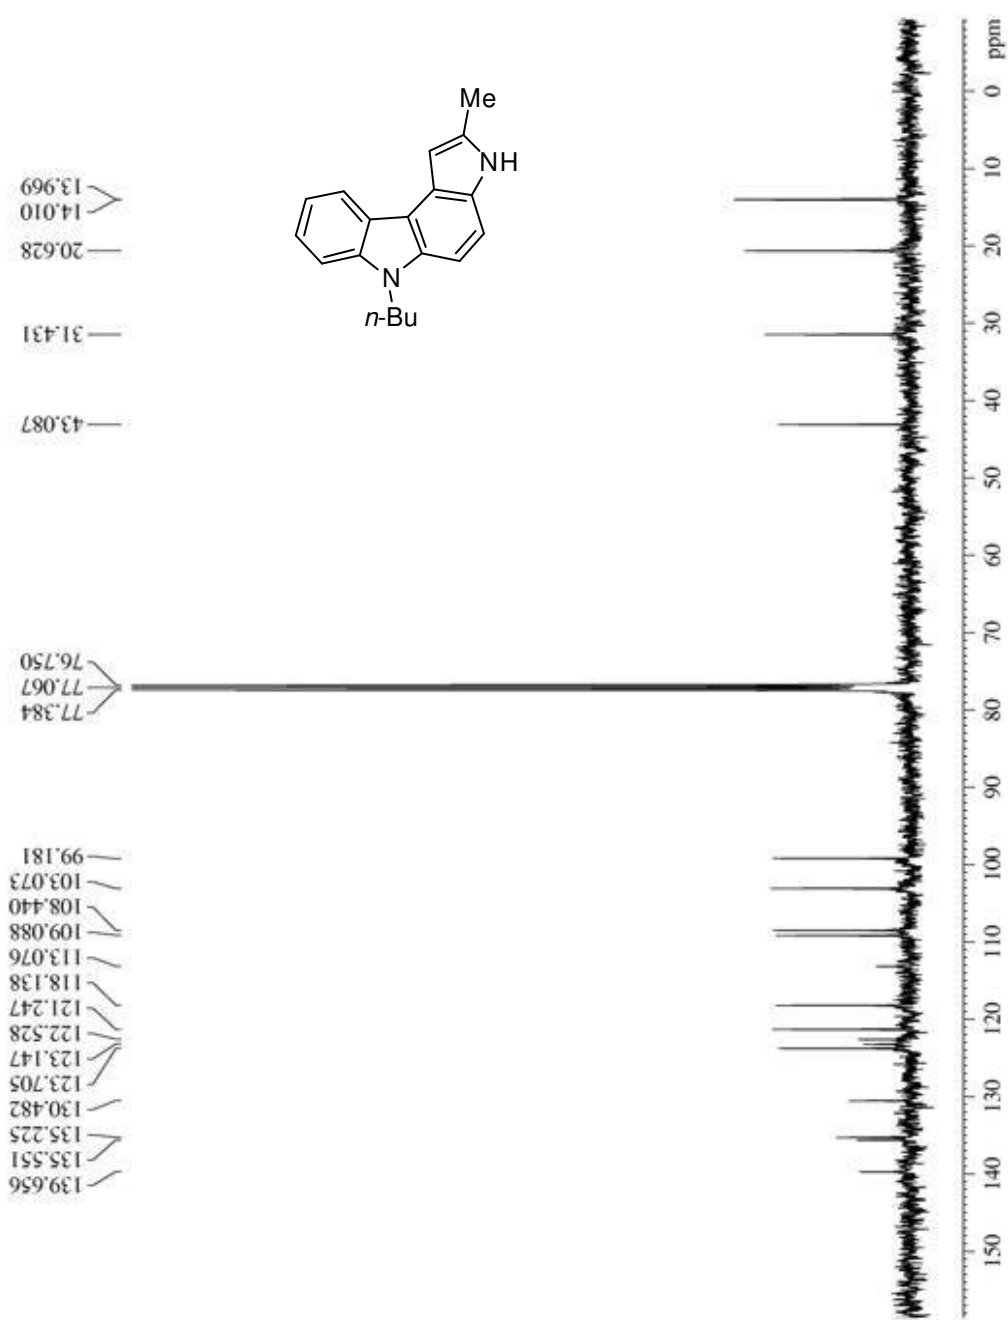

### DEPT of 6-Butyl-2-methyl-3,6-dihydropyrrolo[2,3-c]carbazole (3c)

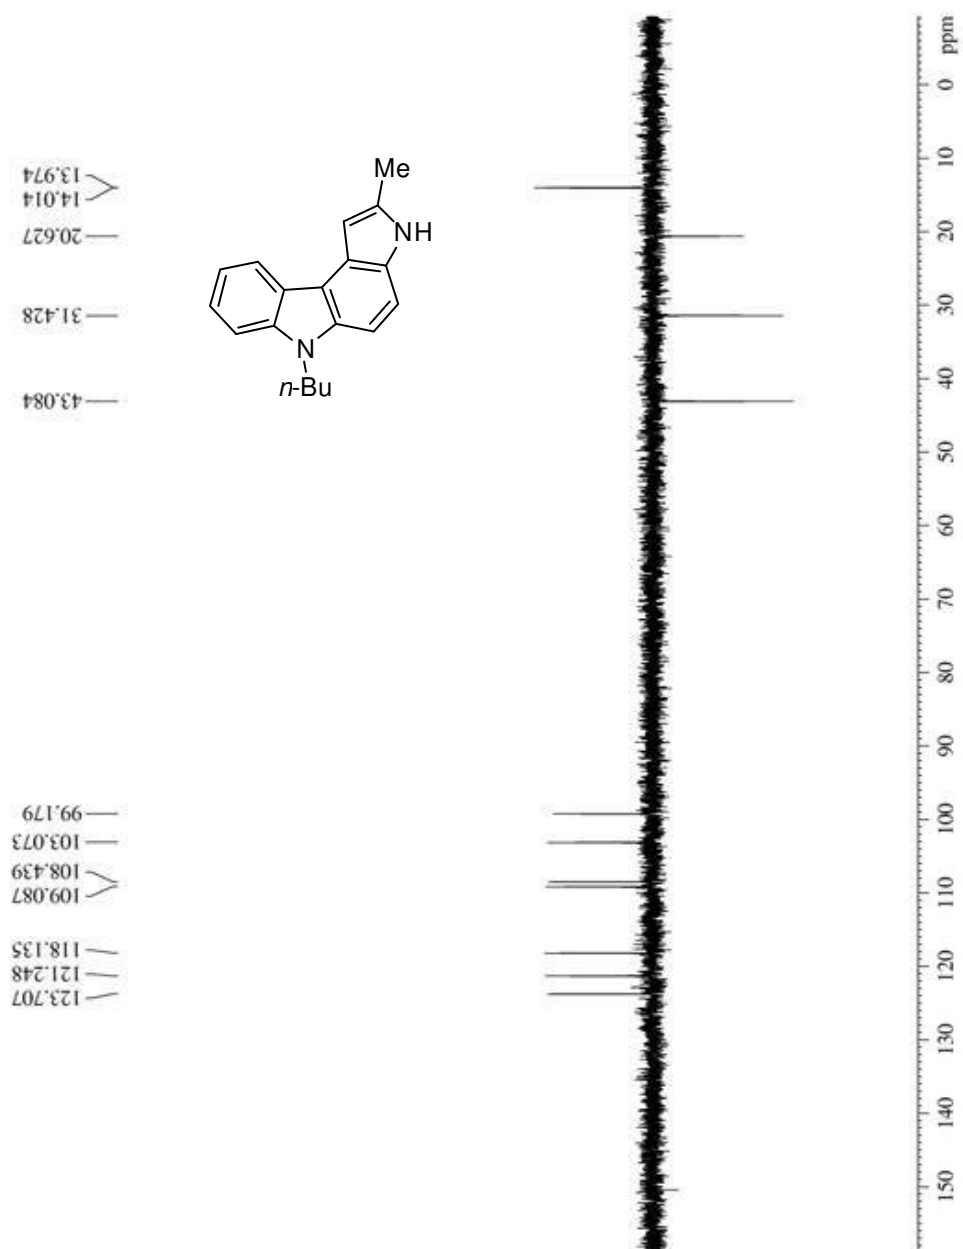

## LC-MS of 6-Butyl-2-methyl-3,6-dihydropyrrolo[2,3-c]carbazole (3c)

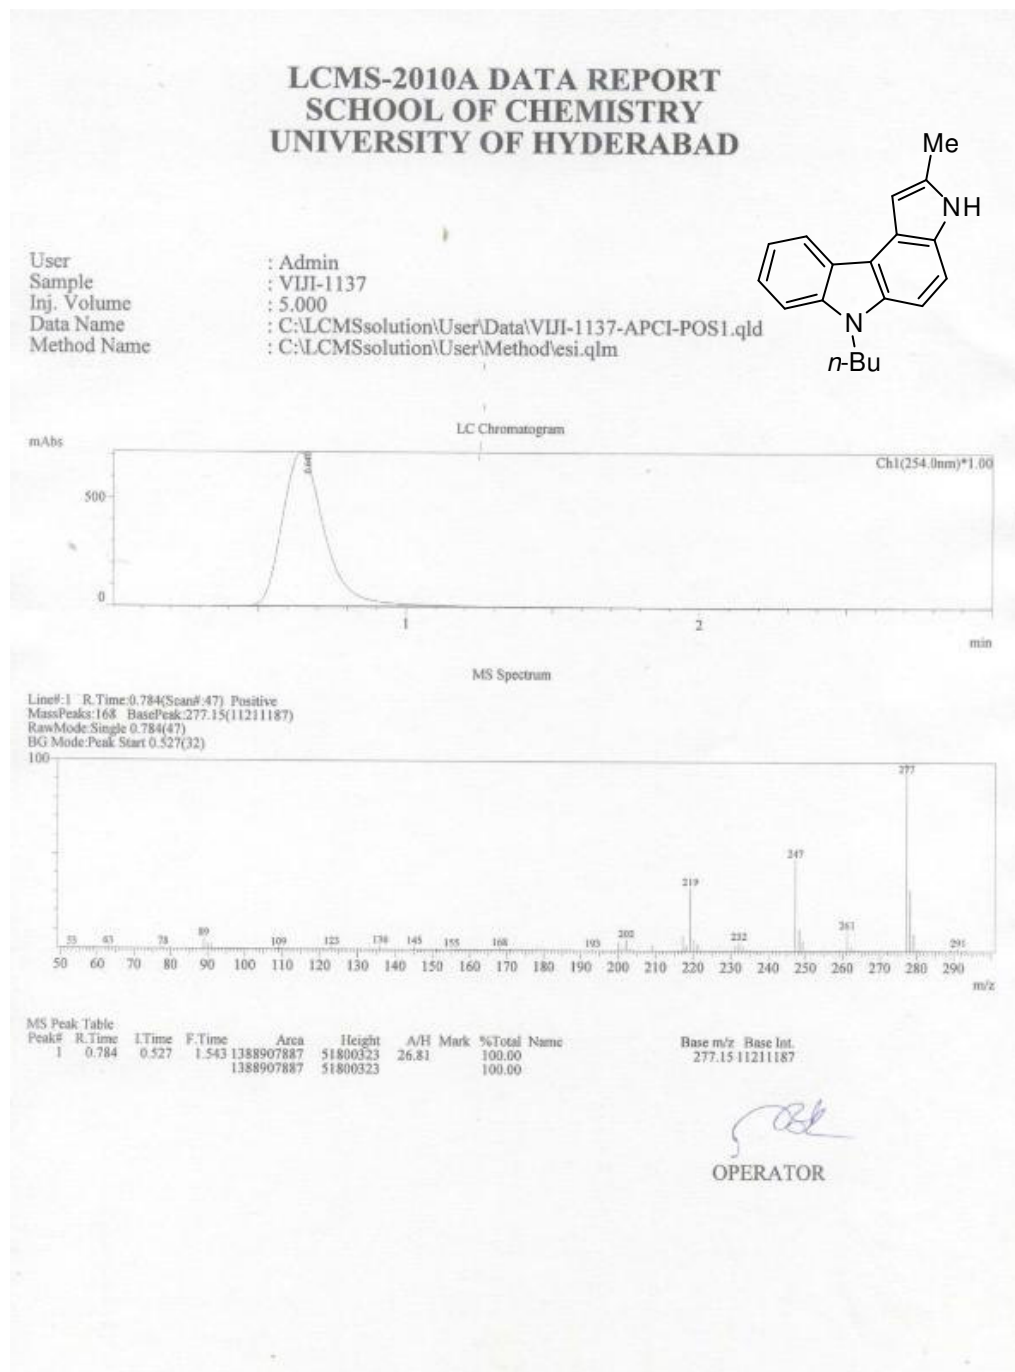

## Elemental Analysis of 6-Butyl-2-methyl-3,6-dihydropyrrolo[2,3-c]carbazole (3c)

FLASH EA 1112 SERIES CHN REPORT  
SCHOOL OF CHEMISTRY  
UNIVERSITY OF HYDERABAD

Method filename: E:\Program Files\Thermo Finnigan\Eager 300 for EA1112\DATA\Sys\_data\_ex  
Sample ID: VIJI-1137 (# 14)  
Analysis type: UnkNown  
Chromatogram filename: UNK-11072012-14.dat  
Sample weight: 1.129

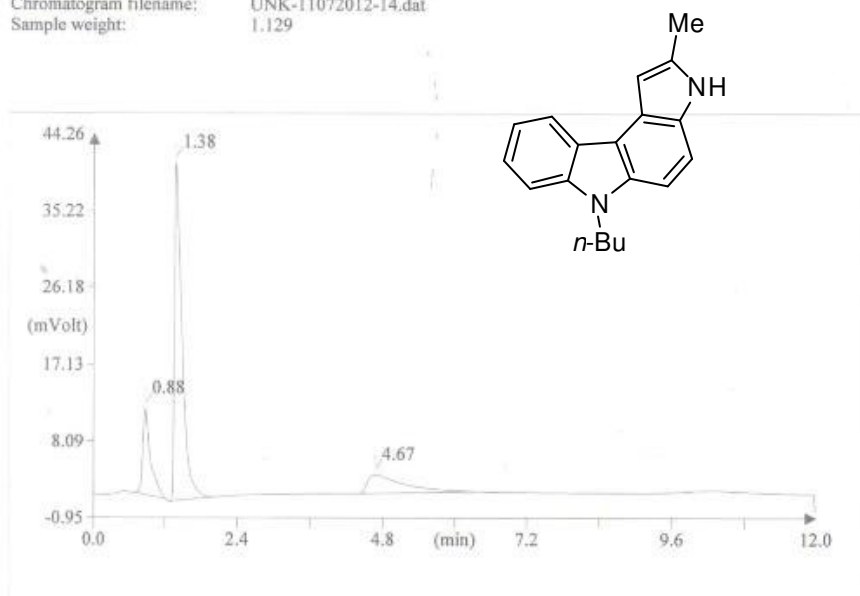

| Element Name | Element % | Ret. Time |
|--------------|-----------|-----------|
| Nitrogen     | 10.25     | 0.88      |
| Carbon       | 82.45     | 1.38      |
| Hydrogen     | 7.23      | 4.67      |

*Handwritten signature*



### <sup>1</sup>H NMR of 6-Benzyl-2-methyl-3,6-dihydropyrrolo[2,3-*c*]carbazole (3d)

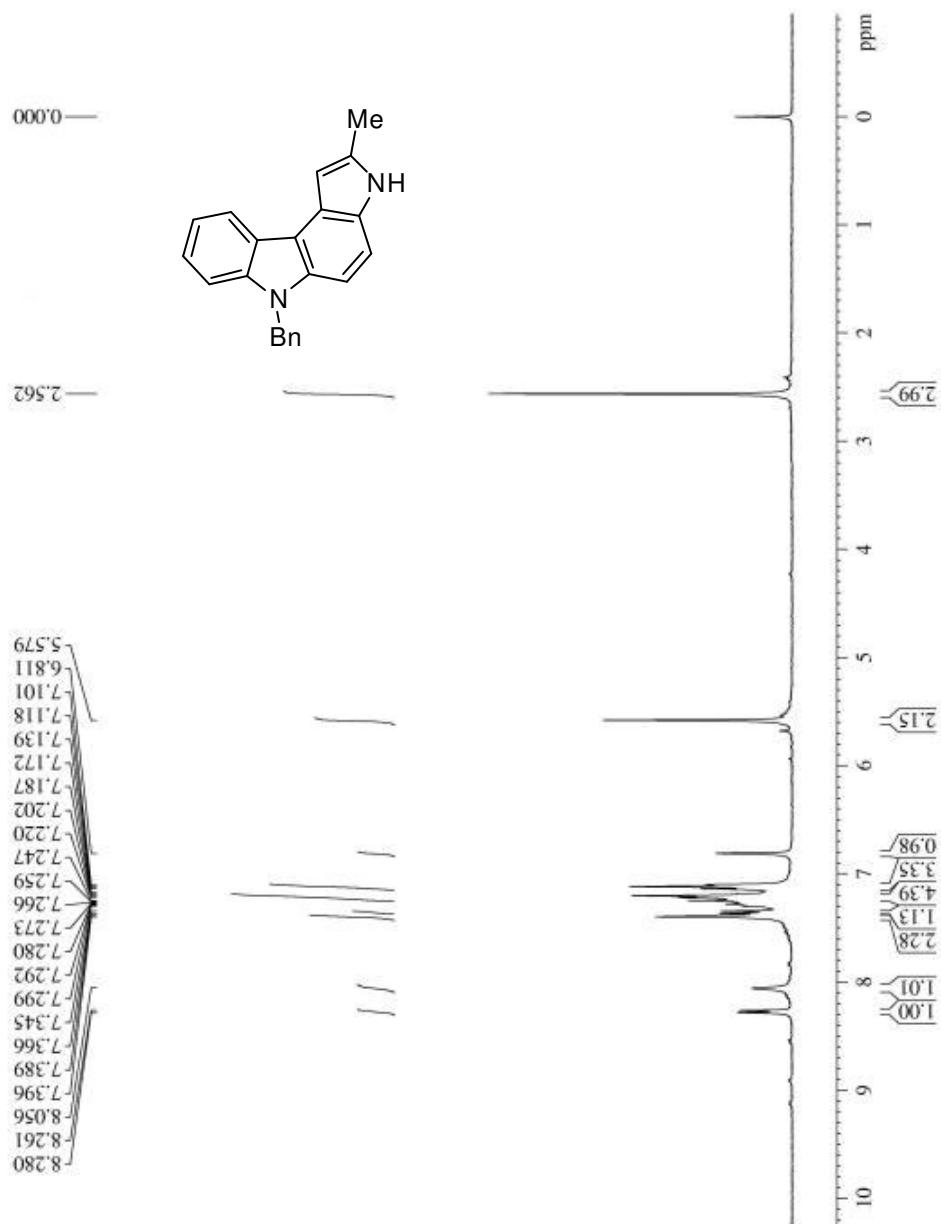

### $^{13}\text{C}$ NMR of 6-Benzyl-2-methyl-3,6-dihydropyrrolo[2,3-*c*]carbazole (3d)

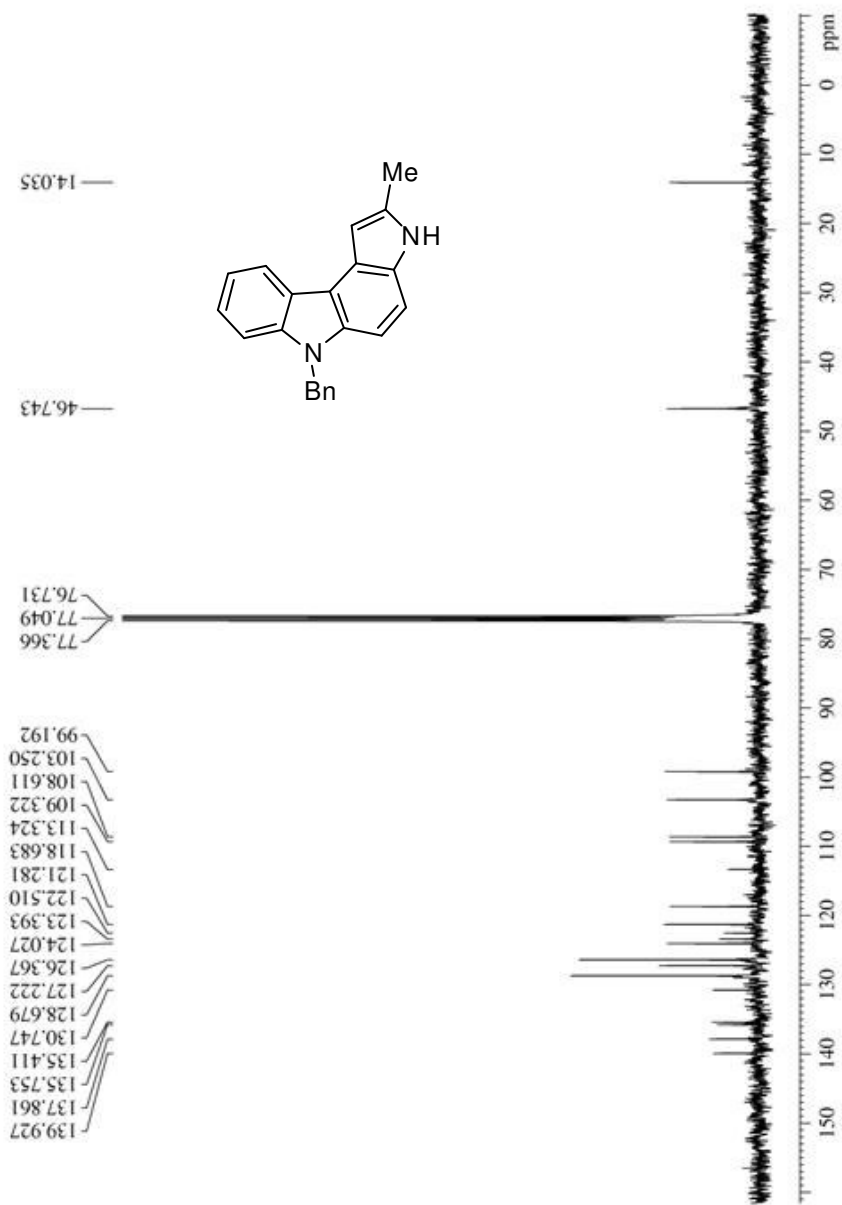

### DEPT of 6-Benzyl-2-methyl-3,6-dihydropyrrolo[2,3-*c*]carbazole (3d)

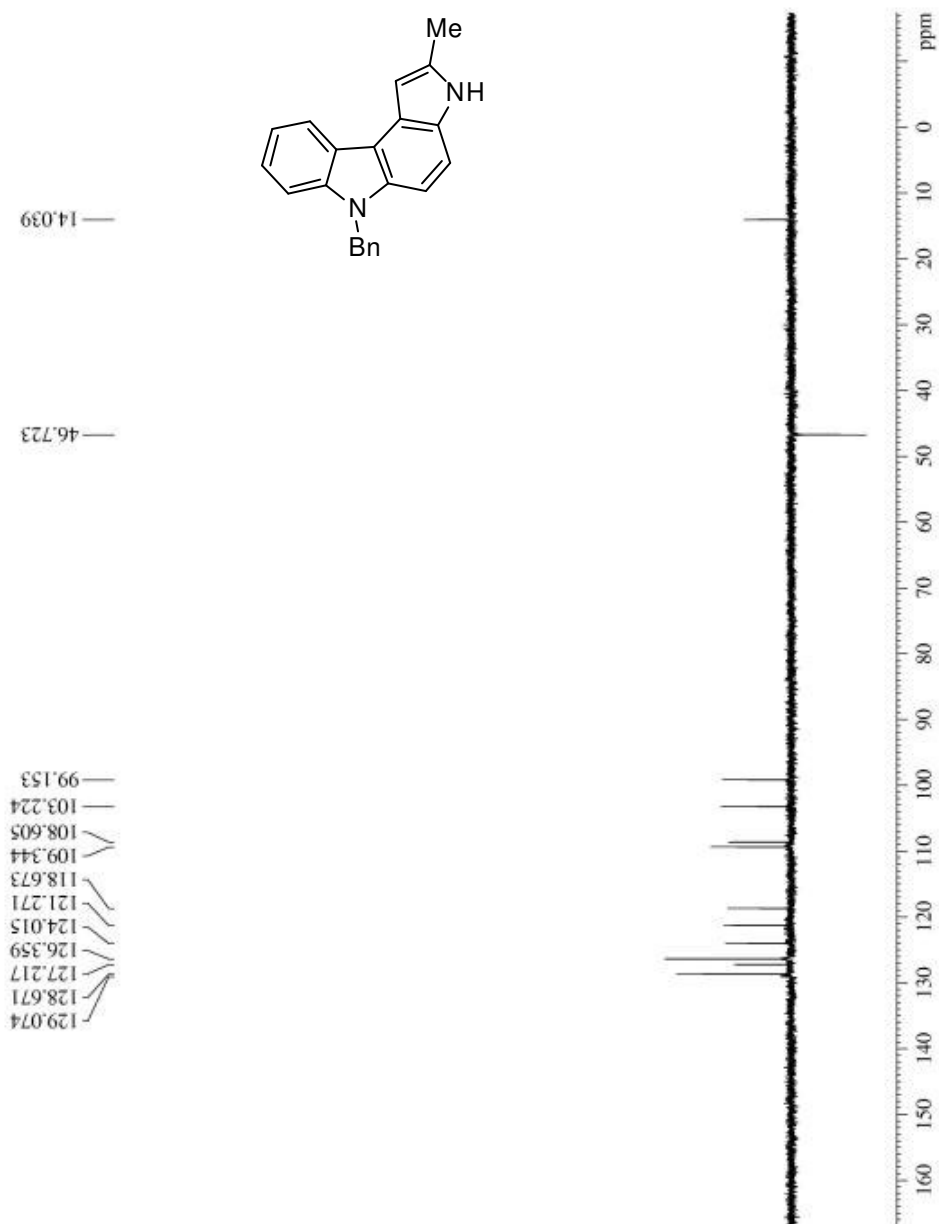

## LC-MS of 6-benzyl-2-methyl-3,6-dihydropyrrolo[2,3-c]carbazole (3d)

### LCMS-2010A DATA REPORT SCHOOL OF CHEMISTRY UNIVERSITY OF HYDERABAD

User : Admin  
Sample : VIJI-1119  
Inj. Volume : 5.000  
Data Name : C:\LCMSsolution\User\Data\VIJI-1119-APCI-POS1.qld  
Method Name : C:\LCMSsolution\User\Method\esi.qlm

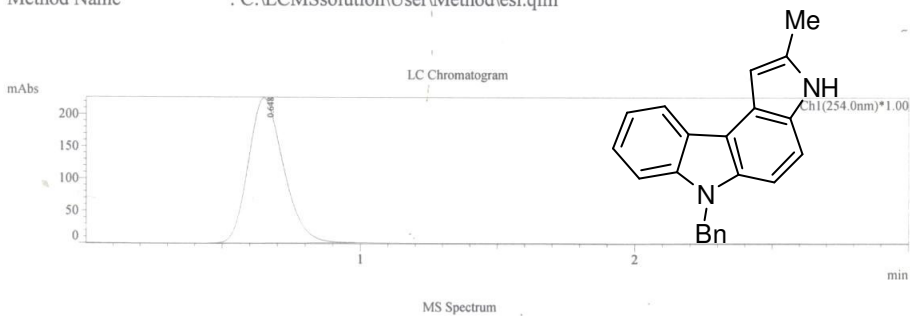

Line#-1 R.Time:0.800(Scan#:48) Positive  
MassPeaks:248 BasePeak:311.35(13705844)  
RawMode:Single 0.800(48)  
BG Mode:Peak Start 0.527(32)

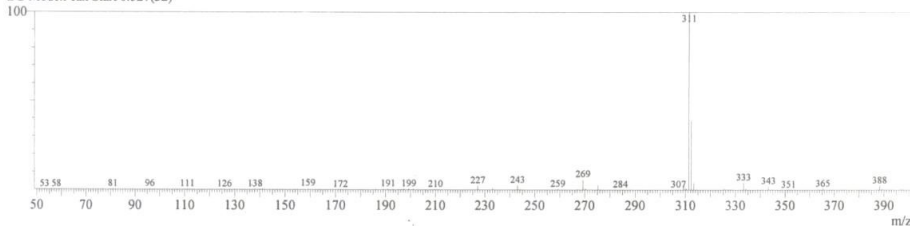

| Peak# | R.Time | I.Time | F.Time | Area      | Height   | A/H   | Mark | %Total | Name | Base m/z | Base Int. |
|-------|--------|--------|--------|-----------|----------|-------|------|--------|------|----------|-----------|
| 1     | 0.800  | 0.527  | 1.143  | 557798340 | 29755190 | 18.74 |      | 100.00 |      | 311.35   | 13705844  |
|       |        |        |        | 557798340 | 29755190 |       |      | 100.00 |      |          |           |

*084*  
OPERATOR

## Elemental Analysis of 6-benzyl-2-methyl-3,6-dihydropyrrolo[2,3-c]carbazole (3d)

FLASH EA 1112 SERIES CHN REPORT  
SCHOOL OF CHEMISTRY  
UNIVERSITY OF HYDERABAD

Method filename: E:\Program Files\Thermo Finnigan\Eager 300 for EA1112\DATA\Sys\_data\_ex  
Sample ID: VIJI-1119 (# 68)  
Analysis type: UnkNown  
Chromatogram filename: UNK-17102011-18.dat  
Sample weight: 1.006

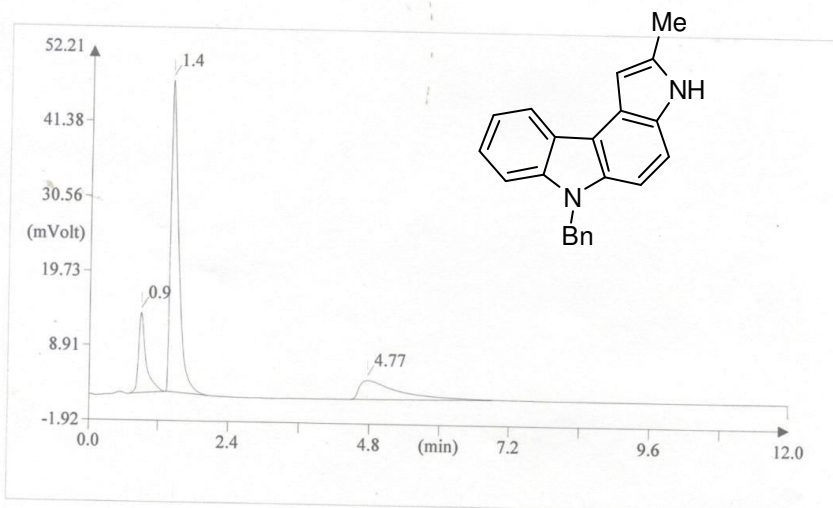

| Element Name | Element % | Ret. Time |
|--------------|-----------|-----------|
| Nitrogen     | 9.12      | 0.90      |
| Carbon       | 84.91     | 1.40      |
| Hydrogen     | 5.79      | 4.77      |

*Signature*

# <sup>1</sup>H NMR of 7,9-Dichloro-2,6-dimethyl-3,6-dihydropyrrolo[2,3-*c*]carbazole (3e)

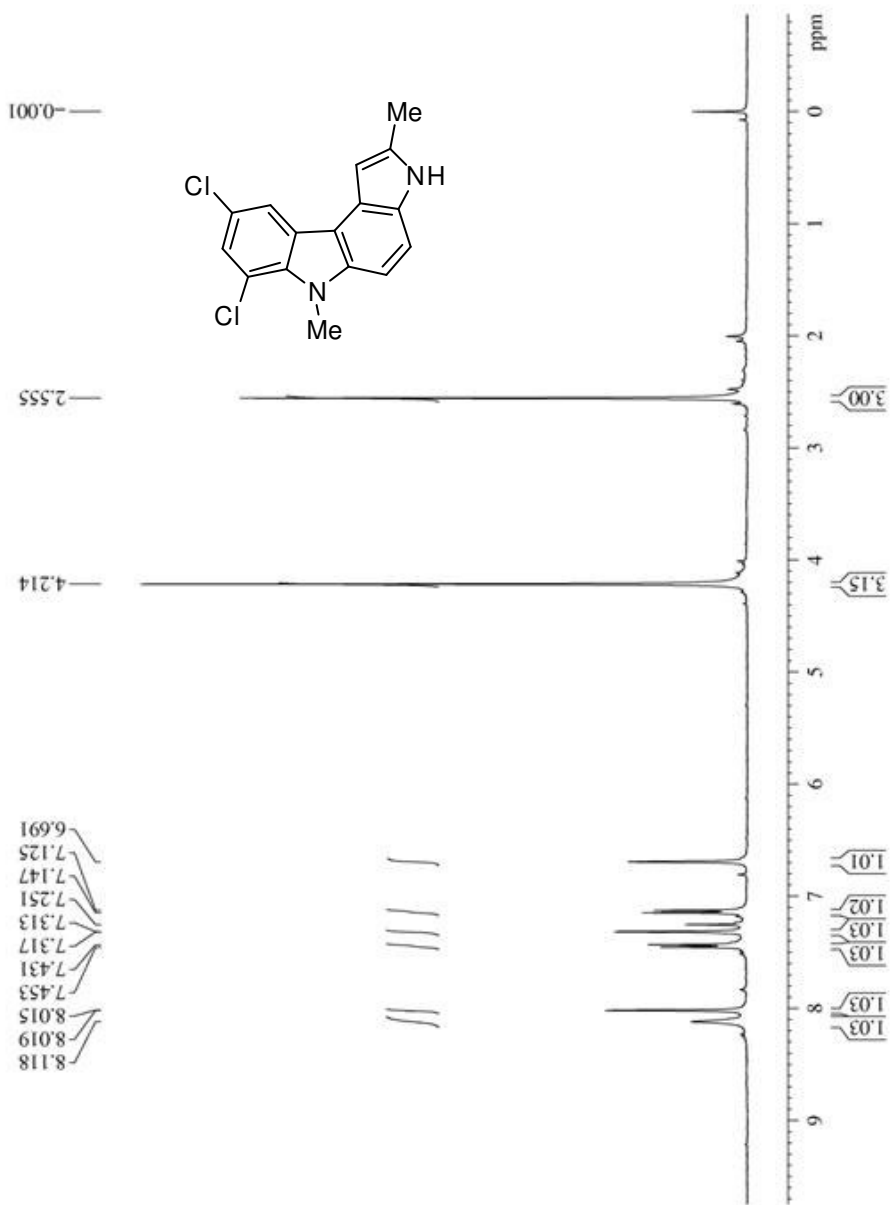

# $^{13}\text{C}$ NMR of 7,9-Dichloro-2,6-dimethyl-3,6-dihydropyrrolo[2,3-c]carbazole (3e)

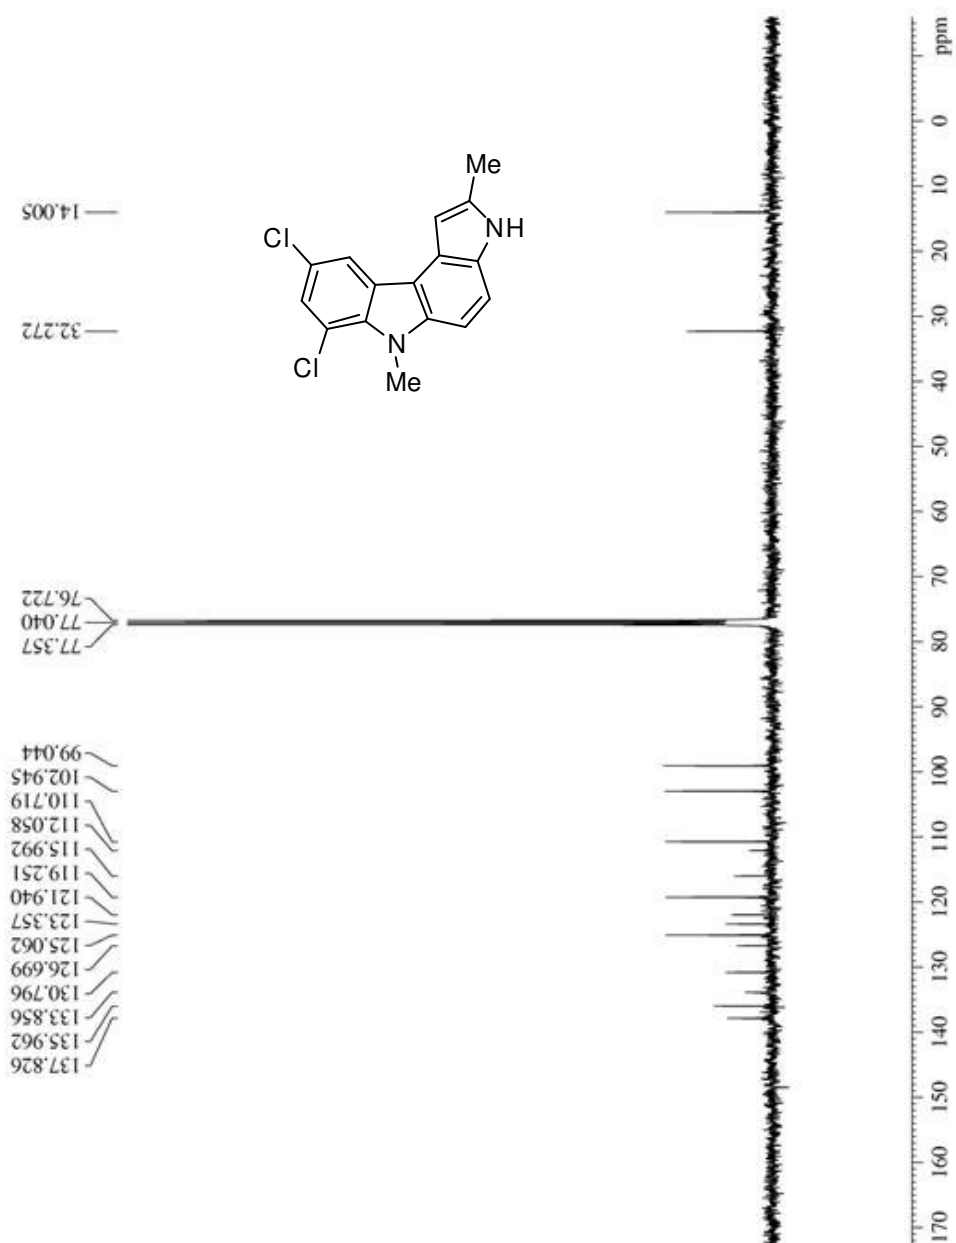

### DEPT of 7,9-Dichloro-2,6-dimethyl-3,6-dihydropyrrolo[2,3-*c*]carbazole (3e)

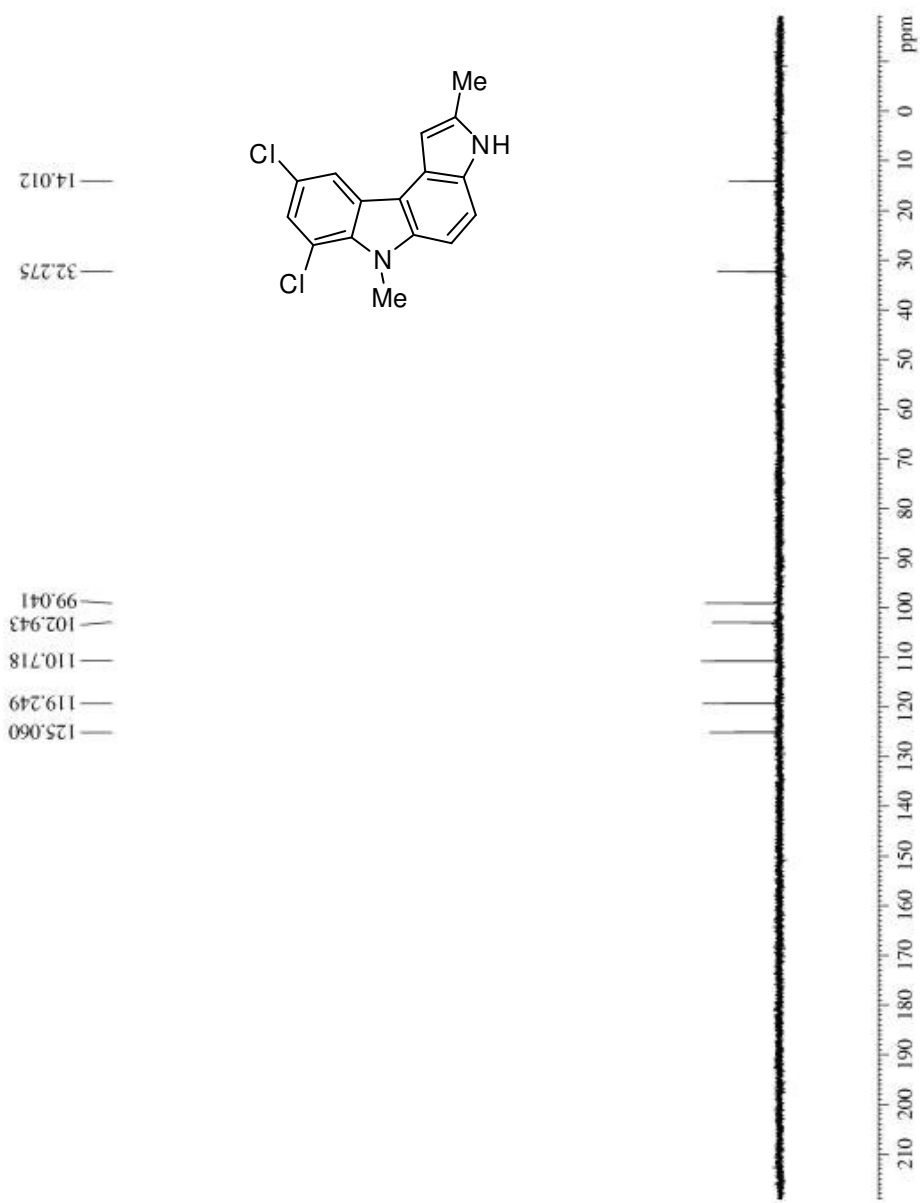



# LC-MS Spectra of 7,9-Dichloro-2,6-dimethyl-3,6-dihydropyrrolo[2,3-c]carbazole (3e)

## LCMS-2010A DATA REPORT SCHOOL OF CHEMISTRY UNIVERSITY OF HYDERABAD

User : Admin  
Sample : VIJI1121  
Inj. Volume : 5.000  
Data Name : C:\LCMSsolution\User\Data\VIJI1121-ESI-NEG1.qld  
Method Name : C:\LCMSsolution\User\Method\esi.qlm

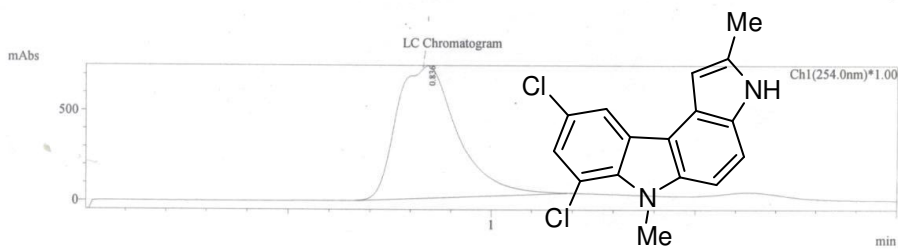

MS Spectrum

Line#:1 R.Time:0.877(Scan#:53) Negative  
MassPeaks:145 BasePeak:301.10(548969)  
RawMode:Single 0.877(53)  
BG Mode:Peak Start 0.710(43)

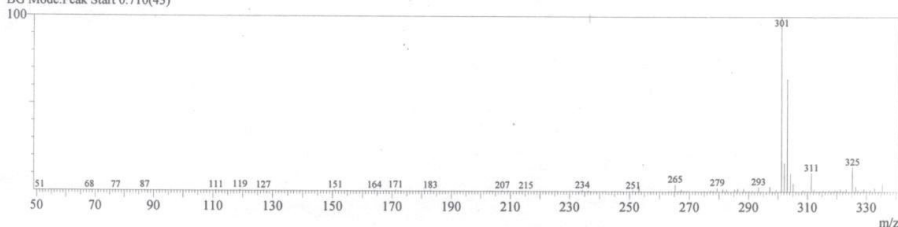

| Peak# | R.Time | LTime | F.Time | Area     | Height  | A/H   | Mark | %Total | Name | Base m/z | Base Int. |
|-------|--------|-------|--------|----------|---------|-------|------|--------|------|----------|-----------|
| 1     | 0.877  | 0.710 | 1.193  | 47627177 | 3731805 | 12.76 |      | 100.00 |      | 301.10   | 548969    |
|       |        |       |        | 47627177 | 3731805 |       |      | 100.00 |      |          |           |

  
OPERATOR

# Elemental Analysis Spectra of 7,9-Dichloro-2,6-dimethyl-3,6-dihydropyrrolo[2,3-c]carbazole (3e)

## FLASH EA 1112 SERIES CHN REPORT SCHOOL OF CHEMISTRY UNIVERSITY OF HYDERABAD

Method filename: E:\Program Files\Thermo Finnigan\Eager 300 for EA1112\DATA\Sys\_data\_ex  
Sample ID: VIJL-1121 (# 65)  
Analysis type: UnkNown  
Chromatogram filename: UNK-17102011-15.dat  
Sample weight: 1.113

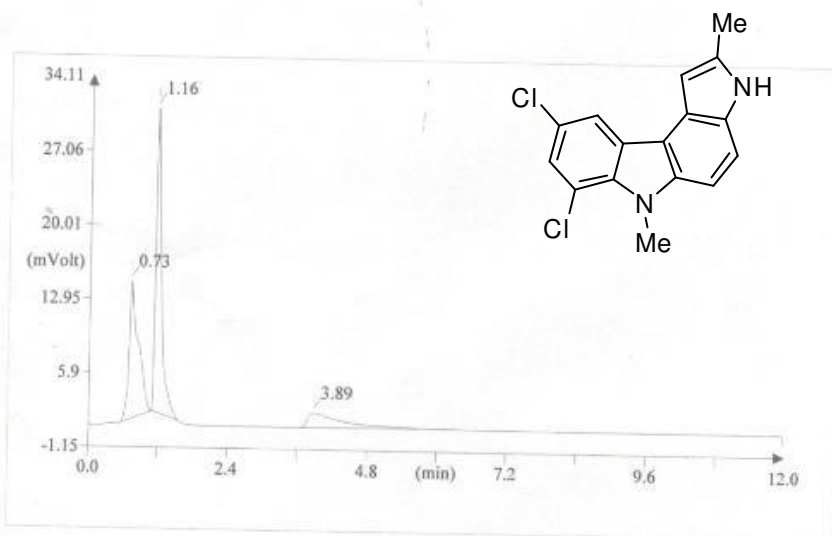

| Element Name | Element % | Ret. Time |
|--------------|-----------|-----------|
| Nitrogen     | 9.15      | 0.73      |
| Carbon       | 63.45     | 1.16      |
| Hydrogen     | 3.91      | 3.89      |

*(Handwritten signature)*

# <sup>1</sup>H NMR of 7,9-Dichloro-6-ethyl-2-methyl-3,6-dihydropyrrolo[2,3-c]carbazole (3f)

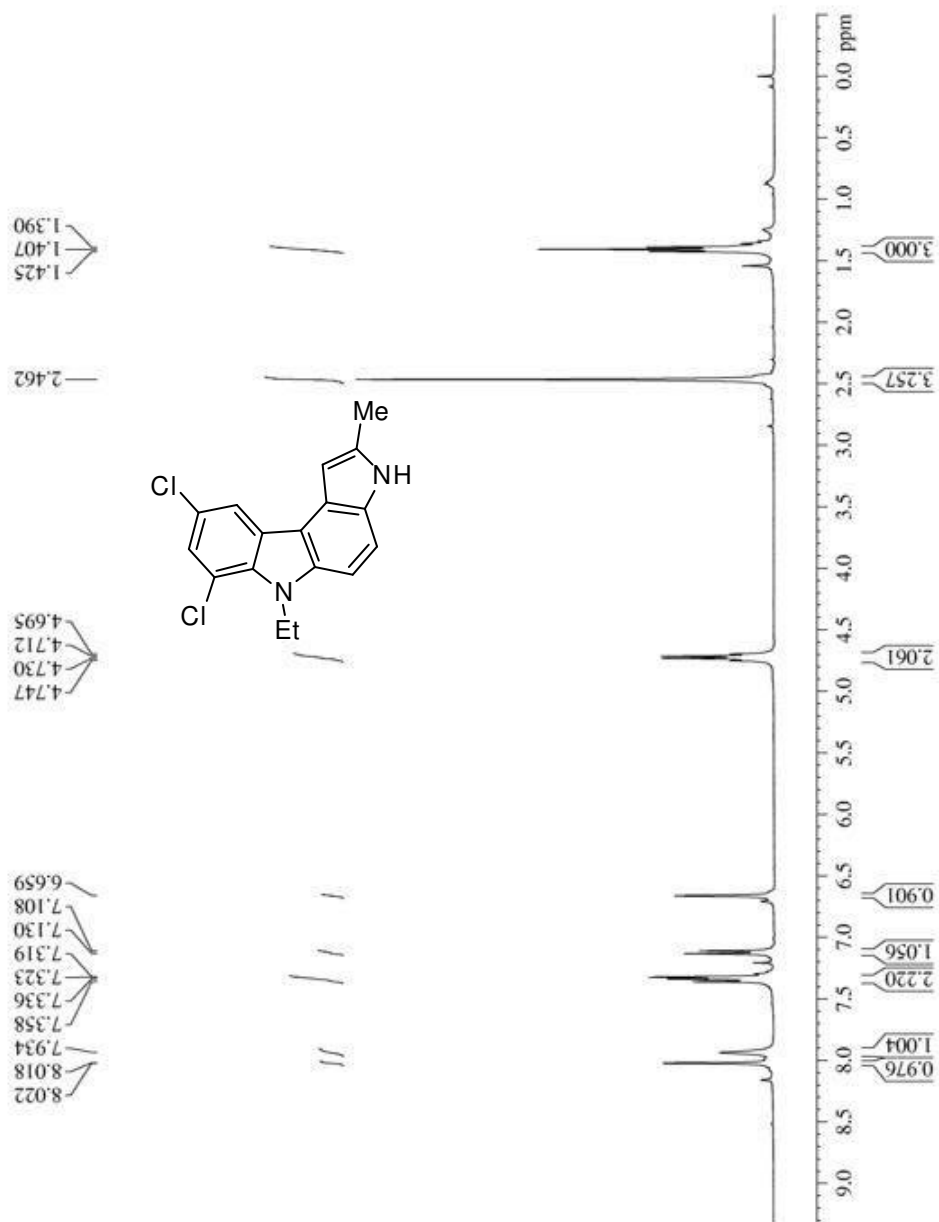

### $^{13}\text{C}$ NMR of 7,9-Dichloro-6-ethyl-2-methyl-3,6-dihydropyrrolo[2,3-*c*]carbazole (3f)

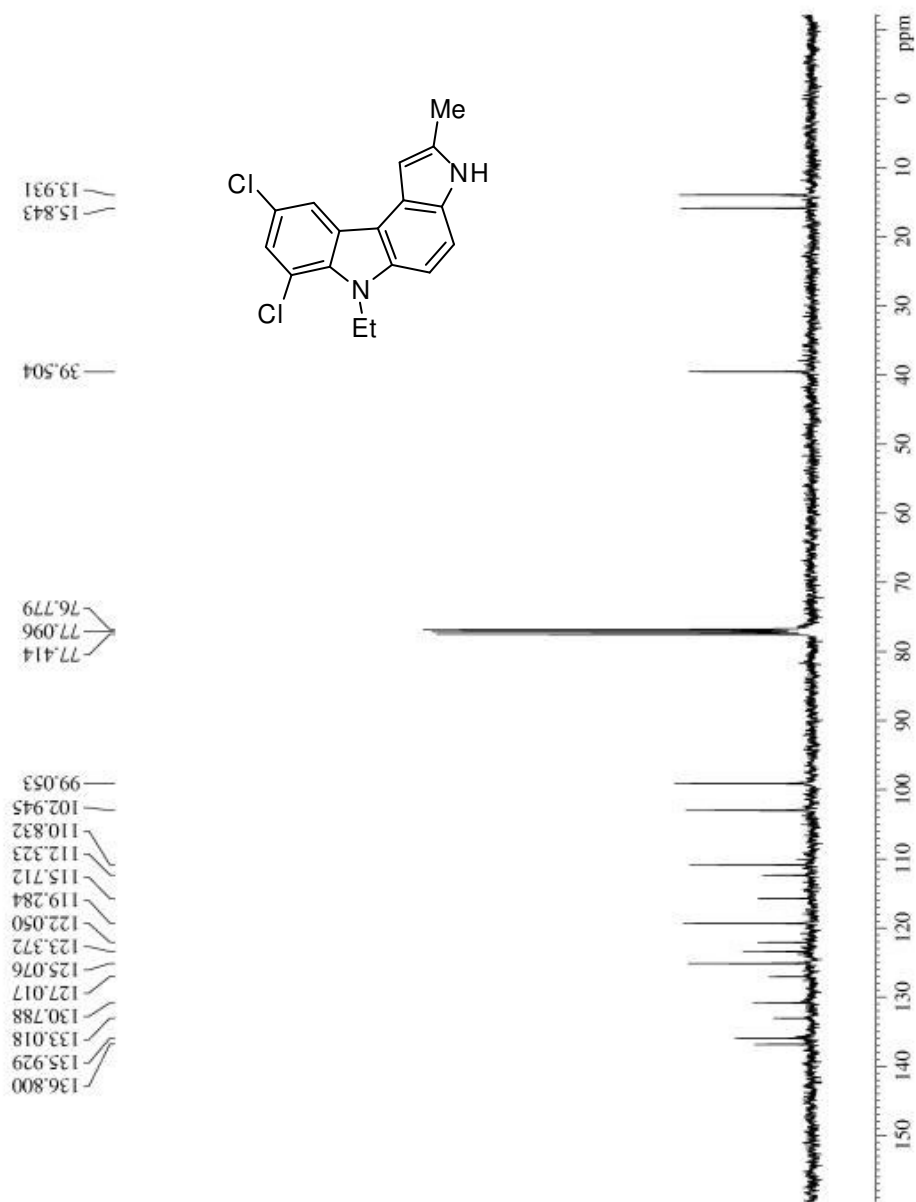

# DEPT of 7,9-Dichloro-6-ethyl-2-methyl-3,6-dihydropyrrolo[2,3-*c*]carbazole (3f)

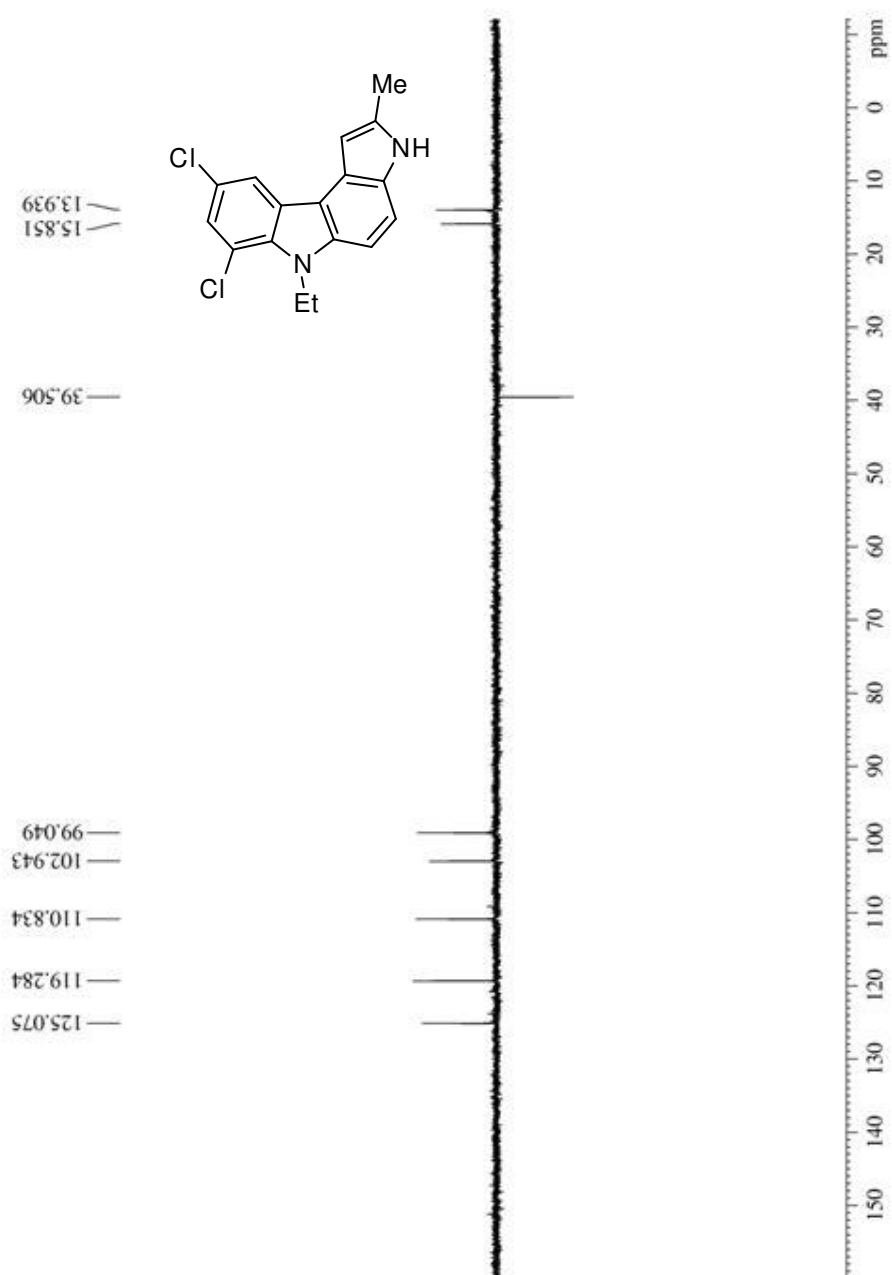

# LC-MS of 7,9-Dichloro-6-ethyl-2-methyl-3,6-dihydropyrrolo[2,3-c]carbazole (3f)

## LCMS-2010A DATA REPORT SCHOOL OF CHEMISTRY UNIVERSITY OF HYDERABAD

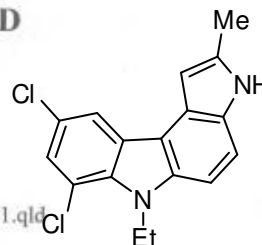

User : Admin  
Sample : VIJI-1177  
Inj. Volume : 5.000  
Data Name : C:\LCMSsolution\User\Data\VIJI-1177-APCI-POS1.qld  
Method Name : C:\LCMSsolution\User\Method\esi.qlm

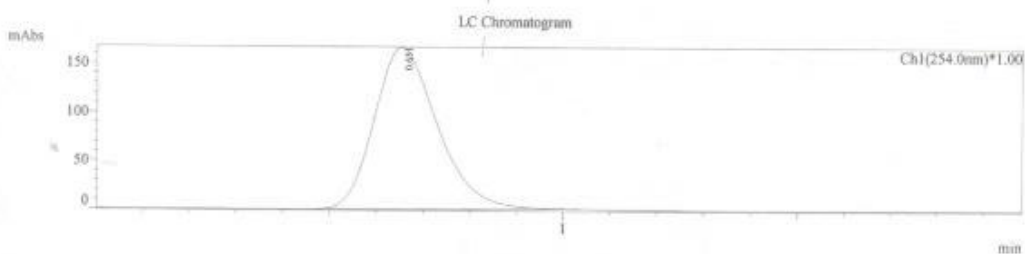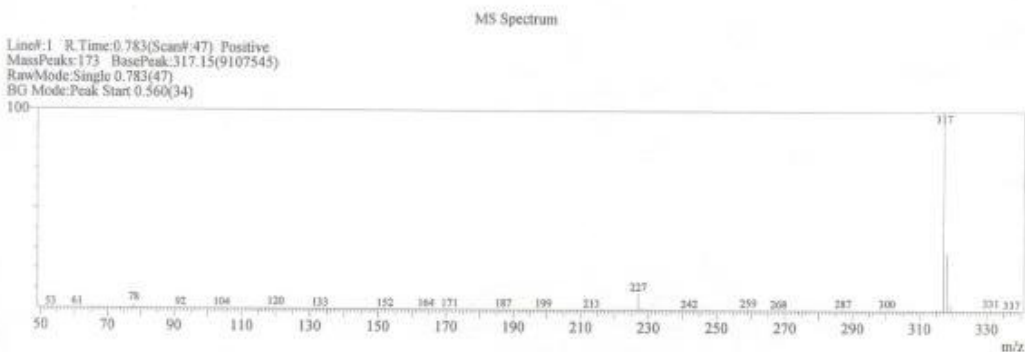

Line#1 R.Time:0.783(Scan#47) Positive  
MassPeaks:173 BasePeak:317.15(9107545)  
RawMode:Single 0.783(47)  
BG Mode:Peak Start 0.560(34)

| Peak# | R.Time | I.Time | F.Time | Area      | Height   | A/H   | Mark | %Total | Name |
|-------|--------|--------|--------|-----------|----------|-------|------|--------|------|
| 1     | 0.783  | 0.560  | 1.043  | 147118259 | 12972574 | 11.34 |      | 100.00 |      |
|       |        |        |        | 147118259 | 12972574 |       |      | 100.00 |      |

Base m/z Base Int.  
317.15 9107545

  
OPERATOR

## Elemental Analysis of 7,9-Dichloro-6-ethyl-2-methyl-3,6-dihydropyrrolo[2,3-*c*]carbazole (3f)

FLASH EA 1112 SERIES CHN REPORT  
SCHOOL OF CHEMISTRY  
UNIVERSITY OF HYDERABAD

Method filename: E:\Program Files\Thermo Finnigan\Eager 300 for EA1112\DATA\Sys\_data\_ex  
Sample ID: VIJ-1177 (# 1)  
Analysis type: UnkNown  
Chromatogram filename: UNK-11072012-1.dat  
Sample weight: 1.127

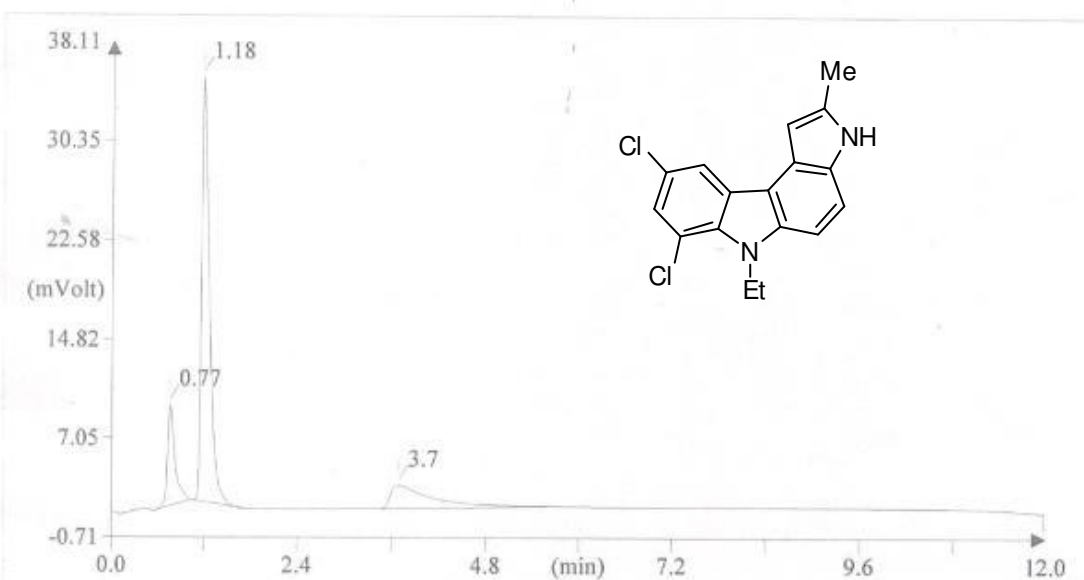

| Element Name | Element % | Ret. Time |
|--------------|-----------|-----------|
| Nitrogen     | 8.96      | 0.77      |
| Carbon       | 64.21     | 1.18      |
| Hydrogen     | 4.51      | 3.70      |

# <sup>1</sup>H NMR of 9-Bromo-6-ethyl-2-methyl-3,6-dihydropyrrolo[2,3-*c*]carbazole (3g)

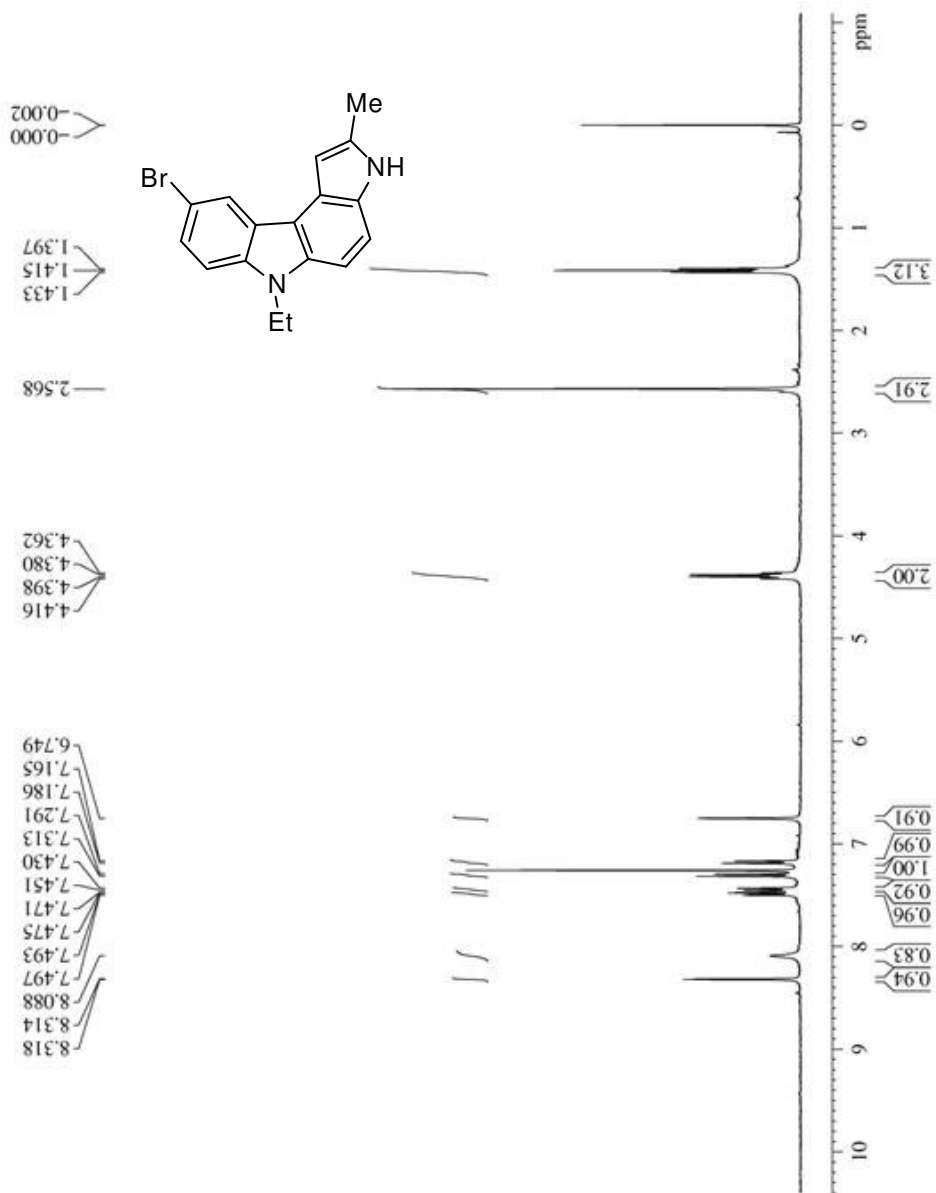



### $^{13}\text{C}$ NMR of 9-Bromo-6-ethyl-2-methyl-3,6-dihydropyrrolo[2,3-*c*]carbazole (3g)

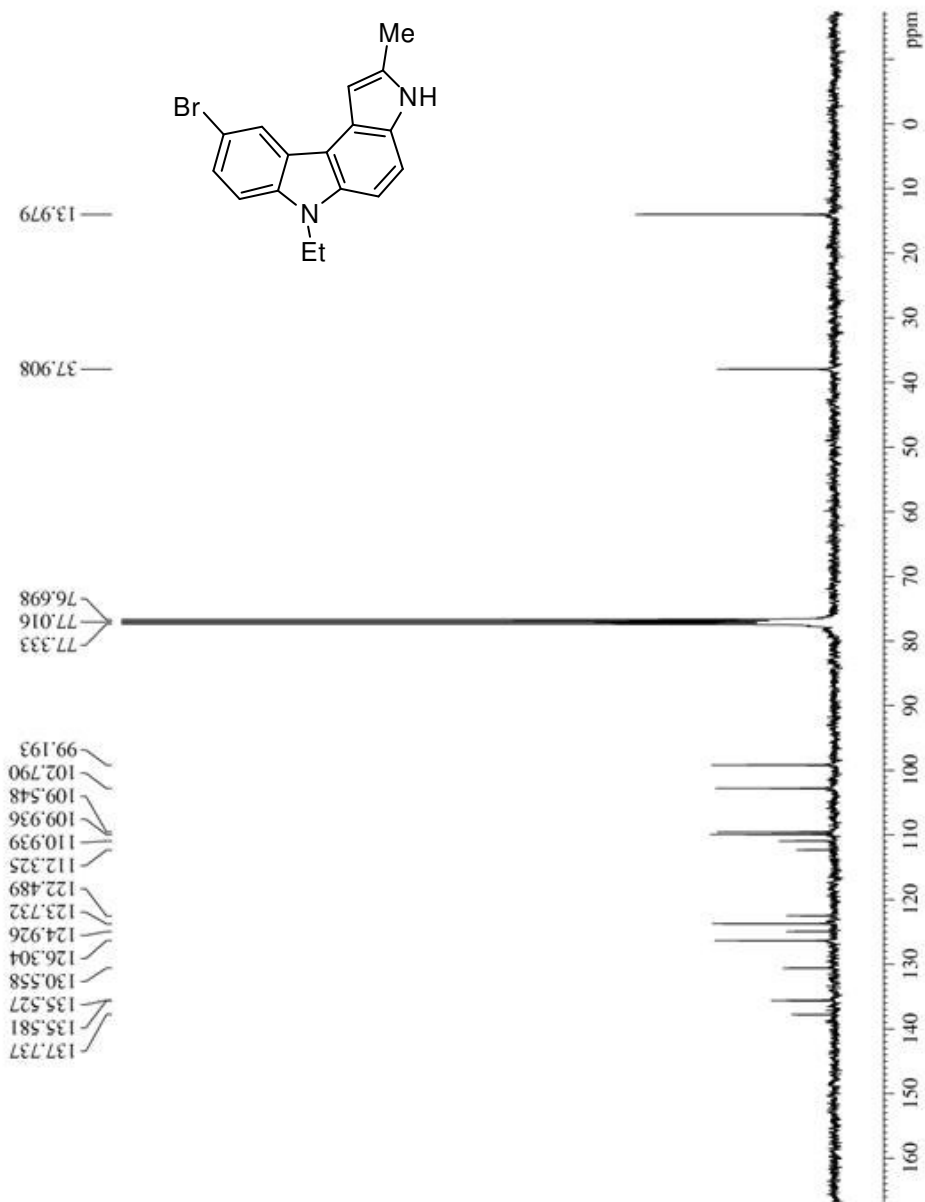

### DEPT of 9-Bromo-6-ethyl-2-methyl-3,6-dihydropyrrolo[2,3-*c*]carbazole (3g)

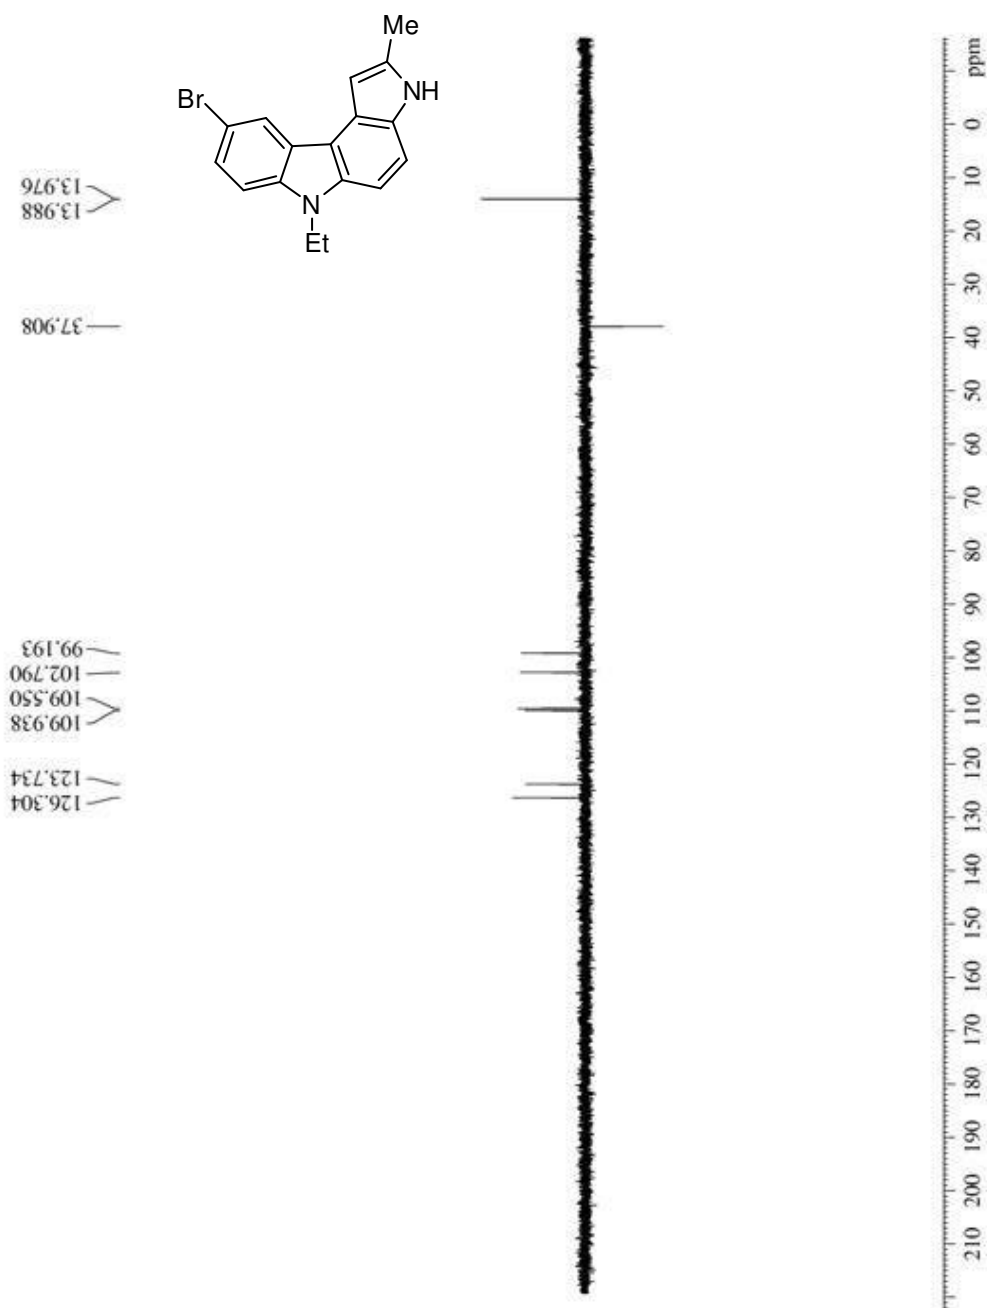

## LC-MS of 9-Bromo-6-ethyl-2-methyl-3,6-dihydropyrrolo[2,3-c]carbazole (3g)

### LCMS-2010A DATA REPORT SCHOOL OF CHEMISTRY UNIVERSITY OF HYDERABAD

User : Admin  
Sample : VIJI-1207  
Inj. Volume : 5.000  
Data Name : C:\LCMSsolution\User\Data\VIJI-1207-APCI-NEG1.qld  
Method Name : C:\LCMSsolution\User\Method\esi.qlm

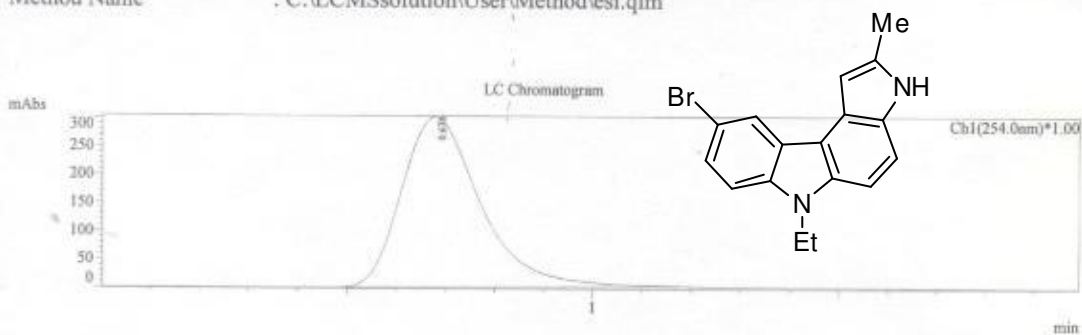

MS Spectrum

Line# 1 R Time 0.810(Scan#:49) Negative  
MassPeaks:223 BasePeak:326.90(314237)  
RawMode:Single 0.810(49)  
BG Mode:Peak Start 0.560(34)

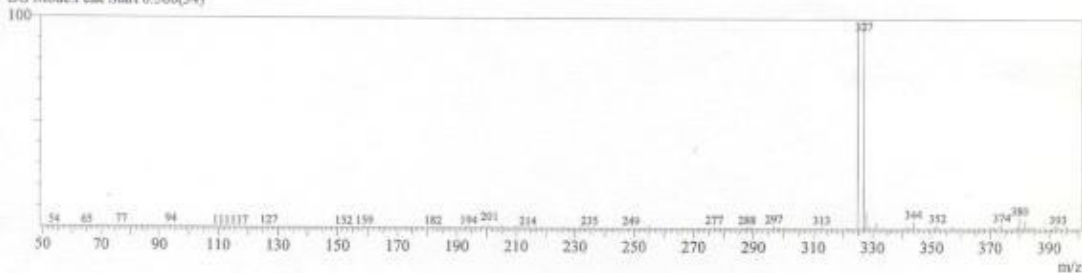

| Peak# | R Time | I Time | F Time | Area     | Height  | A/H   | Mark | %Total | Name |
|-------|--------|--------|--------|----------|---------|-------|------|--------|------|
| 1     | 0.810  | 0.560  | 1.060  | 17636944 | 1622398 | 10.87 |      | 100.00 |      |
|       |        |        |        | 17636944 | 1622398 |       |      | 100.00 |      |

Base m/z Base Int.  
326.90 314237

  
OPERATOR

## Elemental Analysis of 9-Bromo-6-ethyl-2-methyl-3,6-dihydropyrrolo[2,3-c]carbazole (3g)

FLASH EA 1112 SERIES CHN REPORT  
SCHOOL OF CHEMISTRY  
UNIVERSITY OF HYDERABAD

Method filename: E:\Program Files\Thermo Finnigan\Eager 300 for EA1112\DATA\Sys\_data\_ex  
Sample ID: VIJ1-1207 (# 6)  
Analysis type: UnkNown  
Chromatogram filename: UNK-11072012-6.dat  
Sample weight: 1.136

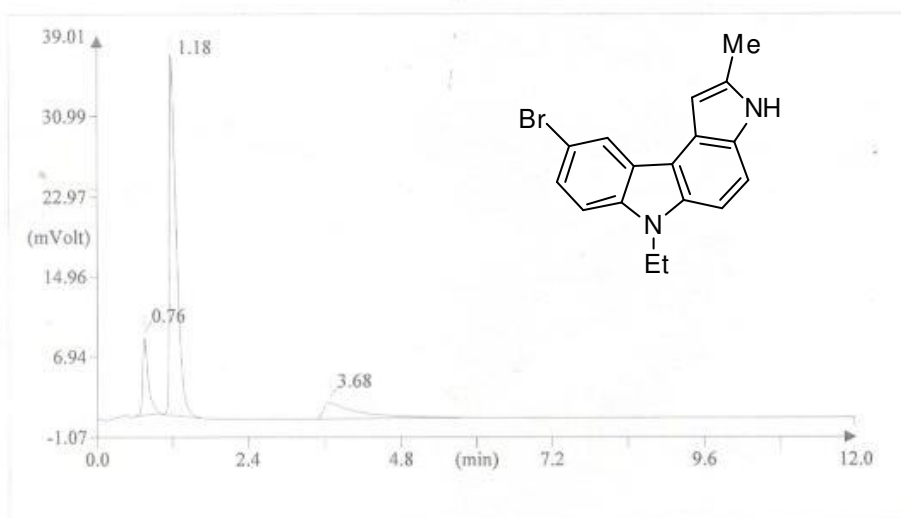

| Element Name | Element % | Ret. Time |
|--------------|-----------|-----------|
| Nitrogen     | 8.45      | 0.76      |
| Carbon       | 62.21     | 1.18      |
| Hydrogen     | 4.71      | 3.68      |

*Handwritten signature*

### <sup>1</sup>H NMR of 6-Ethyl-1,2-dimethyl-3,6-dihydropyrrolo[2,3-c]carbazole (3h)

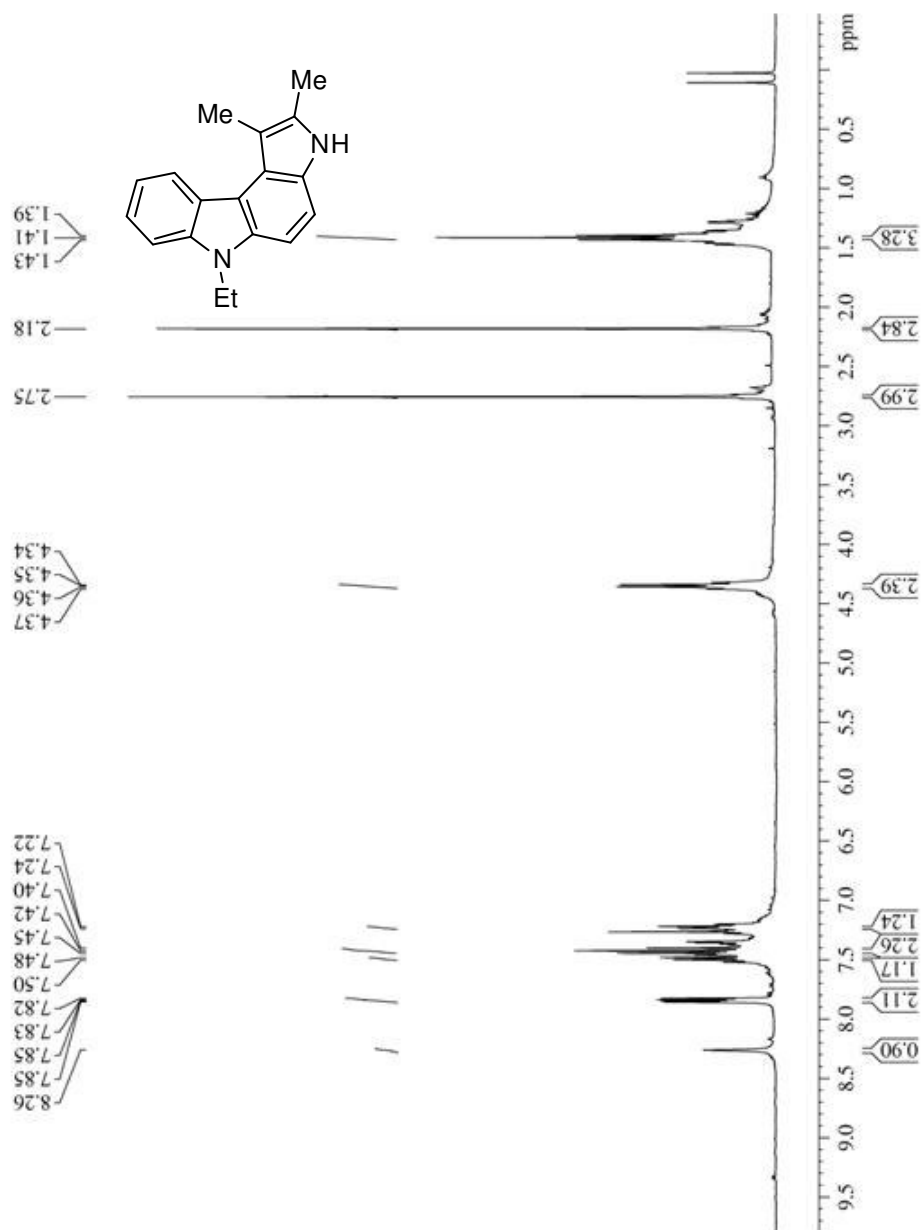

### <sup>13</sup>C NMR of 6-Ethyl-1,2-dimethyl-3,6-dihydropyrrolo[2,3-*c*]carbazole (3h)

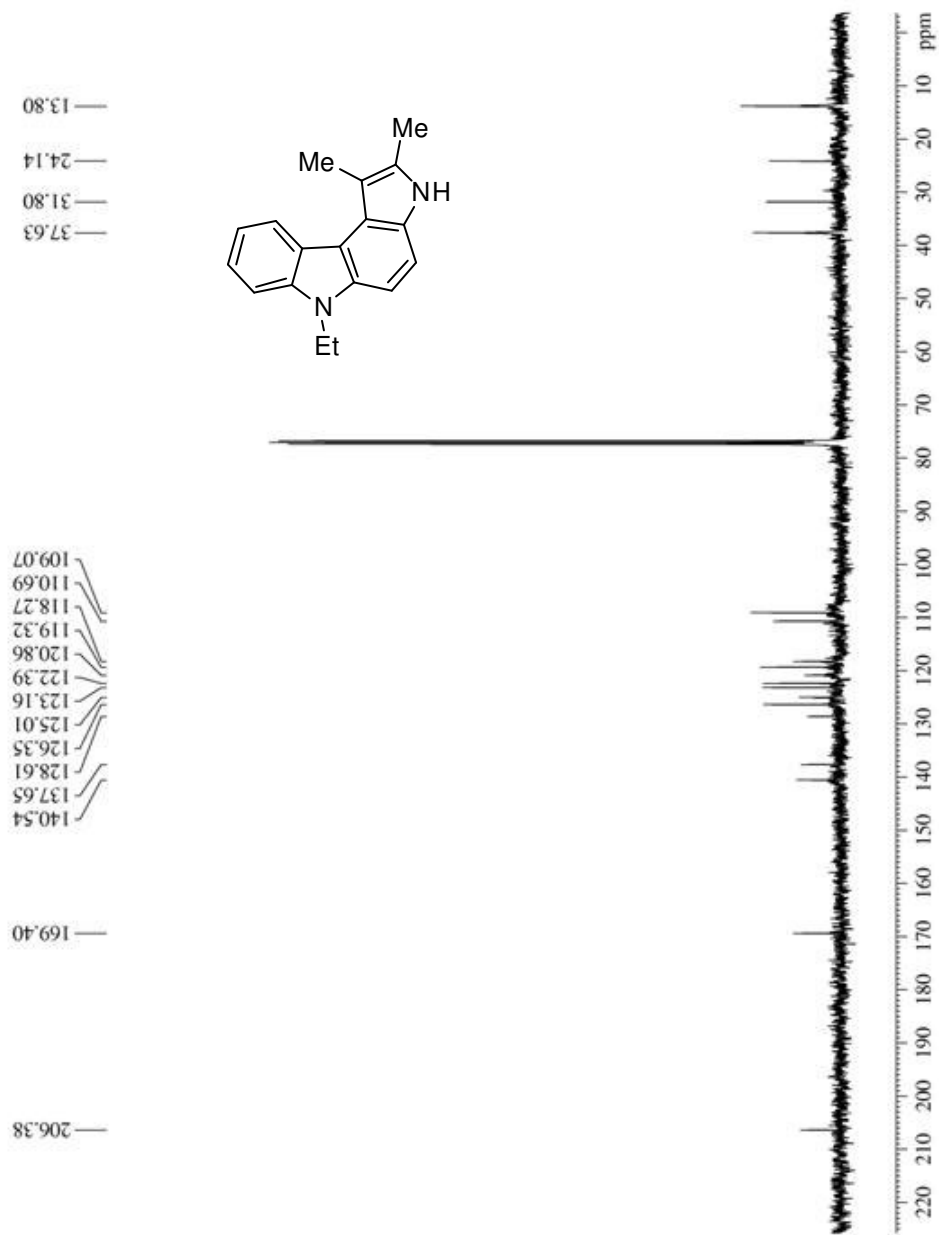

## LC-MS of 6-Ethyl-1,2-dimethyl-3,6-dihydropyrrolo[2,3-c]carbazole (3h)

### LCMS-2010A DATA REPORT SCHOOL OF CHEMISTRY UNIVERSITY OF HYDERABAD

User : Admin  
Sample : VIJI-117  
Inj. Volume : 5.000  
Data Name : C:\LCMSsolution\User\Data\VIJI-117-APCI-POS1.qld  
Method Name : C:\LCMSsolution\User\Method\esi.qlm

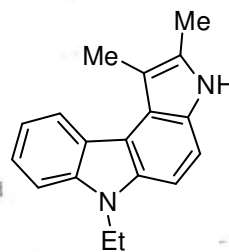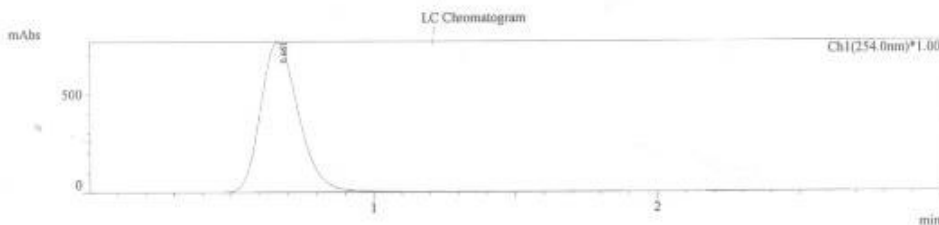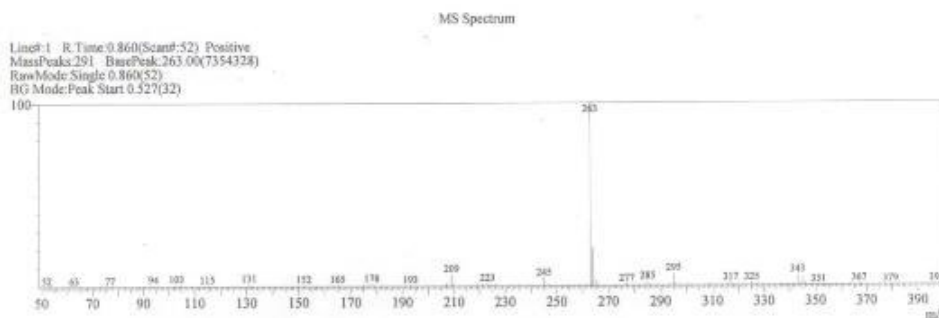

| Peak# | R.Time | I.Time | F.Time | Area      | Height   | A/H   | Mark | %Total | Name | Base m/z | Base Int. |
|-------|--------|--------|--------|-----------|----------|-------|------|--------|------|----------|-----------|
| 1     | 0.860  | 0.527  | 1.143  | 242601387 | 14891611 | 16.29 |      | 100.00 |      | 263.00   | 7354328   |

  
OPERATOR

## Elemental Analysis of 6-Ethyl-1,2-dimethyl-3,6-dihydropyrrolo[2,3-c]carbazole (3h)

FLASH EA 1112 SERIES CHN REPORT  
SCHOOL OF CHEMISTRY  
UNIVERSITY OF HYDERABAD

Method filename: E:\Program Files\Thermo Finnigan\Eager 300 for EA1112\DATA\Sys\_data\_ex  
Sample ID: VIJI-117 (# 66)  
Analysis type: UnkNown  
Chromatogram filename: UNK-17102011-16.dat  
Sample weight: .991

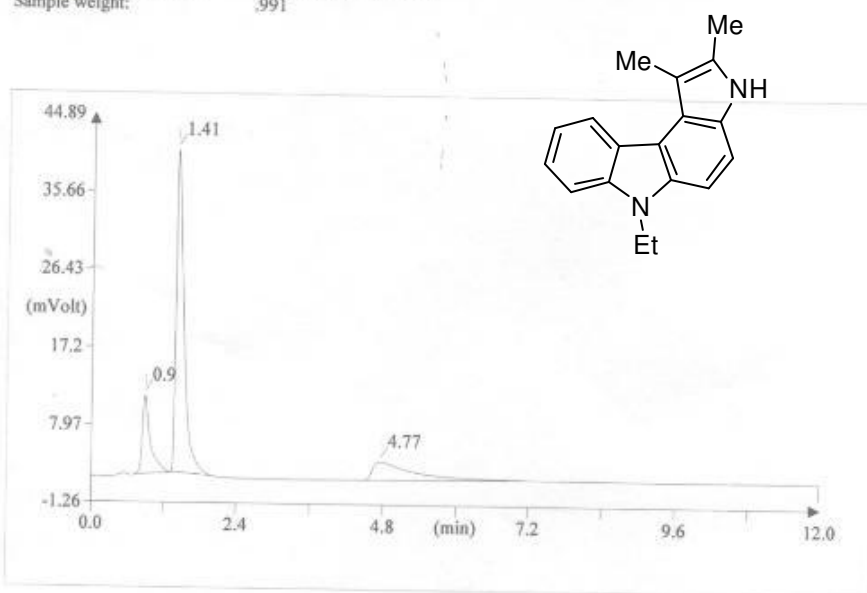

| Element Name | Element % | Ret. Time |
|--------------|-----------|-----------|
| Nitrogen     | 10.58     | 0.90      |
| Carbon       | 82.25     | 1.41      |
| Hydrogen     | 6.98      | 4.77      |

*Signature*



### <sup>1</sup>H NMR of 6-Benzyl-1,2-dimethyl-3,6-dihydropyrrolo[2,3-c]carbazole (3i)

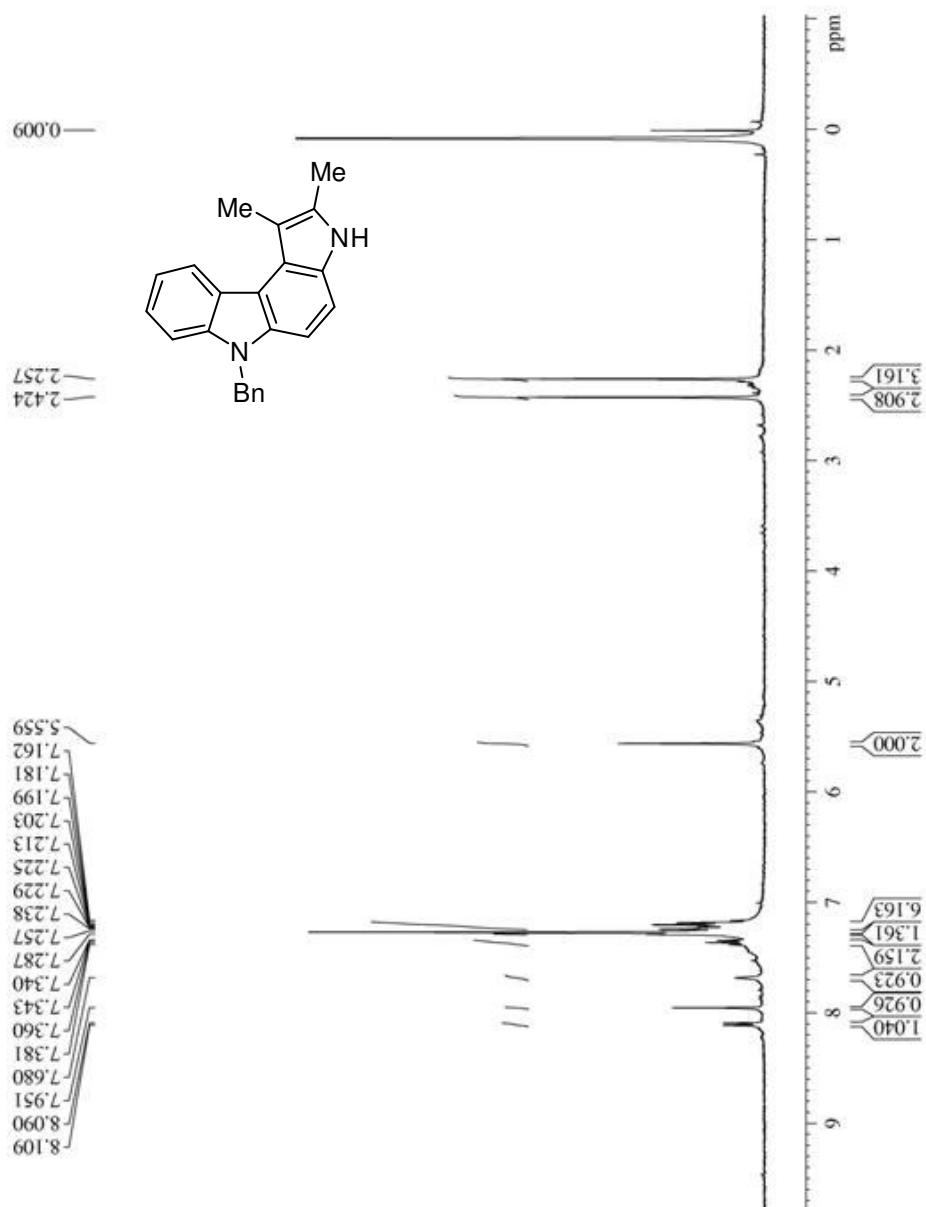

### $^{13}\text{C}$ NMR of 6-Benzyl-1,2-dimethyl-3,6-dihydropyrrolo[2,3-*c*]carbazole (3i)

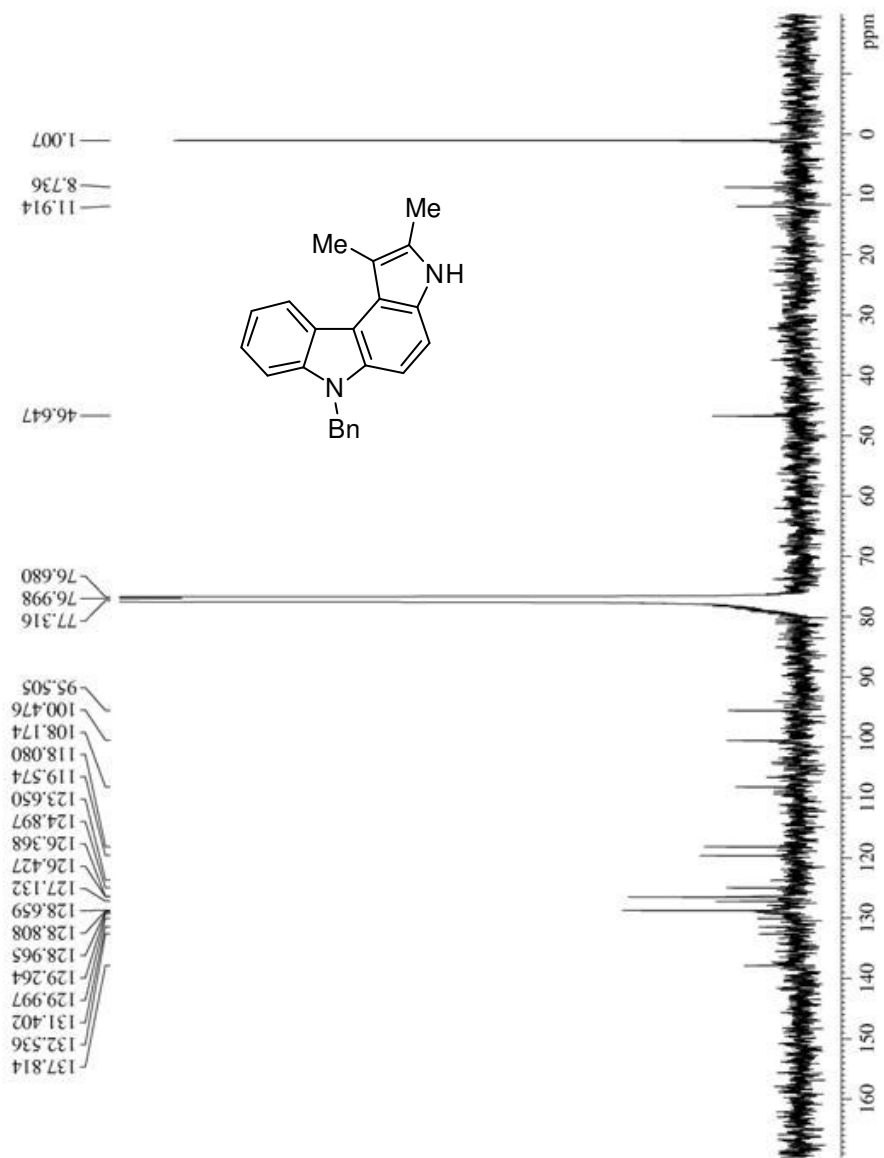

## LC-MS of 6-Benzyl-1,2-dimethyl-3,6-dihydropyrrolo[2,3-c]carbazole (3i)

### LCMS-2010A DATA REPORT SCHOOL OF CHEMISTRY UNIVERSITY OF HYDERABAD

User : Admin  
Sample : VIJI-1325  
Inj. Volume : 5.000  
Data Name : C:\LCMSsolution\User\Data\VIJI-1325-APCI-POS\1325.D  
Method Name : C:\LCMSsolution\User\Method\esi.q1m

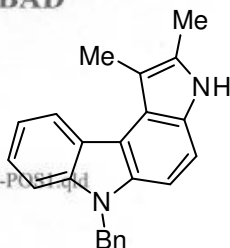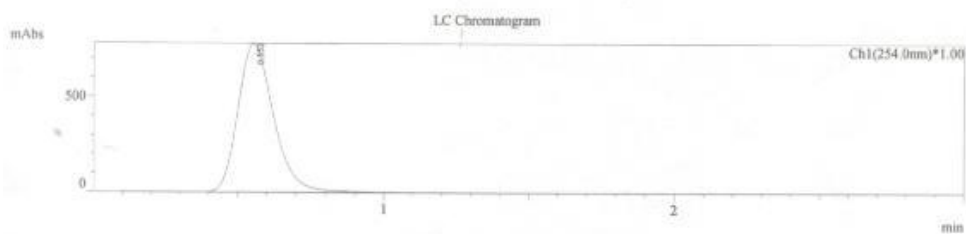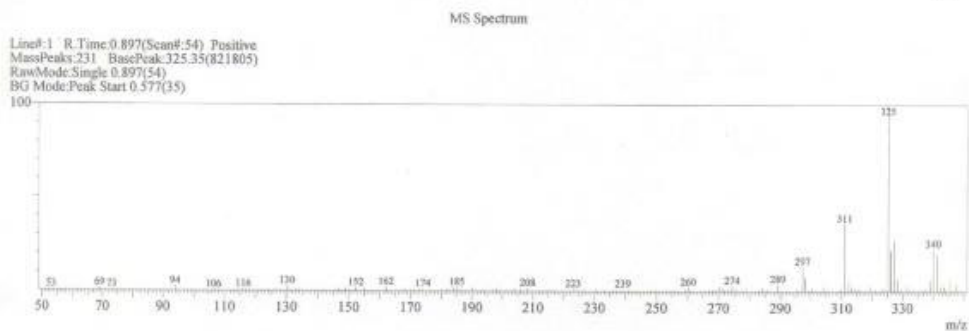

| Peak# | R.Time | I.Time | F.Time | Area     | Height  | A/H  | Mark | %Total | Name | Base m/z | Base Int. |
|-------|--------|--------|--------|----------|---------|------|------|--------|------|----------|-----------|
| 1     | 0.897  | 0.577  | 1.043  | 58282470 | 6585609 | 8.84 |      | 100.00 |      | 325.35   | 821805    |
|       |        |        |        | 58282470 | 6585609 |      |      | 100.00 |      |          |           |

OPERATOR

# Elemental Analysis of 6-Benzyl-1,2-dimethyl-3,6-dihydropyrrolo[2,3-c]carbazole (3i)

FLASH EA 1112 SERIES CHN REPORT  
SCHOOL OF CHEMISTRY  
UNIVERSITY OF HYDERABAD

Method filename: E:\Program Files\Thermo Finnigan\Eager 300 for EA1112\DATA\Sys\_data\_ex  
Sample ID: VIJ-1325 (# 8)  
Analysis type: UnkNown  
Chromatogram filename: UNK-11072012-8.dat  
Sample weight: 1.246

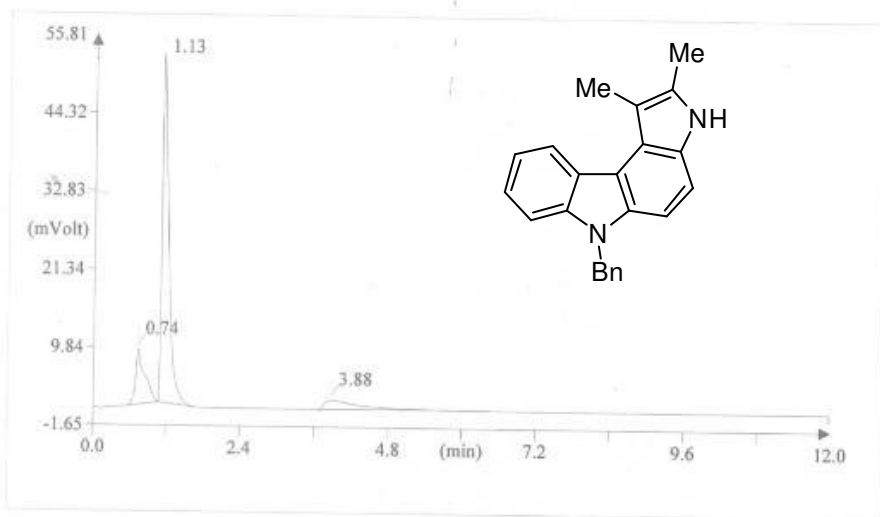

| Element Name | Element % | Ret. Time |
|--------------|-----------|-----------|
| Nitrogen     | 8.56      | 0.74      |
| Carbon       | 85.02     | 1.13      |
| Hydrogen     | 6.28      | 3.88      |

*BL*

# <sup>1</sup>H NMR of 6-Ethyl-2-methyl-1-phenyl-3,6-dihydropyrrolo[2,3-c]carbazole (3j)

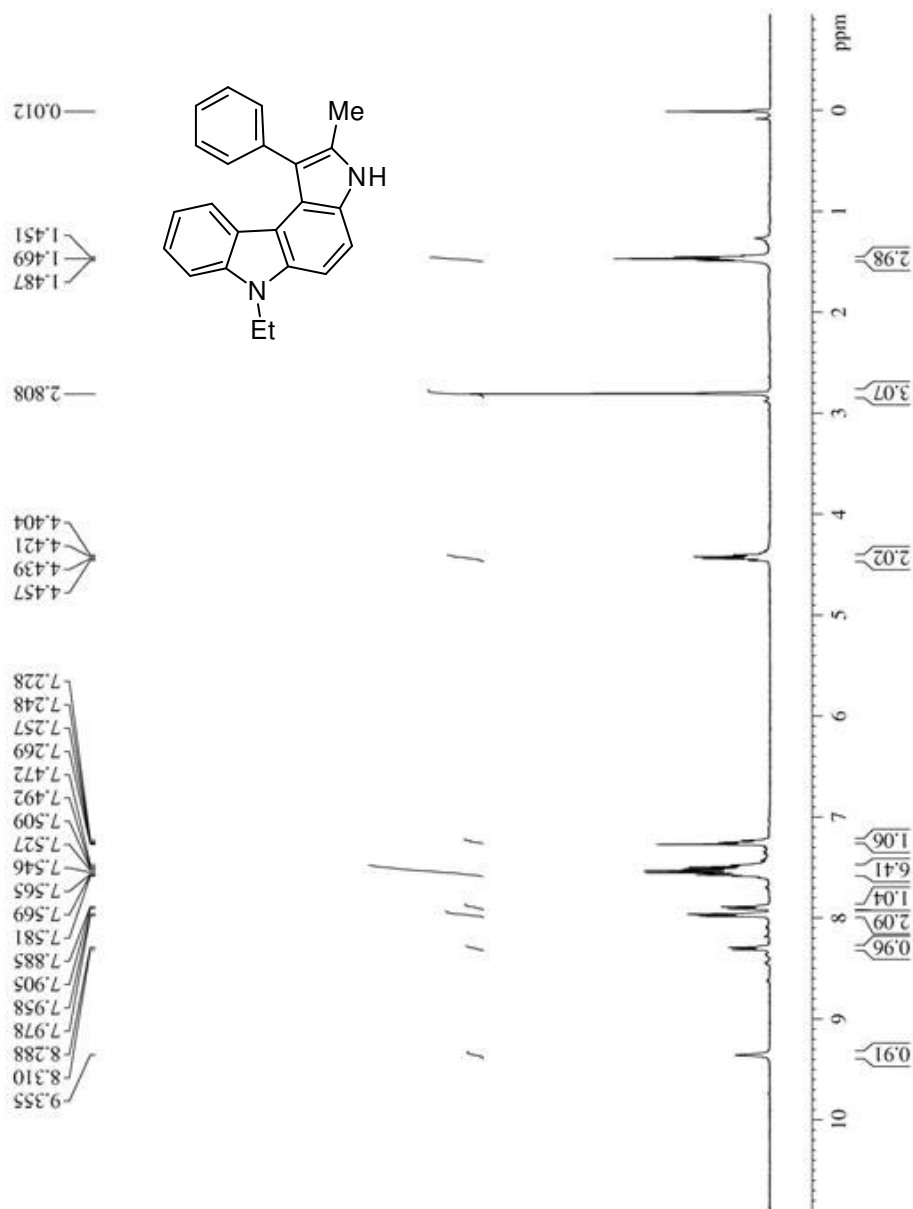

### <sup>13</sup>C NMR of 6-Ethyl-2-methyl-1-phenyl-3,6-dihydropyrrolo[2,3-c]carbazole (3j)

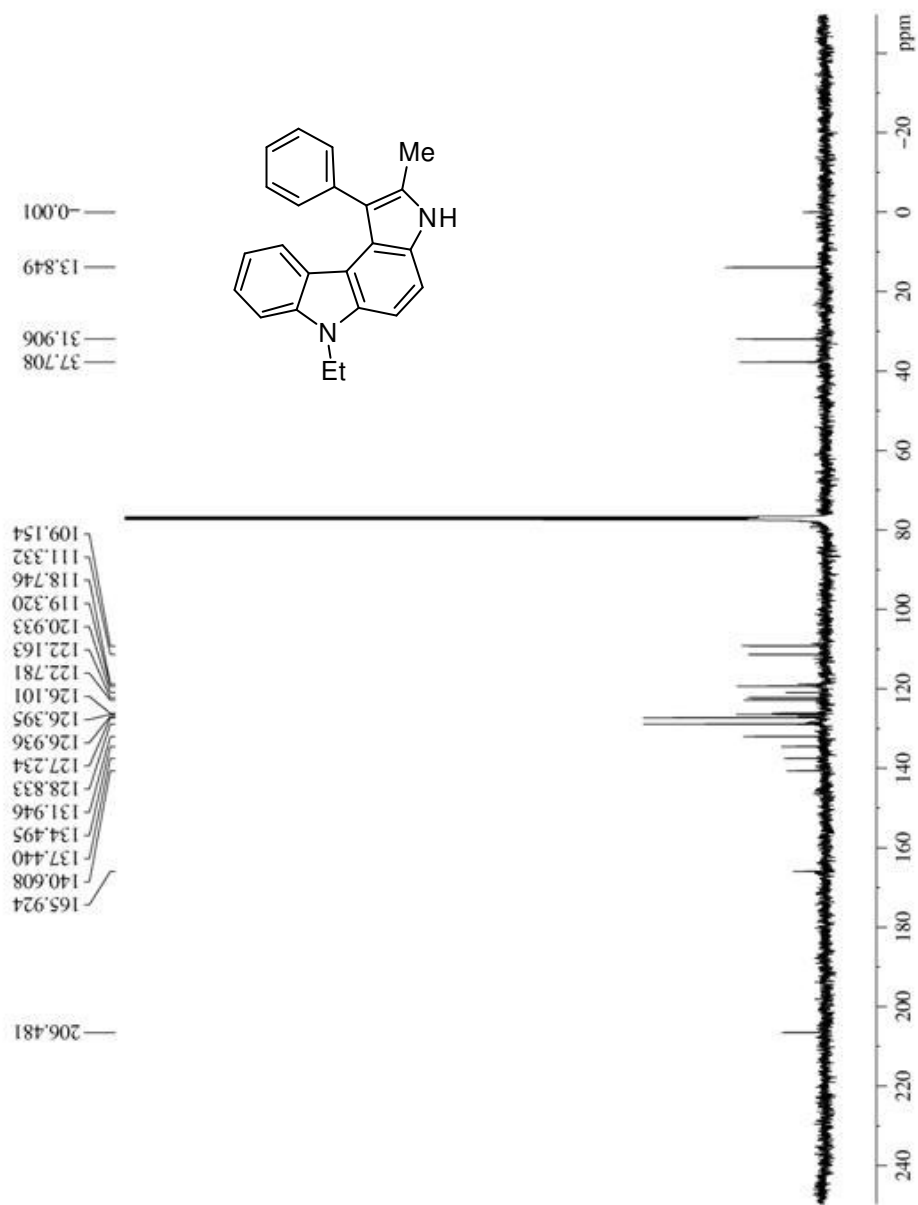

## LC-MS of 6-Ethyl-2-methyl-1-phenyl-3,6-dihydropyrrolo[2,3-c]carbazole (3j)

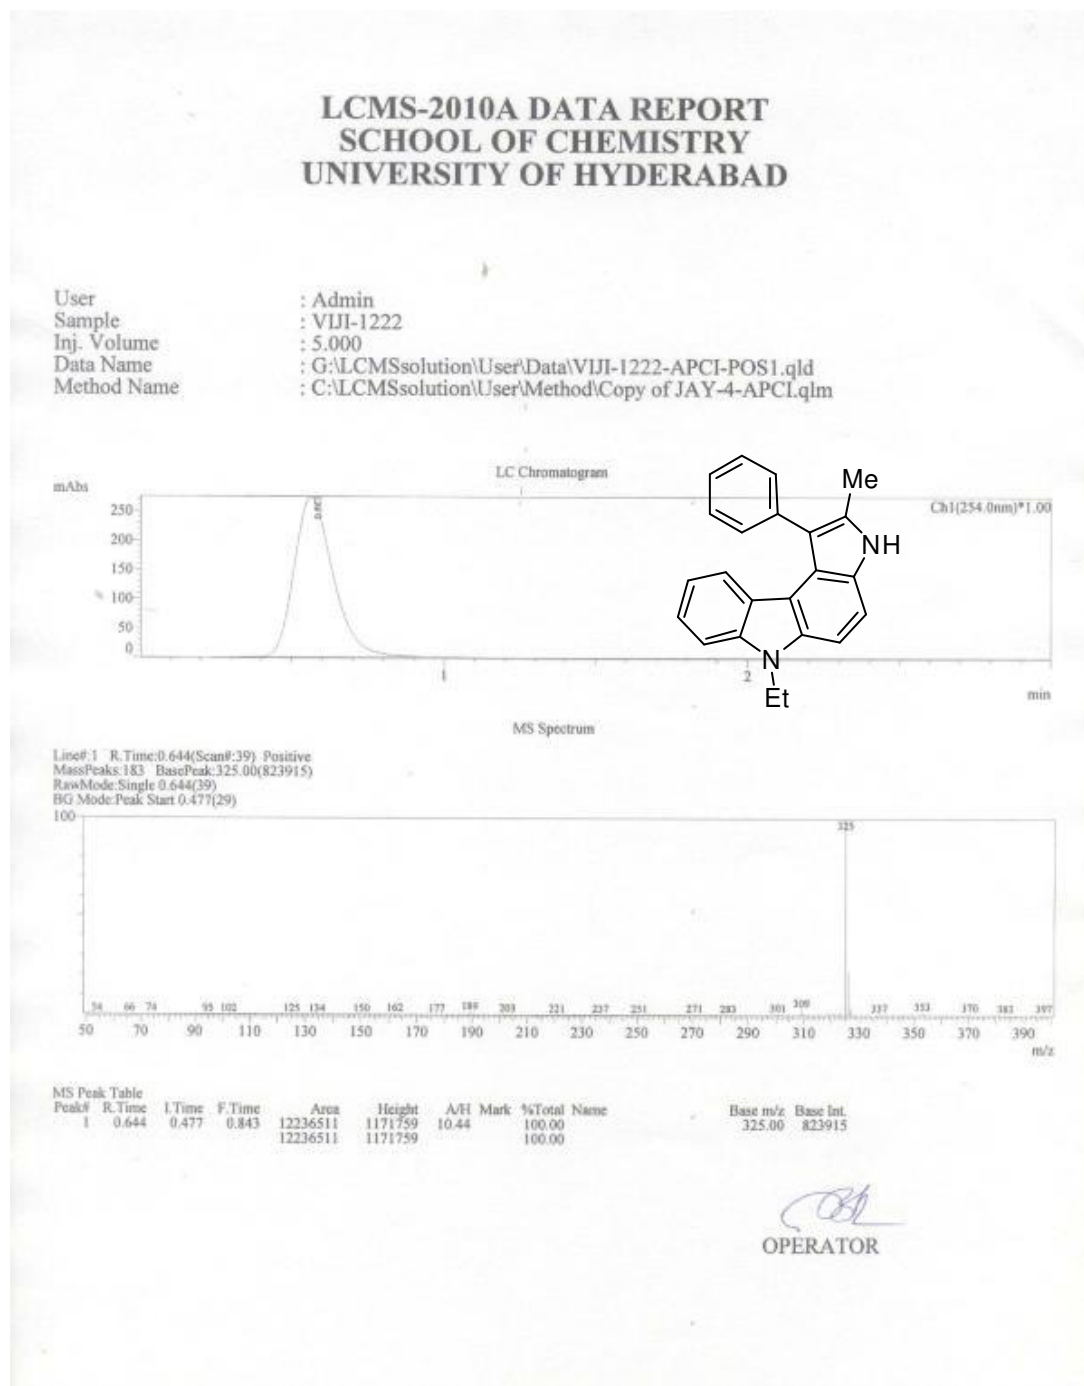

## Elemental Analysis of 6-Ethyl-2-methyl-1-phenyl-3,6-dihydropyrrolo[2,3-c]carbazole (3j)

FLASH EA 1112 SERIES CHN REPORT  
SCHOOL OF CHEMISTRY  
UNIVERSITY OF HYDERABAD

Method filename: E:\Program Files\Thermo Finnigan\Eager 300 for EA1112\DATA\Sys\_data\_ex  
Sample ID: VIJI-1222 (# 5)  
Analysis type: UnkNown  
Chromatogram filename: UNK-11072012-5.dat  
Sample weight: 1.263

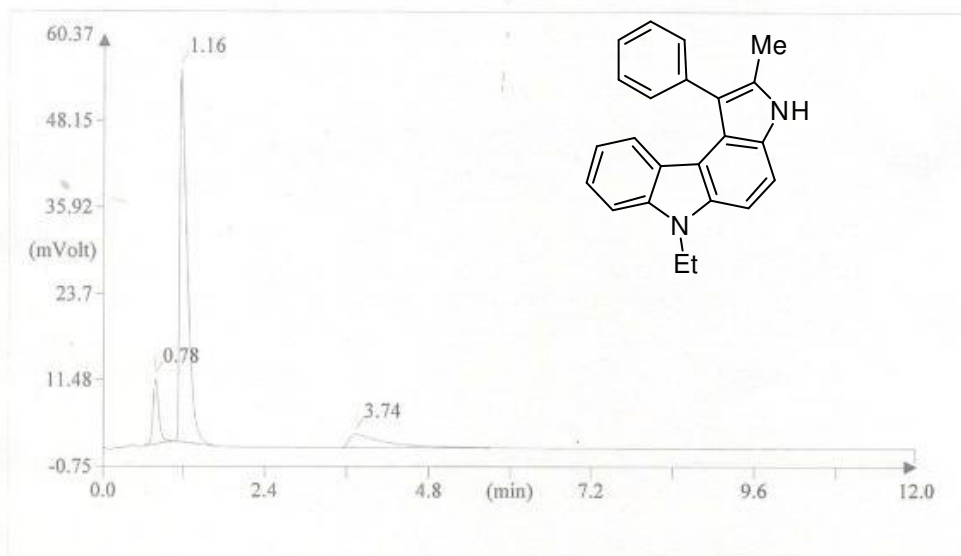

| Element Name | Element % | Ret. Time |
|--------------|-----------|-----------|
| Nitrogen     | 8.81      | 0.78      |
| Carbon       | 85.26     | 1.16      |
| Hydrogen     | 6.15      | 3.74      |

*Handwritten signature*



# $^1\text{H}$ NMR of 2-Benzyl-6-ethyl-3,6-dihydropyrrolo[2,3-*c*]carbazole (3k)

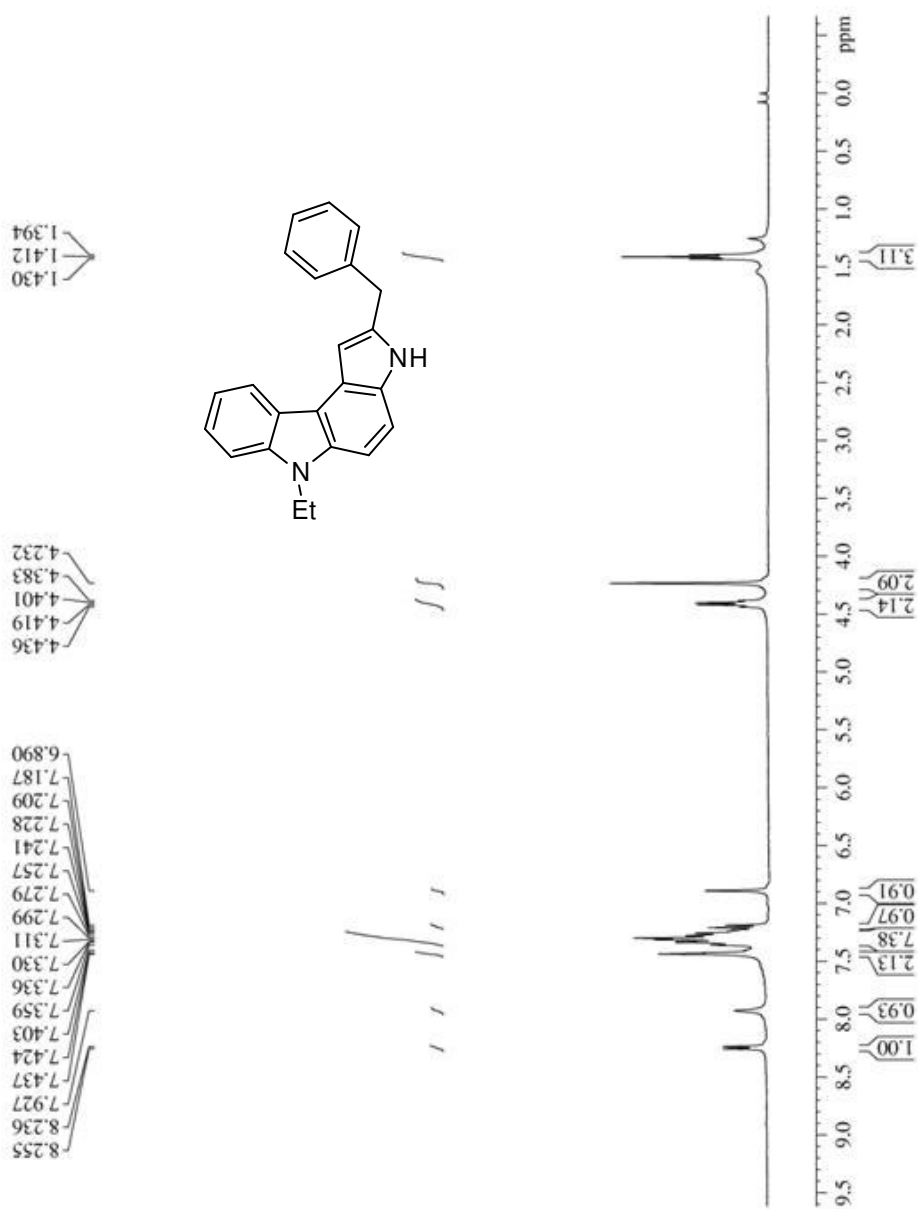

### $^{13}\text{C}$ NMR of 2-Benzyl-6-ethyl-3,6-dihydropyrrolo[2,3-*c*]carbazole (3k)

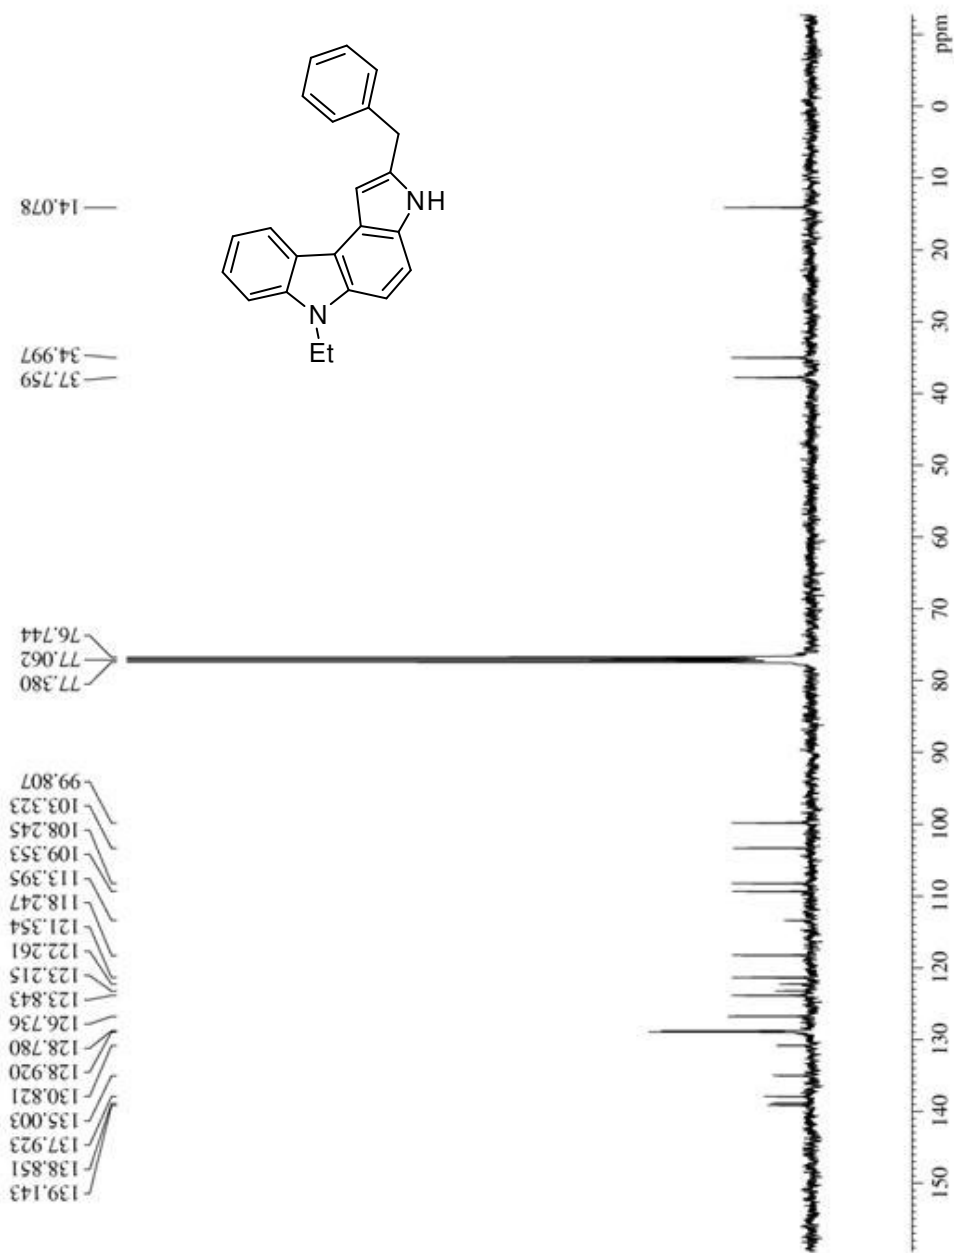

### DEPT of 2-Benzyl-6-ethyl-3,6-dihydropyrrolo[2,3-*c*]carbazole (3k)

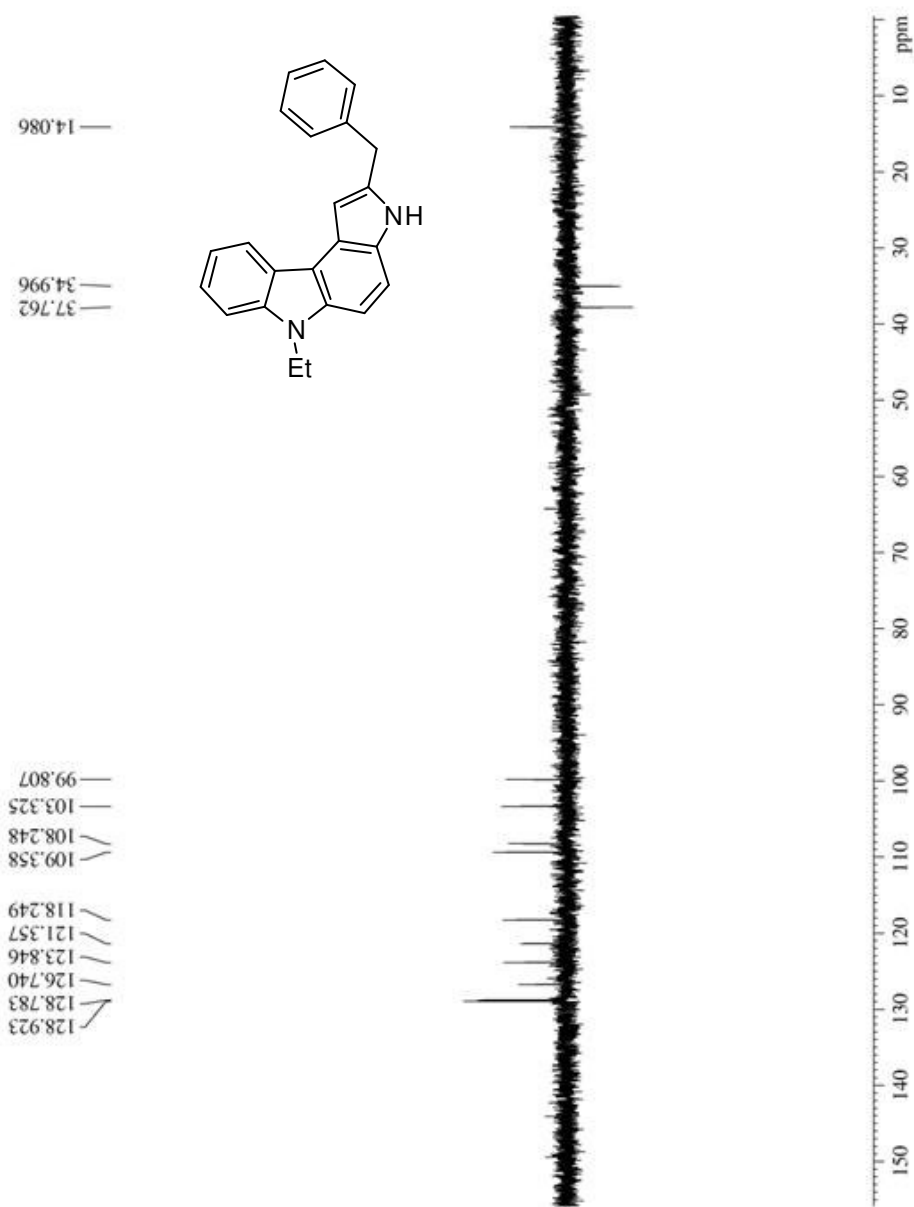

## LC-MS of 2-Benzyl-6-ethyl-3,6-dihydropyrrolo[2,3-c]carbazole (3k)

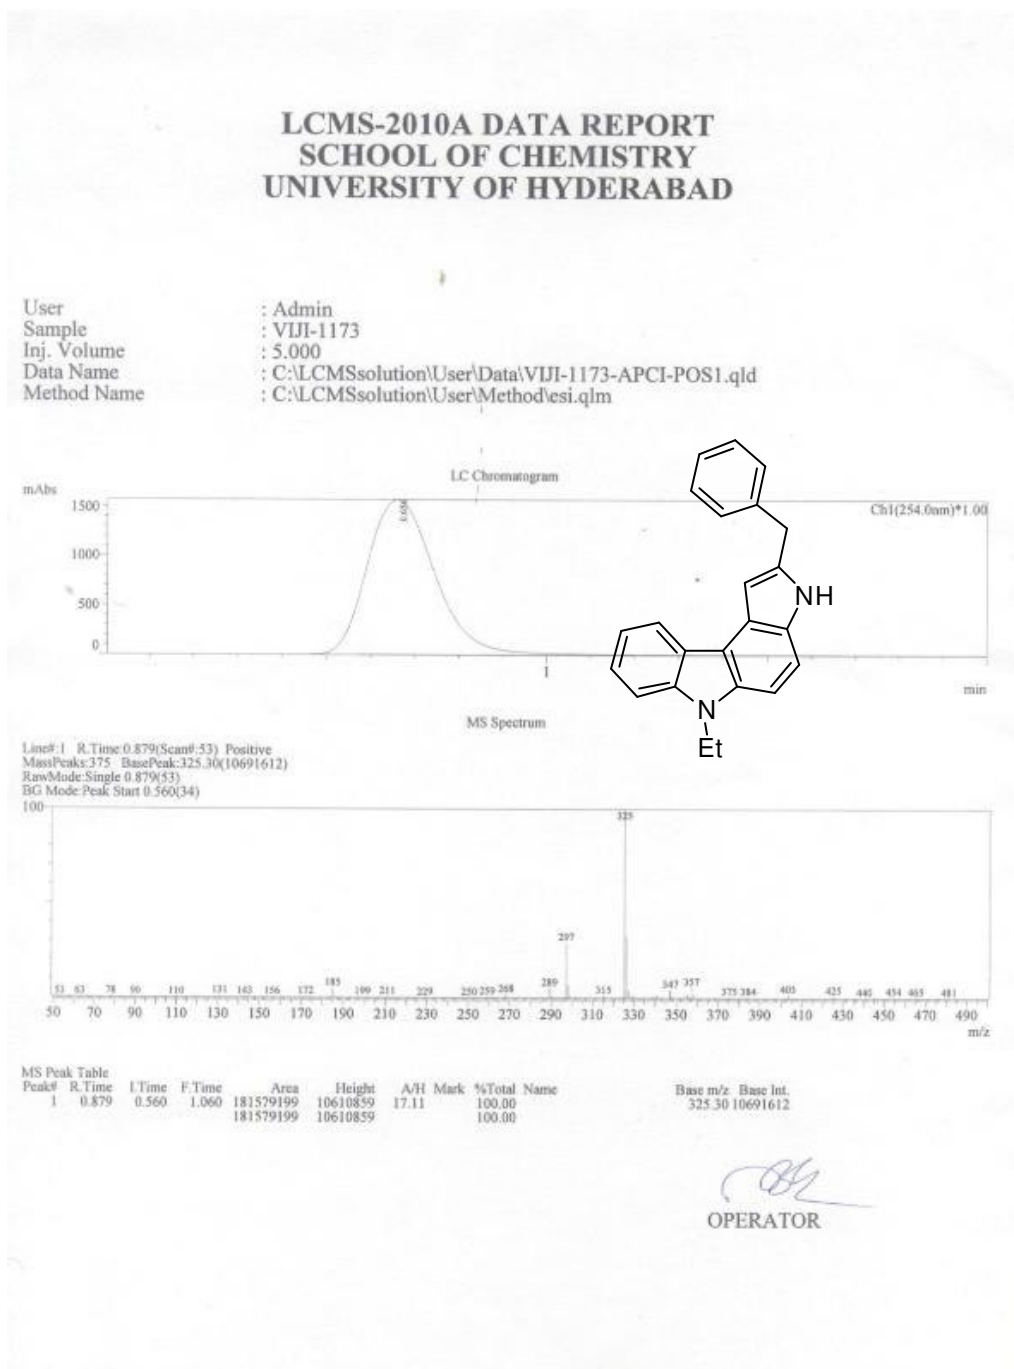

## Elemental Analysis of 2-Benzyl-6-ethyl-3,6-dihydropyrrolo[2,3-c]carbazole (3k)

FLASH EA 1112 SERIES CHN REPORT  
SCHOOL OF CHEMISTRY  
UNIVERSITY OF HYDERABAD

Method filename: E:\Program Files\Thermo Finnigan\Eager 300 for EA1112\DATA\Sys\_data\_ex  
Sample ID: VJL-1173 (# 17)  
Analysis type: UnkNown  
Chromatogram filename: UNK-11072012-17.dat  
Sample weight: 1.119

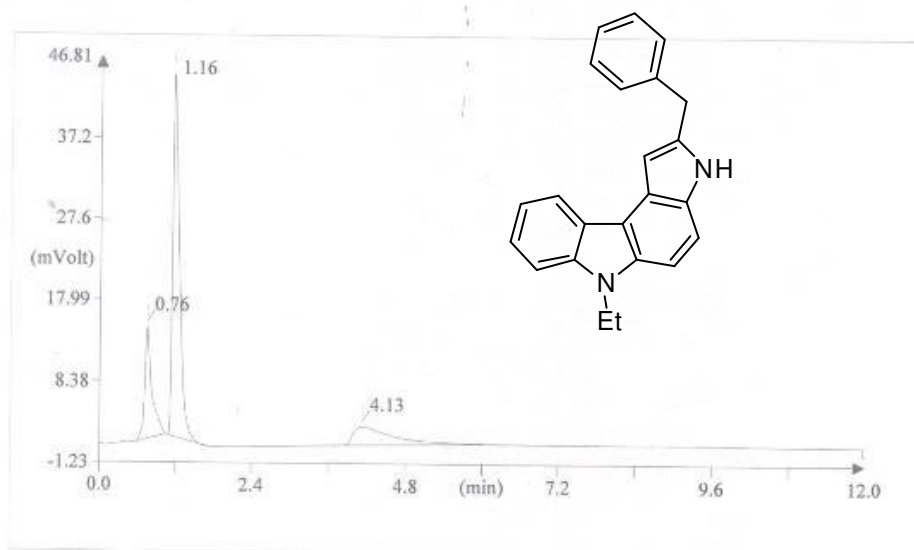

| Element Name | Element % | Ret. Time |
|--------------|-----------|-----------|
| Nitrogen     | 8.71      | 0.76      |
| Carbon       | 85.26     | 1.16      |
| Hydrogen     | 6.15      | 4.13      |

*OBK*

### <sup>1</sup>H NMR of 2-Benzyl-6-butyl-3,6-dihydropyrrolo[2,3-c]carbazole (3l)

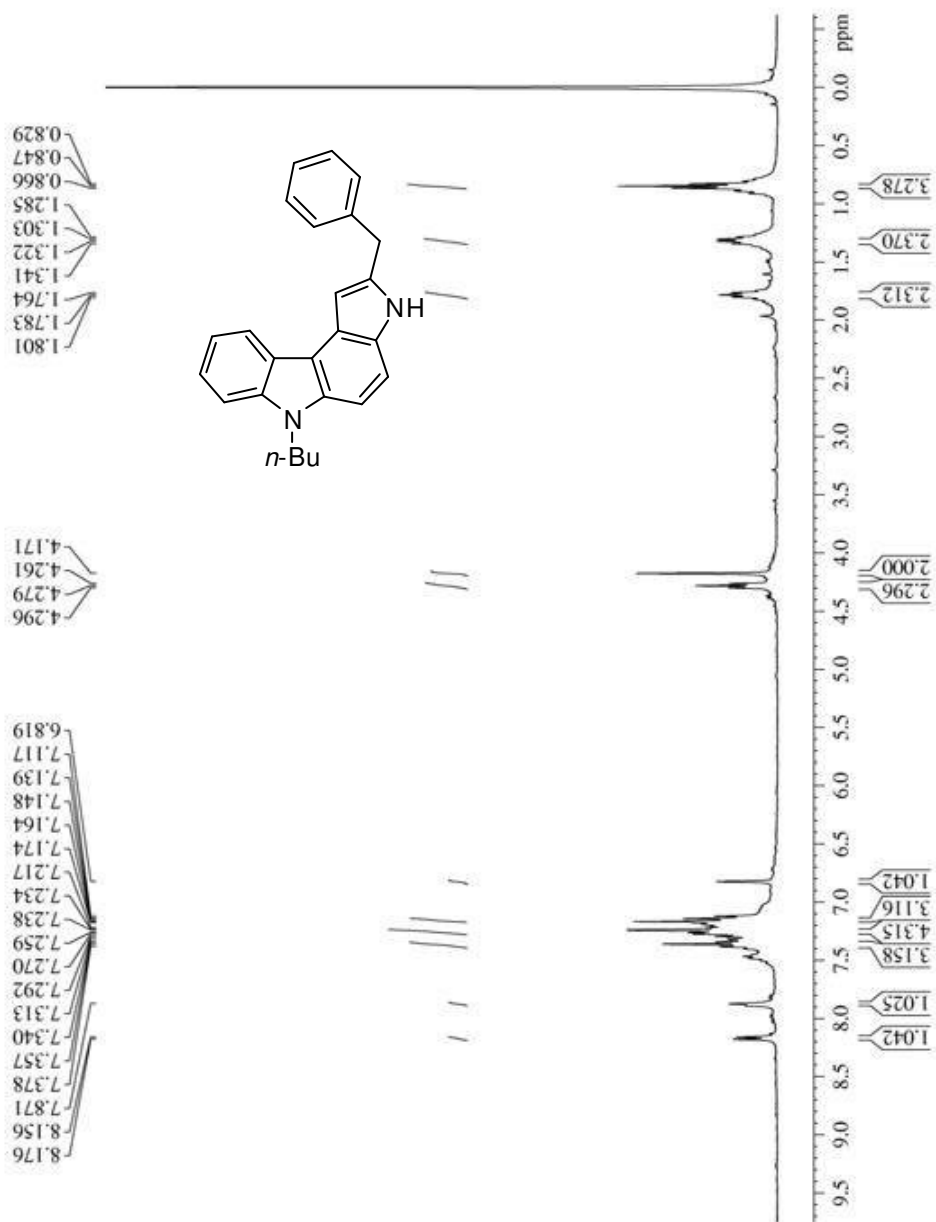

### $^{13}\text{C}$ NMR of 2-Benzyl-6-butyl-3,6-dihydropyrrolo[2,3-*c*]carbazole (3l)

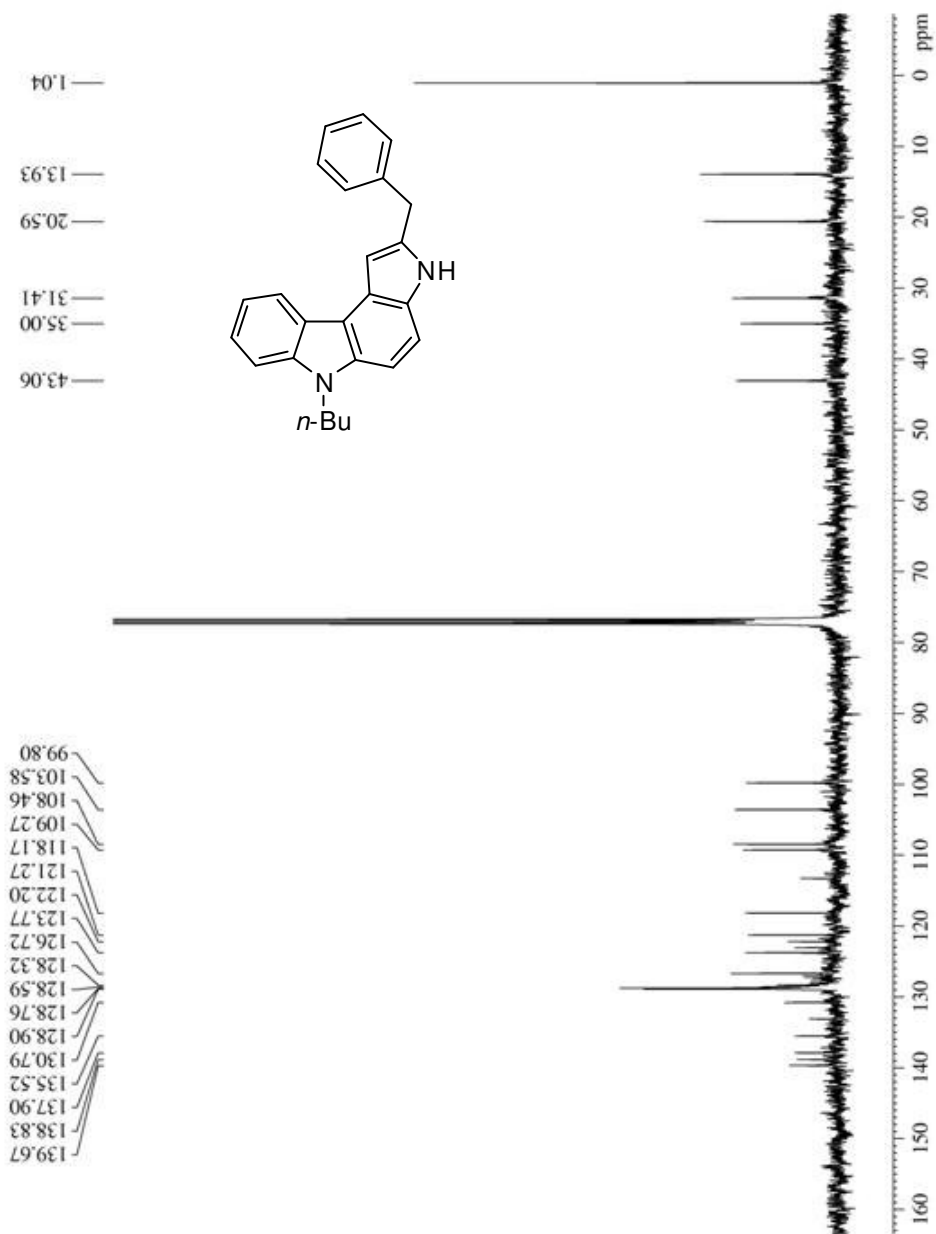

### DEPT of 2-Benzyl-6-butyl-3,6-dihydropyrrolo[2,3-*c*]carbazole (3l)

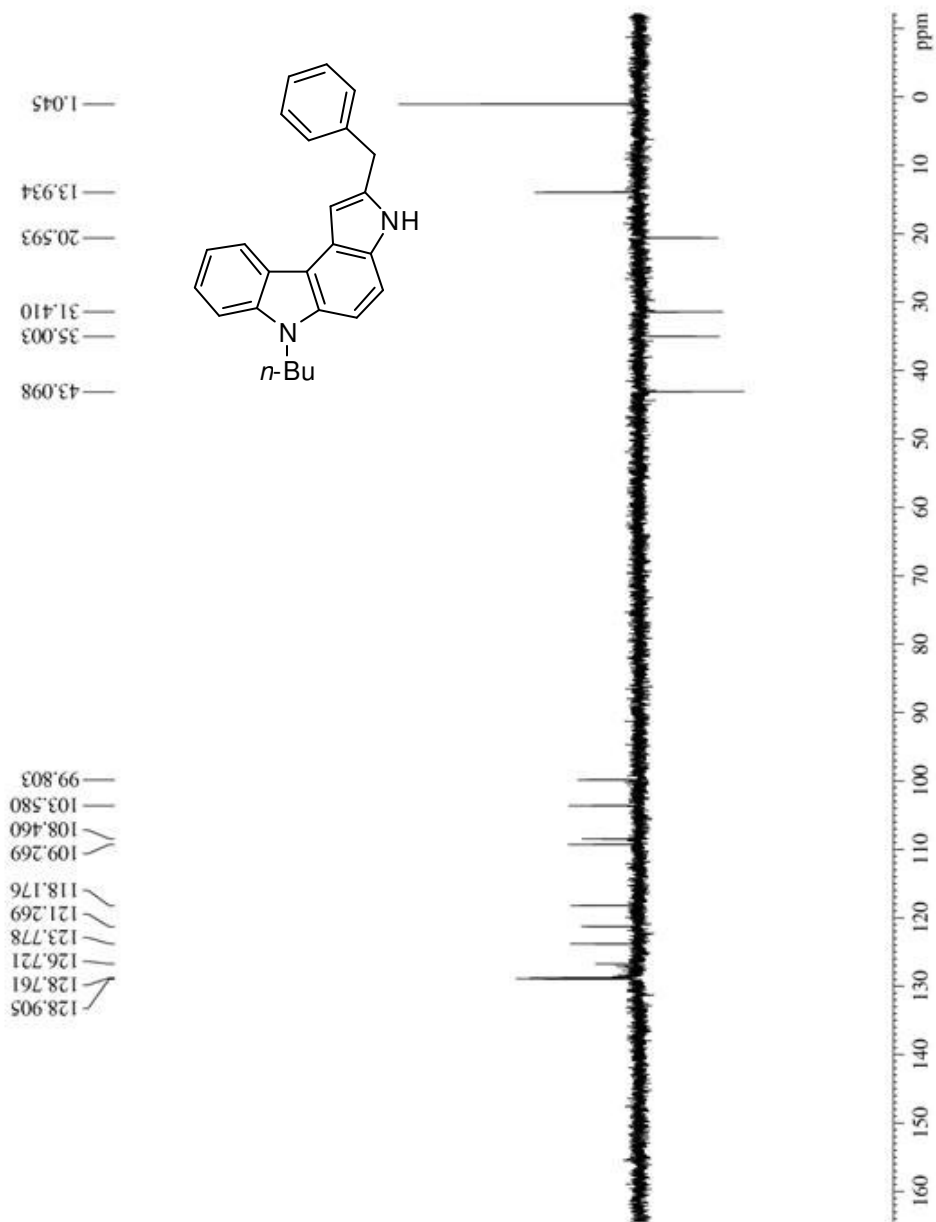



## LC-MS of 2-Benzyl-6-butyl-3,6-dihydropyrrolo[2,3-c]carbazole (31)

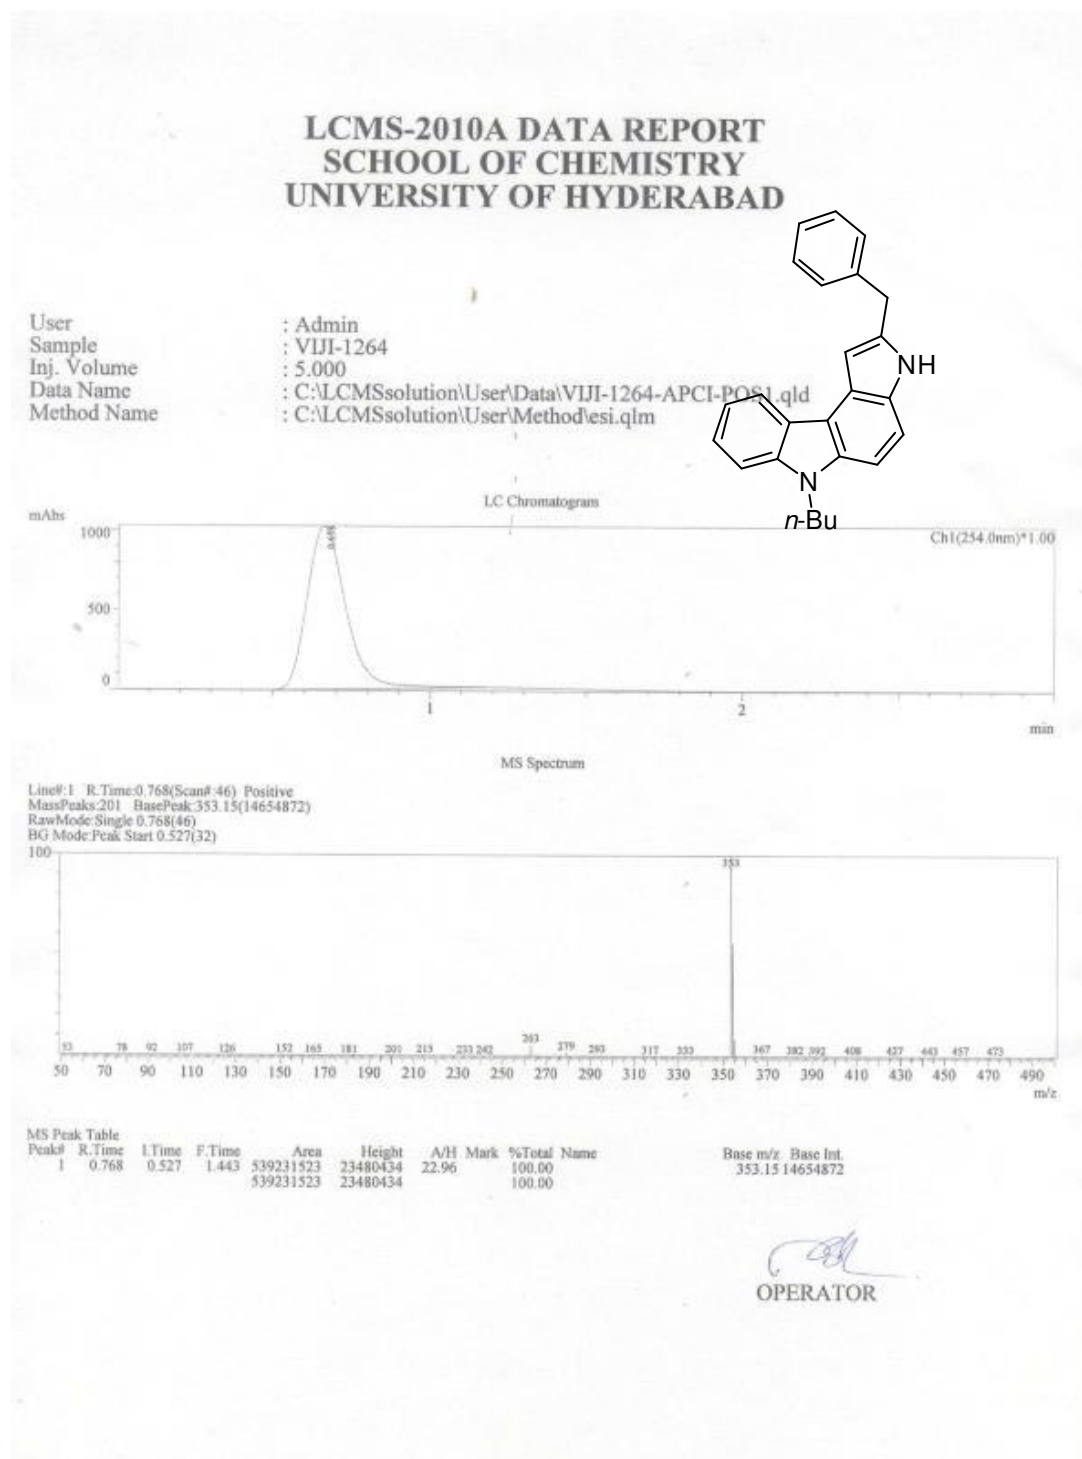

## Elemental Analysis of 2-Benzyl-6-butyl-3,6-dihydropyrrolo[2,3-c]carbazole (31)

FLASH EA 1112 SERIES CHN REPORT  
SCHOOL OF CHEMISTRY  
UNIVERSITY OF HYDERABAD

Method filename: C:\Program Files\Thermo Finnigan\Eager 300 for EA1112\DATA\Sys\_data\_ex  
Sample ID: VIJI-1264 (# 4)  
Analysis type: UnkNown  
Chromatogram filename: UNK-26072012-4.dat  
Sample weight: 1.315

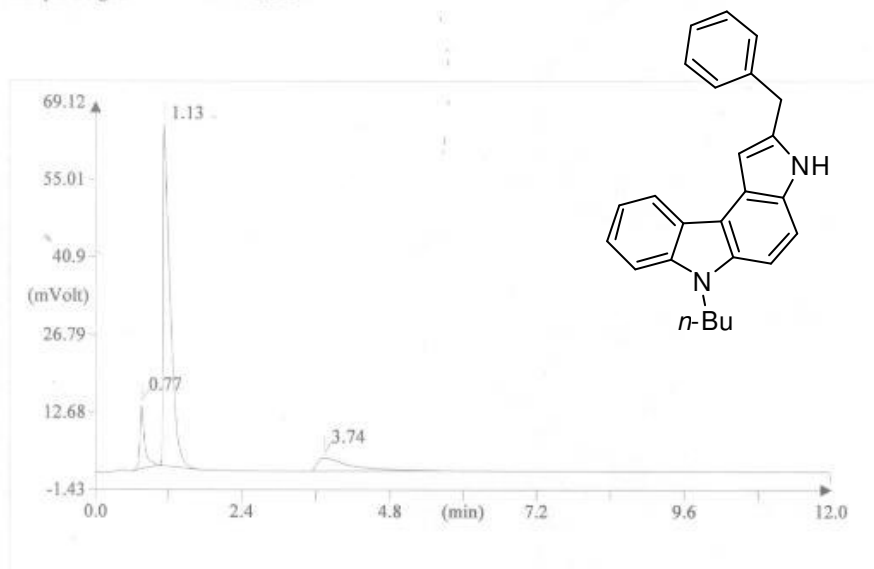

| Element Name | Element % | Ret. Time |
|--------------|-----------|-----------|
| Nitrogen     | 7.76      | 0.77      |
| Carbon       | 85.21     | 1.13      |
| Hydrogen     | 6.83      | 3.74      |

*(Handwritten signature)*

# <sup>1</sup>H NMR of 6-Ethyl-2-(4-methylbenzyl)-3,6-dihydropyrrolo[2,3-c]carbazole (3m)

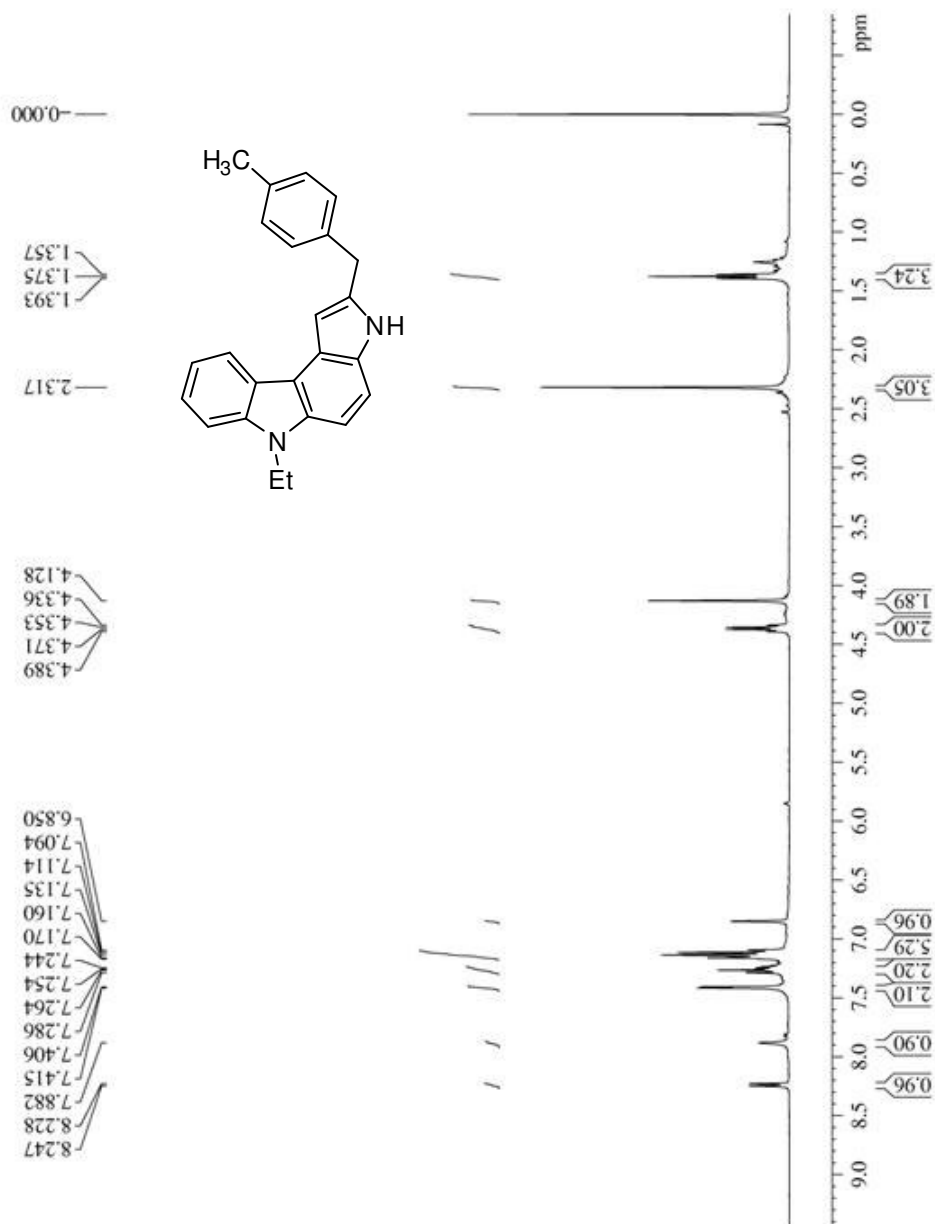

### $^{13}\text{C}$ NMR of 6-Ethyl-2-(4-methylbenzyl)-3,6-dihydropyrrolo[2,3-*c*]carbazole (3m)

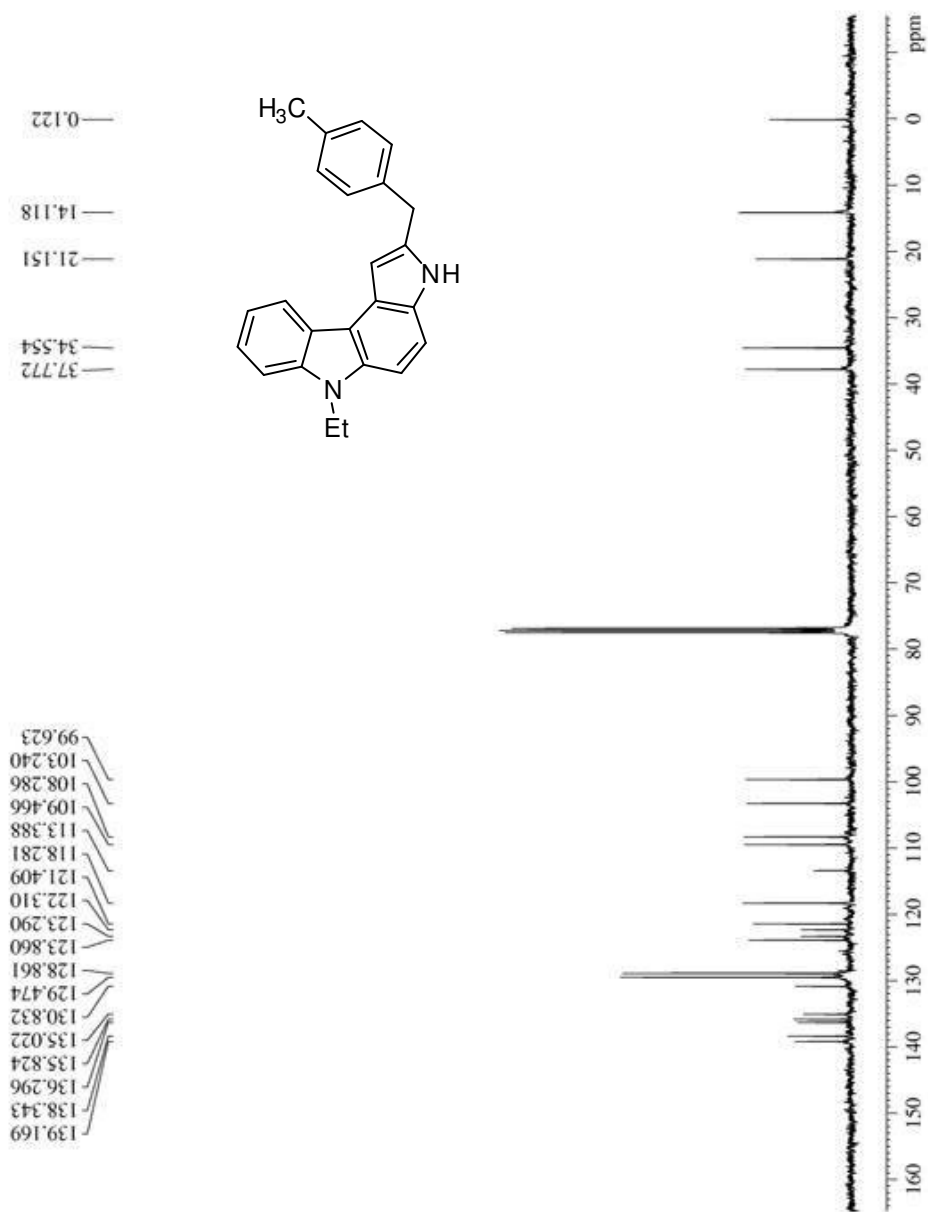

### DEPT of 6-Ethyl-2-(4-methylbenzyl)-3,6-dihydropyrrolo[2,3-c]carbazole (3m)

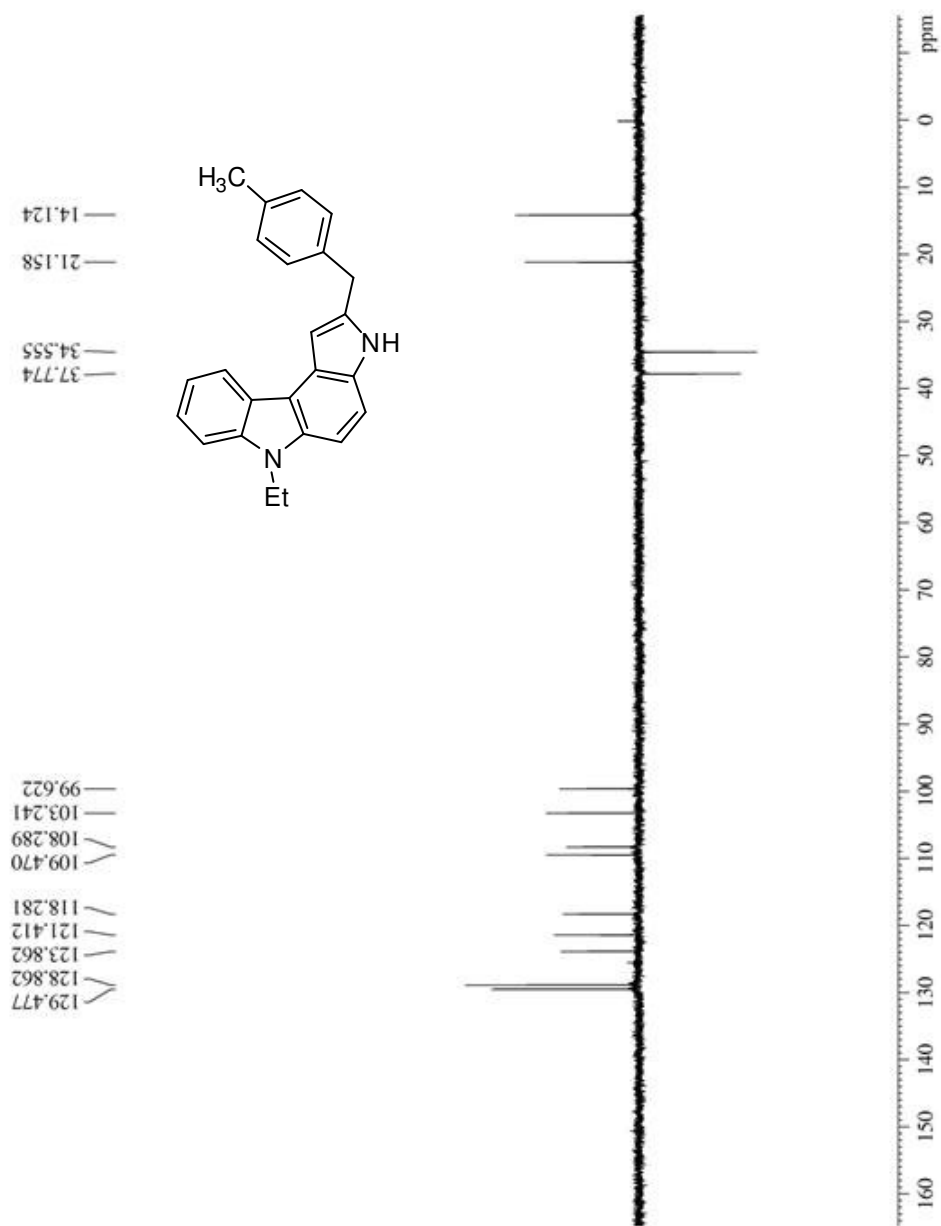

## LC-MS of 6-Ethyl-2-(4-methylbenzyl)-3,6-dihydropyrrolo[2,3-c]carbazole (3m)

### LCMS-2010A DATA REPORT SCHOOL OF CHEMISTRY UNIVERSITY OF HYDERABAD

User : Admin  
Sample : VIJI-1221  
Inj. Volume : 5.000  
Data Name : G:\LCMSSolution\User\Data\VIJI-1221-APCI-POS1.qld  
Method Name : C:\LCMSSolution\User\Method\Copy of JAY-4-APCI.qlm

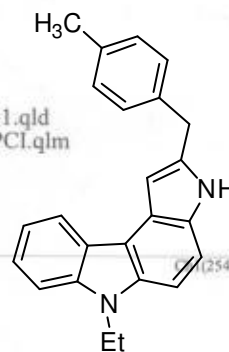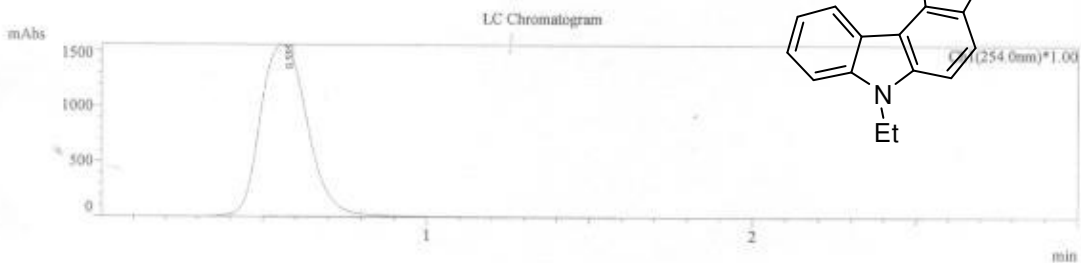

MS Spectrum

Line# 1 R.Time: 0.628(Scan# 38) Positive  
MassPeaks: 272 BasePeak: 339.05(1262006)  
RawMode: Single 0.628(38)  
BG Mode: Peak Start 0.443(27)

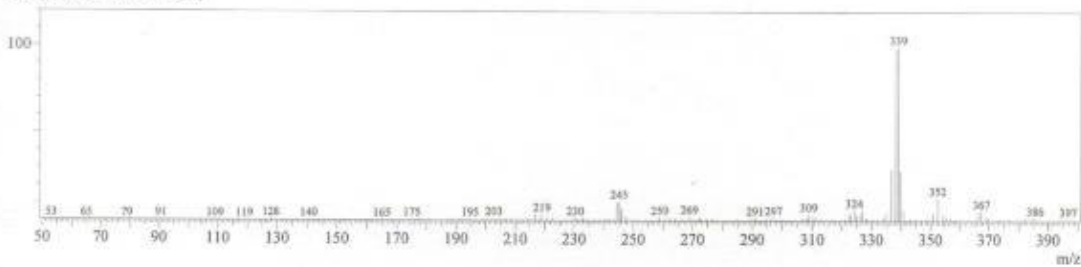

MS Peak Table

| Peak# | R.Time | I.Time | F.Time | Area     | Height  | A/H   | Mark | %Total | Name | Base m/z | Base Int. |
|-------|--------|--------|--------|----------|---------|-------|------|--------|------|----------|-----------|
| 1     | 0.628  | 0.443  | 0.843  | 94780062 | 8495166 | 11.15 |      | 100.00 |      | 339.05   | 1262006   |
|       |        |        |        | 94780062 | 8495166 |       |      | 100.00 |      |          |           |

  
OPERATOR

## Elemental Analysis of 6-Ethyl-2-(4-methylbenzyl)-3,6-dihydropyrrolo[2,3-c]carbazole (3m)

FLASH EA 1112 SERIES CHN REPORT  
SCHOOL OF CHEMISTRY  
UNIVERSITY OF HYDERABAD

Method filename: E:\Program Files\Thermo Finnigan\Eager 300 for EA1112\DATA\Sys\_data\_ex  
Sample ID: VIJ-1221 (# 7)  
Analysis type: UnkNown  
Chromatogram filename: UNK-11072012-7.dat  
Sample weight: 1.237

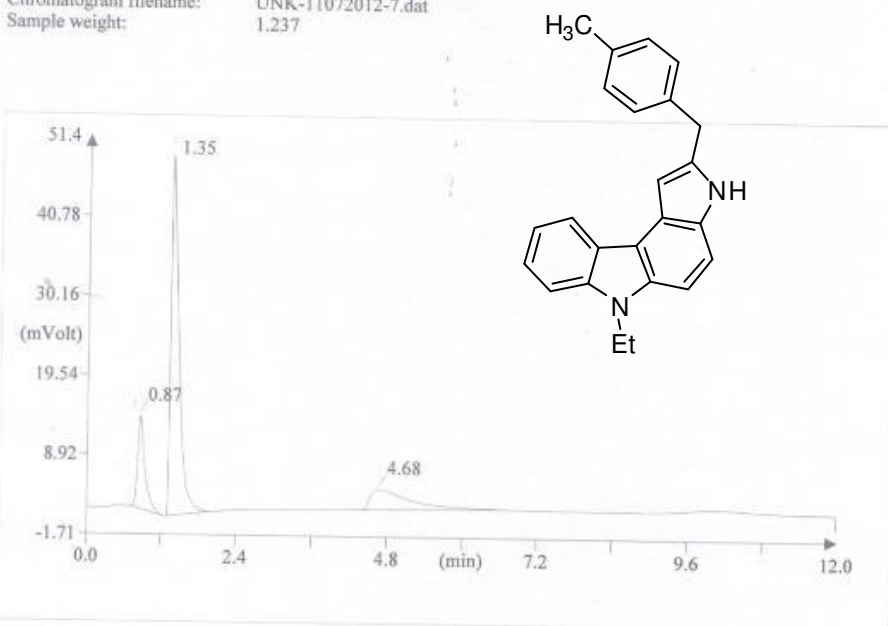

| Element Name | Element % | Ret. Time |
|--------------|-----------|-----------|
| Nitrogen     | 8.21      | 0.87      |
| Carbon       | 85.31     | 1.35      |
| Hydrogen     | 6.45      | 4.68      |

*Handwritten signature*

# <sup>1</sup>H NMR of 5-ethyl-2,4,10-trimethyl-1,5-dihydropyrrolo[3,2-*b*]carbazole (3n)

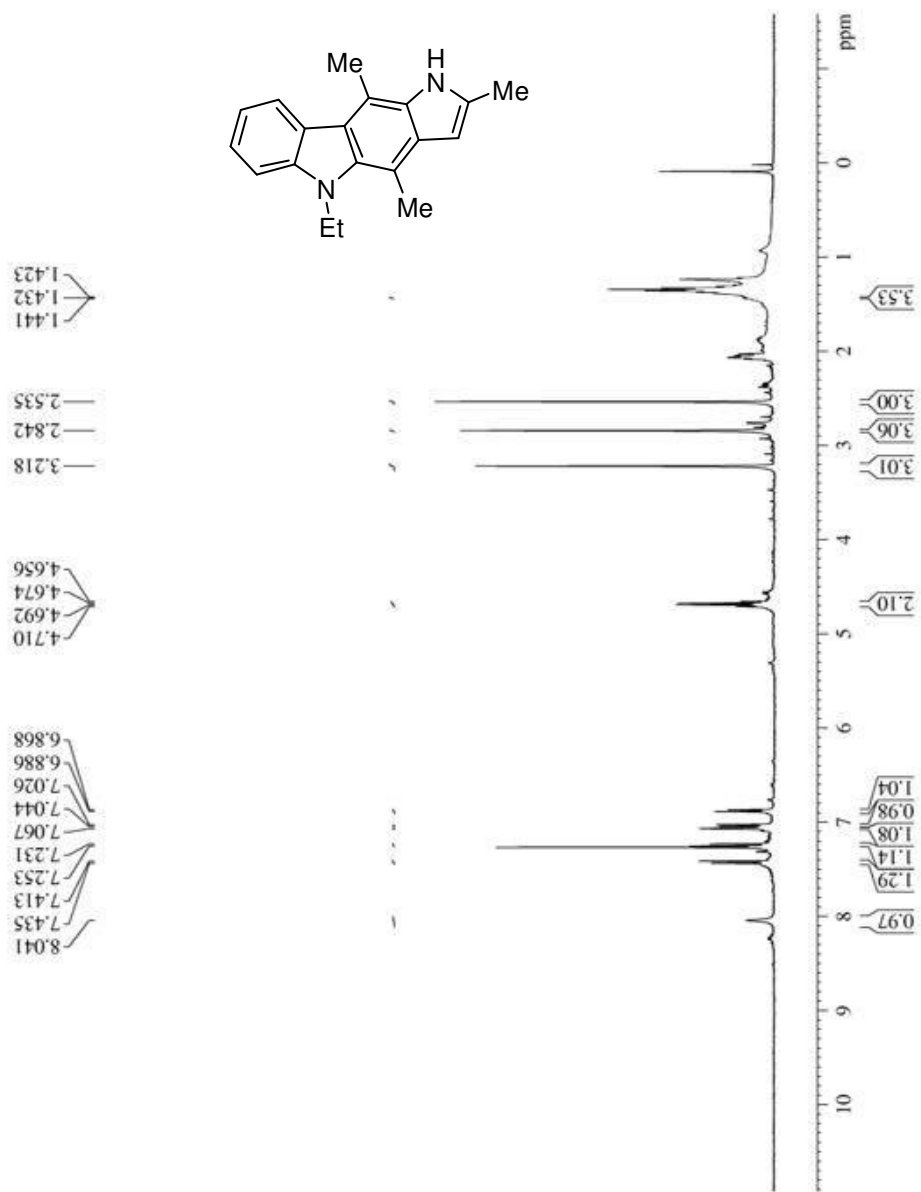



### $^{13}\text{C}$ NMR of 5-ethyl-2,4,10-trimethyl-1,5-dihydropyrrolo[3,2-*b*]carbazole (3n)

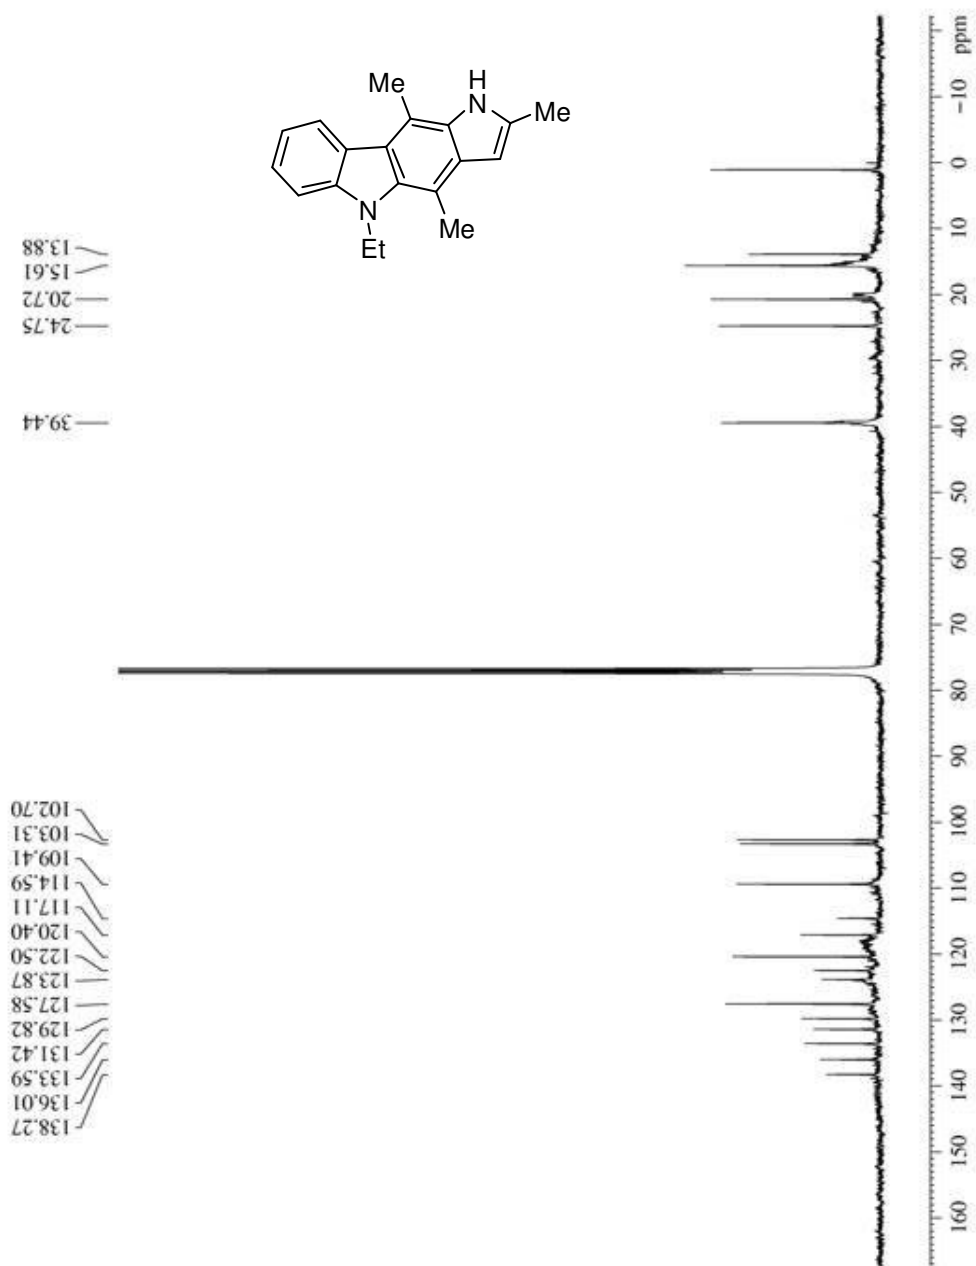

### DEPT of 5-ethyl-2,4,10-trimethyl-1,5-dihydropyrrolo[3,2-*b*]carbazole (3n)

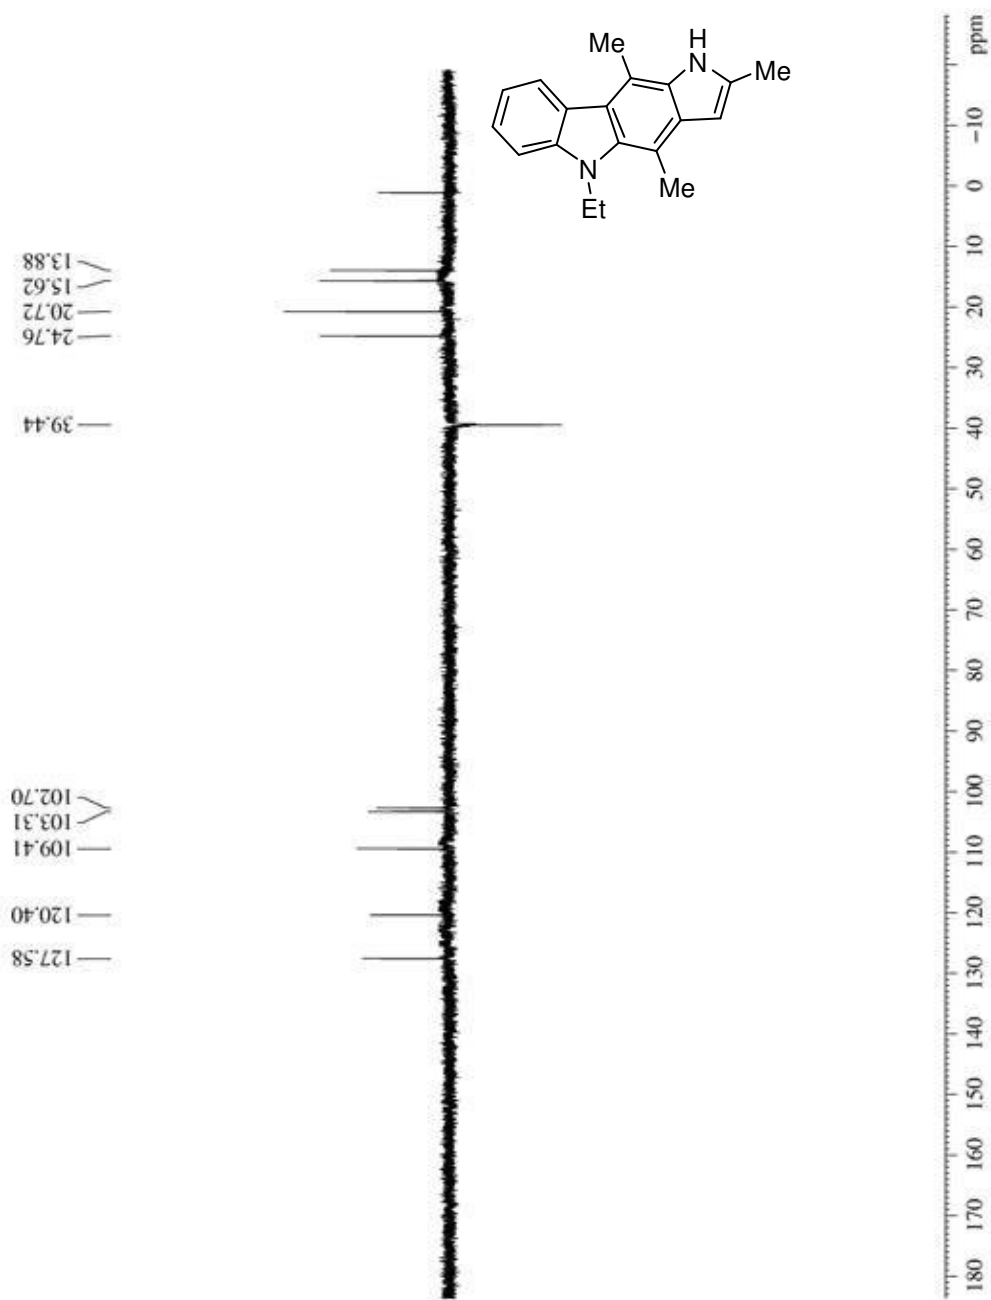

## LC-MS of 5-ethyl-2,4,10-trimethyl-1,5-dihydropyrrolo[3,2-*b*]carbazole (3n)

### LCMS-2010A DATA REPORT SCHOOL OF CHEMISTRY UNIVERSITY OF HYDERABAD

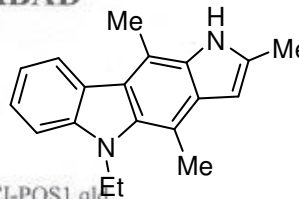

User : Admin  
Sample : VIII-1178  
Inj. Volume : 5.000  
Data Name : G:\LCMSsolution\User\Data\VIII-1178-APCI-POS1.qld  
Method Name : C:\LCMSsolution\User\Method\Copy of JAY-4-APCI.qlm

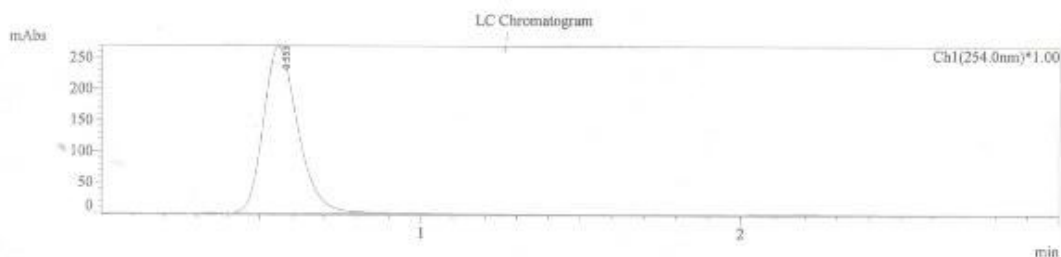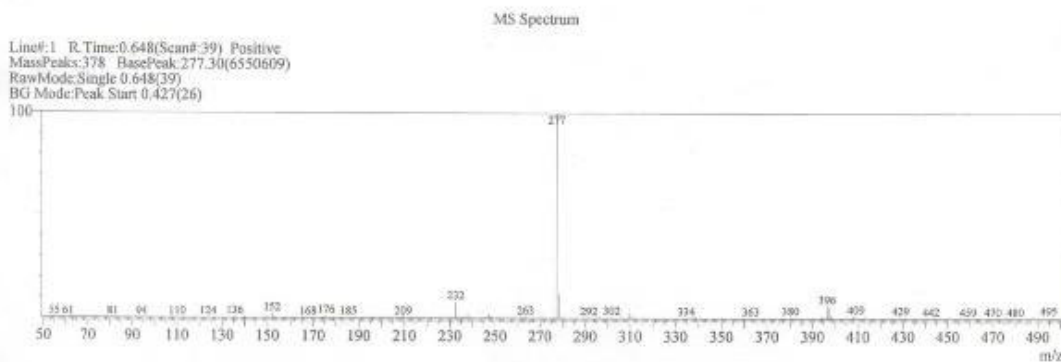

| Peak# | R.Time | U.Time | F.Time | Area      | Height   | A/I   | Mark | %Total | Name | Base m/z | Base Int. |
|-------|--------|--------|--------|-----------|----------|-------|------|--------|------|----------|-----------|
| 1     | 0.648  | 0.427  | 0.843  | 124712044 | 12321967 | 10.12 |      | 100.00 |      | 277.30   | 6550609   |
|       |        |        |        | 124712044 | 12321967 |       |      | 100.00 |      |          |           |

OPERATOR

## Elemental Analysis of 5-ethyl-2,4,10-trimethyl-1,5-dihydropyrrolo[3,2-*b*]carbazole (3n)

FLASH EA 1112 SERIES CHN REPORT  
SCHOOL OF CHEMISTRY  
UNIVERSITY OF HYDERABAD

Method filename: E:\Program Files\Thermo Finnigan\Eager 300 for EA1112\DATA\Sys\_data\_ex  
Sample ID: VIJI-1178 (# 13)  
Analysis type: UnkNown  
Chromatogram filename: UNK-11072012-13.dat  
Sample weight: 1.106

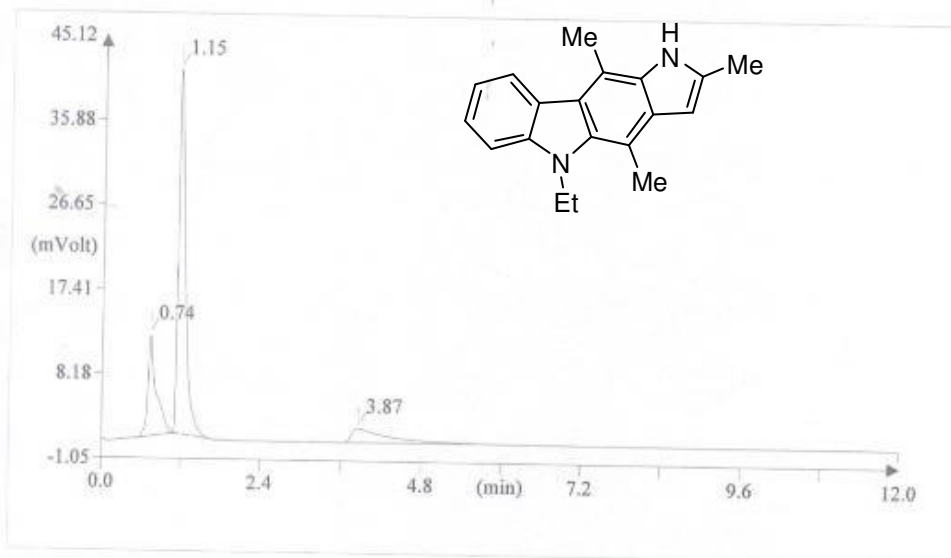

| Element Name | Element % | Ret. Time |
|--------------|-----------|-----------|
| Nitrogen     | 10.21     | 0.74      |
| Carbon       | 82.68     | 1.15      |
| Hydrogen     | 7.21      | 3.87      |

*Bl*
